# Supplementary material for: Exploring the versatility of pentafulvene–maleimide cycloaddition as a ligation strategy: buffer and pH effects
Source: Royal Society of Chemistry journal article supplement (doi:10.1039/d2ob01453j), 2022-01-01
Supplement: d2ob01453j1.pdf [file d2ob01453j1.pdf]

# Supporting Information

## Exploring the versatility of pentafulvene-maleimide cycloaddition as a ligation strategy: buffer and pH effects

Kirsten Platts,<sup>1</sup> Manisha Hota,<sup>1</sup> Chris Blencowe,<sup>2</sup> Anton Blencowe<sup>1,\*</sup>

<sup>1</sup> Applied Chemistry and Translational Biomaterials Group, Clinical and Health Sciences, University of South Australia, Adelaide, South Australia, 5000, Australia

<sup>2</sup> Fleet Bioprocessing, Hartley Whitney, Hampshire, RG27 8DH, UK

### Table of Contents

|        |                                                |    |
|--------|------------------------------------------------|----|
| 1      | Experimental procedures .....                  | 3  |
| 1.0    | Buffer preparation for stability studies ..... | 3  |
| 1.1    | Buffer preparation for kinetics testing .....  | 4  |
| 1.2    | Kinetics experiments .....                     | 5  |
| 2      | Stability .....                                | 7  |
| 2.1    | Maleimide stability .....                      | 7  |
| 2.1.1  | Glycine HCl pH 3.7 .....                       | 7  |
| 2.1.2  | MES pH 5.5.....                                | 8  |
| 2.1.3  | BTM pH 6.4 .....                               | 9  |
| 2.1.4  | BTP pH 6.9.....                                | 10 |
| 2.1.5  | Imidazole HCl pH 6.9.....                      | 11 |
| 2.1.6  | PIPES pH 6.9.....                              | 12 |
| 2.1.7  | Deuterium oxide pH 7.1.....                    | 13 |
| 2.1.8  | PBS pH 7.3.....                                | 14 |
| 2.1.9  | HEPES pH 7.4 .....                             | 15 |
| 2.1.10 | Trizma pH 7.4.....                             | 16 |
| 2.1.11 | Tricine pH 8.0.....                            | 17 |
| 2.1.12 | Bicine pH 8.1 .....                            | 18 |
| 2.1.13 | Glycine NaOH pH 8.7 .....                      | 19 |
| 2.1.14 | CAPS pH 10.1 .....                             | 20 |
| 2.2    | Fulvene Stability .....                        | 21 |
| 2.2.1  | Glycine HCl pH 3.7 .....                       | 21 |
| 2.2.2  | MES pH 5.5.....                                | 22 |

|        |                              |    |
|--------|------------------------------|----|
| 2.2.3  | BTM pH 6.4 .....             | 23 |
| 2.2.4  | BTP pH 6.9.....              | 24 |
| 2.2.5  | Imidazole HCl pH 6.9.....    | 25 |
| 2.2.6  | PIPES pH 6.9.....            | 26 |
| 2.2.7  | Deuterium oxide pH 7.1.....  | 27 |
| 2.2.8  | PBS pH 7.3.....              | 28 |
| 2.2.9  | HEPES pH 7.4 .....           | 29 |
| 2.2.10 | Trizma pH 7.4.....           | 30 |
| 2.2.11 | Tricine pH 8.0.....          | 31 |
| 2.2.12 | Bicine pH 8.1 .....          | 32 |
| 2.2.13 | Glycine NaOH pH 8.7 .....    | 33 |
| 2.2.14 | CAPS pH 10.1 .....           | 34 |
| 3      | Kinetic Studies .....        | 35 |
| 3.1    | Glycine HCl pH 3.5 .....     | 35 |
| 3.2    | MES pH 5.5 .....             | 38 |
| 3.3    | BTM pH 6.5 .....             | 41 |
| 3.4    | BTP pH 7.0 .....             | 44 |
| 3.5    | Imidazole HCl pH 7.0.....    | 47 |
| 3.6    | PIPES pH 7.0.....            | 50 |
| 3.7    | Ultrapure Water pH 7.0 ..... | 53 |
| 3.8    | PBS pH 7.4.....              | 56 |
| 3.9    | HEPES pH 7.5 .....           | 59 |
| 3.10   | Trizma pH 7.5.....           | 62 |
| 3.11   | Tricine pH 8.1.....          | 65 |
| 3.12   | Bicine pH 8.3.....           | 68 |
| 3.13   | Glycine NaOH pH 8.9 .....    | 71 |

# 1 Experimental procedures

## 1.0 Buffer preparation for stability studies

**Table S1: Buffers for testing pentafulvene 1 and maleimide 2 stability in different buffer solutions after 1 and 24 h.**

| Buffer solution <sup>a</sup> | Buffer concentration (mM) | Buffering agent(s) (mg)                | Final volume (mL) | pH <sup>b</sup> | pH*  |
|------------------------------|---------------------------|----------------------------------------|-------------------|-----------------|------|
| Glycine HCl                  | 100                       | Glycine (15.8)                         | 2                 | 3.7             | 3.5  |
| MES                          | 100                       | MES hydrate (37.8)                     | 2                 | 5.5             | 5.5  |
| BTM                          | 100                       | BTM (40.1)                             | 2                 | 6.4             | 6.5  |
| BTP                          | 100                       | BTP (58.5)                             | 2                 | 6.9             | 7.0  |
| Imidazole HCl                | 100                       | Imidazole (13.7)                       | 2                 | 6.9             | 7.0  |
| PIPES                        | 100                       | PIPES (120)                            | 2                 | 6.9             | 7.0  |
| HEPES                        | 100                       | HEPES (47.7)                           | 2                 | 7.4             | 7.5  |
| Trizma                       | 100                       | Trizma HCl (26.1)<br>Trizma base (5.0) | 2                 | 7.4             | 7.5  |
| Tricine                      | 100                       | Tricine (36.5)                         | 2                 | 8.0             | 8.1  |
| Bicine                       | 100                       | Bicine (33.5)                          | 2                 | 8.1             | 8.3  |
| Glycine NaOH                 | 100                       | Glycine (15.8)                         | 2                 | 8.7             | 8.9  |
| CAPS                         | 100                       | CAPS (43.2)                            | 2                 | 10.1            | 10.4 |

<sup>a</sup> All buffer solutions were prepared at 100 mM in D<sub>2</sub>O and pH adjusted prior to addition of coupling partners. Abbreviations; MES: 2-(*N*-morpholino)ethanesulfonic acid, BTM: 2-[bis(2-hydroxyethyl)amino]-2-(hydroxymethyl)propane-1,3-diol, BTP: 2,2'-[propane-1,3-diylbis(azanediyl)]bis[2-(hydroxymethyl)propane-1,3-diol], PIPES: 2,2'-(piperazine-1,4-diyl)di(ethane-1-sulfonic acid), HEPES: 2-[4-(2-hydroxyethyl)piperazin-1-yl]ethanesulfonic acid, Trizma: tris(hydroxymethyl)aminomethane, Tricine: *N*-(tri(hydroxymethyl)methyl)glycine, Bicine: *N,N*-bis(2-hydroxyethyl)glycine, CAPS: *N*-cyclohexyl-3-aminopropanesulfonic acid. <sup>b</sup> pH of buffer solutions calculated from pH\* readings taken in D<sub>2</sub>O.<sup>[1]</sup>

## 1.1 Buffer preparation for kinetics testing

**Table S2: Buffers for determination of kinetics, half-lives and stereoselectivity for the Diels-Alder cycloaddition between pentafulvene 1 and maleimide 2 in different buffer solutions.**

| Buffer Solution | Buffer concentration (mM) | Buffering agents(s) (g)                   | Final volume (mL) | pH   |
|-----------------|---------------------------|-------------------------------------------|-------------------|------|
| glycine HCl     | 100                       | Glycine (0.380)                           | 50                | 3.5  |
| MES             | 100                       | MES (1.952)                               | 100               | 5.5  |
| BTM             | 100                       | BTM (1.035)                               | 50                | 6.5  |
| BTP             | 100                       | BTP (1.13)                                | 50                | 7.0  |
| Imidazole HCl   | 100                       | Imidazole (0.345)                         | 50                | 7.0  |
| PIPES           | 100                       | PIPES (3.01)                              | 50                | 7.0  |
| HEPES           | 100                       | HEPES (1.19)                              | 100               | 7.5  |
| Trizma          | 100                       | Trizma HCl (1.246)<br>Trizma base (0.253) | 100               | 7.5  |
| Tricine         | 100                       | Tricine (1.79)                            | 100               | 8.1  |
| Bicine          | 100                       | Bicine (0.818)                            | 50                | 8.3  |
| Glycine NaOH    | 100                       | Glycine (0.38)                            | 50                | 8.9  |
| CAPS            | 100                       | CAPS (1.1)                                | 50                | 10.4 |

## 1.2 Kinetics experiments

**Table S3: The initial and final concentrations of pentafulvene 1 and maleimide 2 for determination of kinetics, half-lives and stereoselectivity for the Diels-Alder cycloaddition, including the quenching method used in different buffer solutions.**

| Buffer Solution | Fulvene 1 initial concentration (mmol) | Maleimide 2 initial concentration (mmol) | Final concentration 1 and 2 (mmol) | Quenching method <sup>a</sup> |
|-----------------|----------------------------------------|------------------------------------------|------------------------------------|-------------------------------|
| glycine HCl     | 20                                     | 20                                       | 10                                 | MCE                           |
| MES             | 25                                     | 25                                       | 12.5                               | MCE                           |
| BTM             | 25                                     | 25                                       | 12.5                               | MCE                           |
| BTP             | 20                                     | 20                                       | 10                                 | MCE                           |
| Imidazole HCl   | 20                                     | 20                                       | 10                                 | MeOH                          |
| PIPES           | 25                                     | 25                                       | 12.5                               | MeOH                          |
| HEPES           | 25                                     | 25                                       | 12.5                               | MeOH                          |
| Trizma          | 25                                     | 25                                       | 12.5                               | MCE                           |
| Tricine         | 25                                     | 25                                       | 12.5                               | MCE                           |
| Bicine          | 25                                     | 25                                       | 12.5                               | MCE                           |
| Glycine NaOH    | 20                                     | 20                                       | 10                                 | MCE                           |
| CAPS            | 25                                     | 25                                       | 12.5                               | MeOH                          |

<sup>a</sup> Quenched by the addition of mercaptoethanol (MCE) or methanol (MeOH)

**Table S4: Comparison of rate constants and initial rates for the hydrolysis of maleimide **2** and the Diels-Alder cycloaddition.**

| Buffer <sup>a</sup> | $k_1^{obs}(Hyd)$<br>( $\times 10^{-6} s^{-1}$ ) <sup>b</sup> | $k_{2,(DAC)}$<br>( $M^{-1}s^{-1}$ ) <sup>c</sup> | $K_{(Hyd)}$<br>( $\times 10^{-9} M.s^{-1}$ ) <sup>d</sup> | $K_{(DAC)}$<br>( $\times 10^{-8} M.s^{-1}$ ) <sup>d</sup> | $(K_{(DAC)}/K_{(Hyd)})^d$ | Conc. of<br><b>1 and 2</b><br>(mM) <sup>e</sup> |
|---------------------|--------------------------------------------------------------|--------------------------------------------------|-----------------------------------------------------------|-----------------------------------------------------------|---------------------------|-------------------------------------------------|
| Imidazole           | 1.77                                                         | 0.16                                             | 2.02                                                      | 2.01                                                      | 10                        | 0.11                                            |
| PIPES               | 4.69                                                         | 0.14                                             | 1.55                                                      | 1.55                                                      | 10                        | 0.33                                            |
| HEPES               | 1.79                                                         | 0.17                                             | 0.18                                                      | 0.19                                                      | 10                        | 0.11                                            |
| Tricine             | 2.58                                                         | 0.25                                             | 0.27                                                      | 0.27                                                      | 10                        | 0.10                                            |
| Bicine              | 4.69                                                         | 0.18                                             | 1.24                                                      | 1.24                                                      | 10                        | 0.26                                            |

<sup>a</sup> Buffers in which maleimide hydrolysis was observed in the absence of pentafulvene (**Table 1**). <sup>b</sup> Pseudo first-order rate constant for hydrolysis of maleimide **2** in buffers in D<sub>2</sub>O. <sup>c</sup> Second-order rate constant for Diels Alder cycloaddition between **1** and **2** (**Table 2**). <sup>d</sup> Initial rate of hydrolysis of maleimide **2** and Diels-Alder cycloaddition that provide a relative initial rate equal to 10. <sup>e</sup> Initial concentration of pentafulvene **1** and maleimide **2** when the  $K_{(DAC)}/K_{(Hyd)}$  equals 10

## 2 Stability

### 2.1 Maleimide stability

#### 2.1.1 Glycine HCl pH 3.7

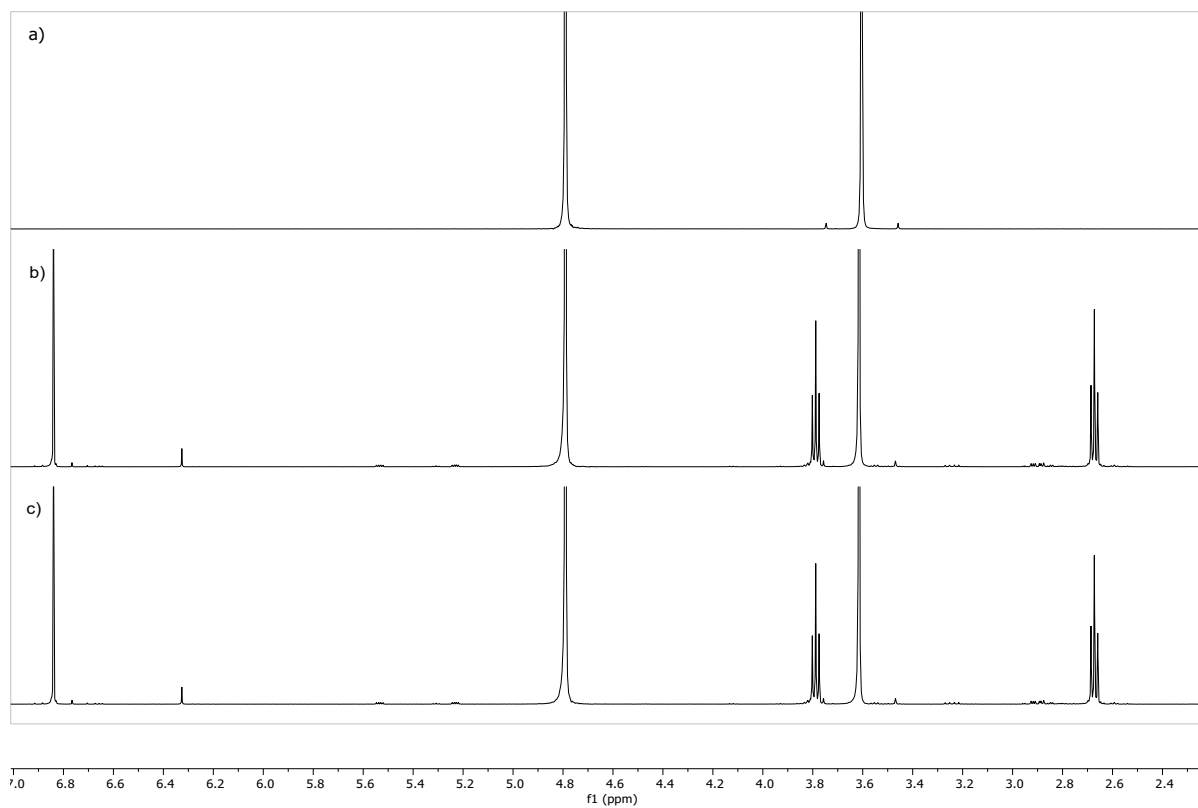

**Figure S1:** <sup>1</sup>H NMR spectra (500 MHz, D<sub>2</sub>O) of (a) glycine HCl buffer (100 mM, pH 3.7) and maleimide **2** after (b) 1 and (c) 24 h in the buffer at 21 ± 1 °C.

## 2.1.2 MES pH 5.5

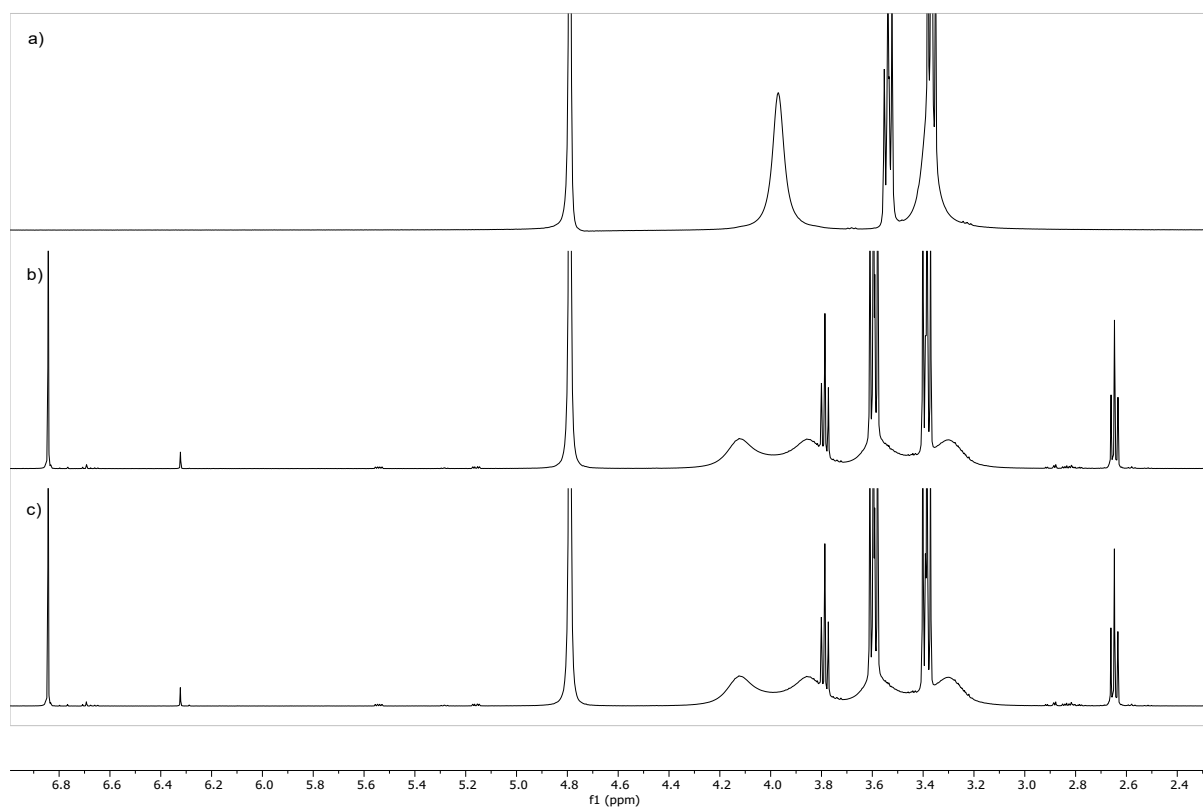

**Figure S2:** <sup>1</sup>H NMR spectra (500 MHz, D<sub>2</sub>O) of (a) MES buffer (100 mM, pH 5.5) and maleimide **2** after (b) 1 and (c) 24 h in the buffer at 21 ± 1 °C.



### 2.1.3 BTM pH 6.4

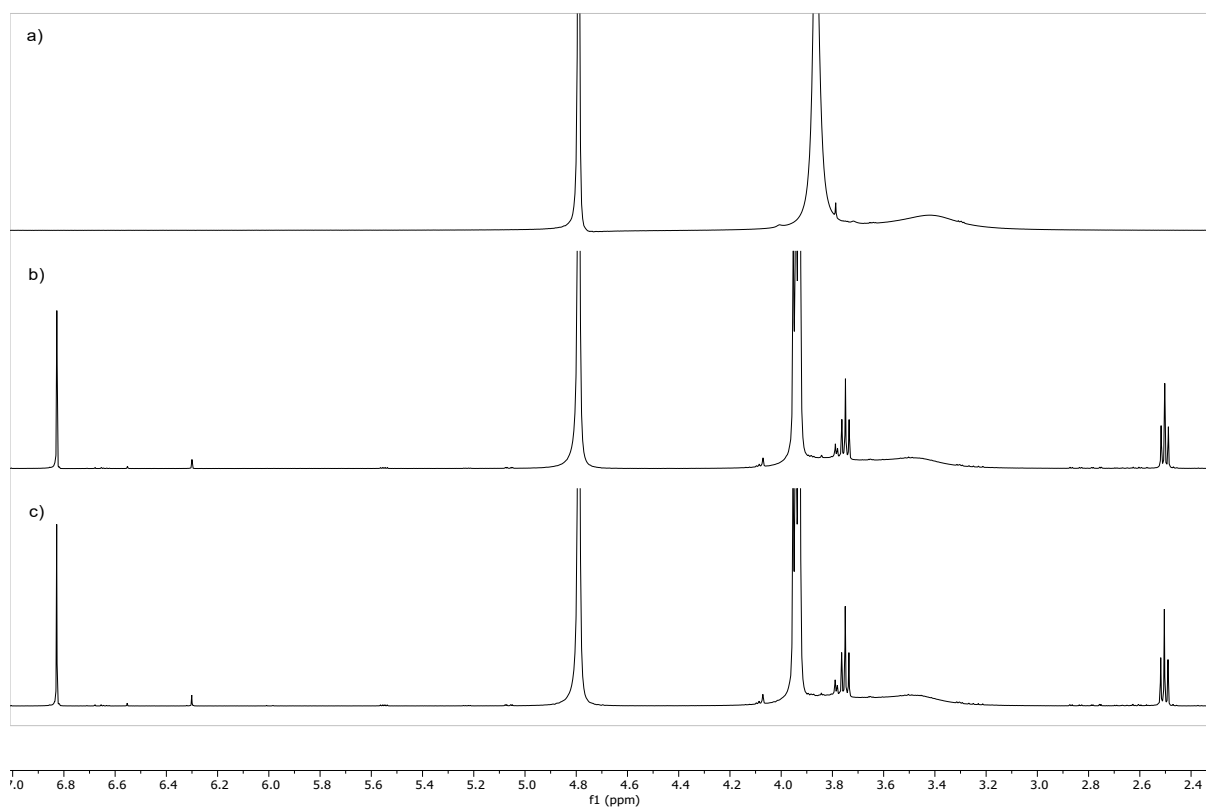

**Figure S3:** <sup>1</sup>H NMR spectra (500 MHz, D<sub>2</sub>O) of (a) BTM buffer (100 mM, pH 6.4) and maleimide **2** after (b) 1 and (c) 24 h in the buffer at 21 ± 1 °C.

## 2.1.4 BTP pH 6.9

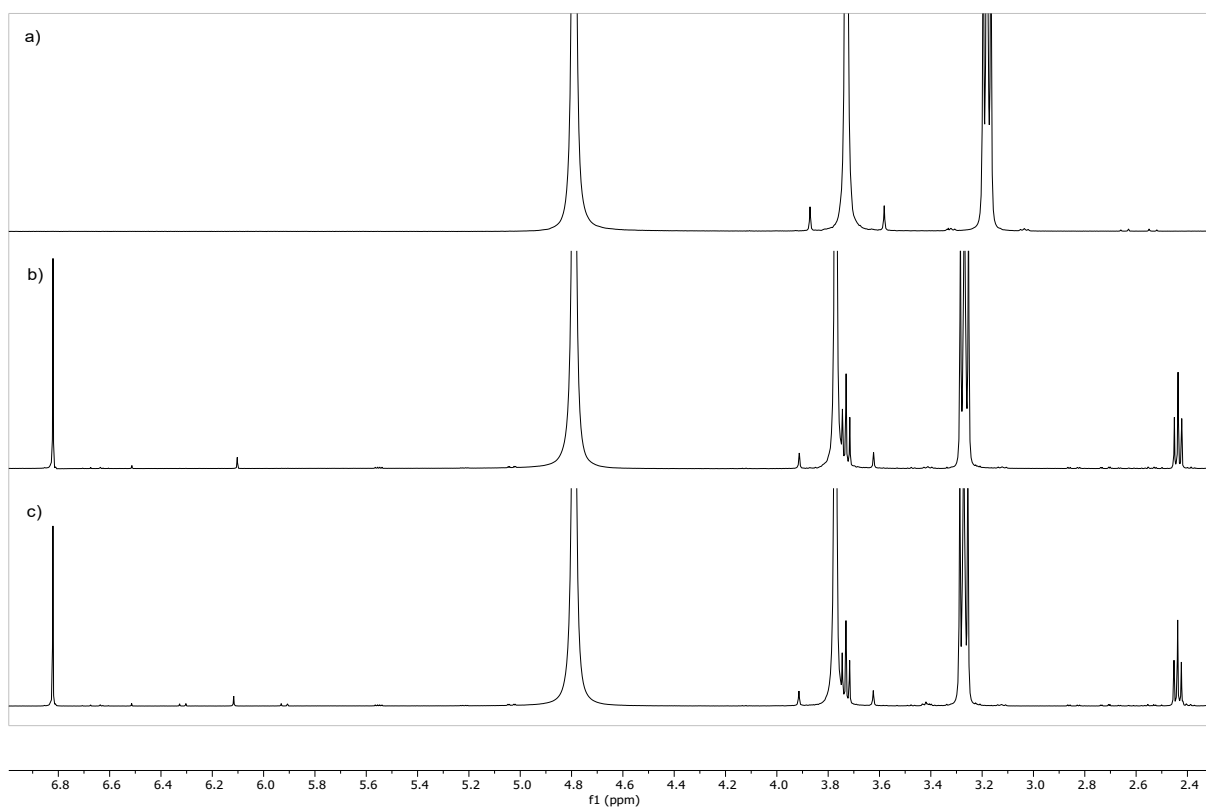

**Figure S4:** <sup>1</sup>H NMR spectra (500 MHz, D<sub>2</sub>O) of (a) BTP buffer (100 mM, pH 6.9) and maleimide **2** after (b) 1 and (c) 24 h in the buffer at 21 ± 1 °C.

## 2.1.5 Imidazole HCl pH 6.9

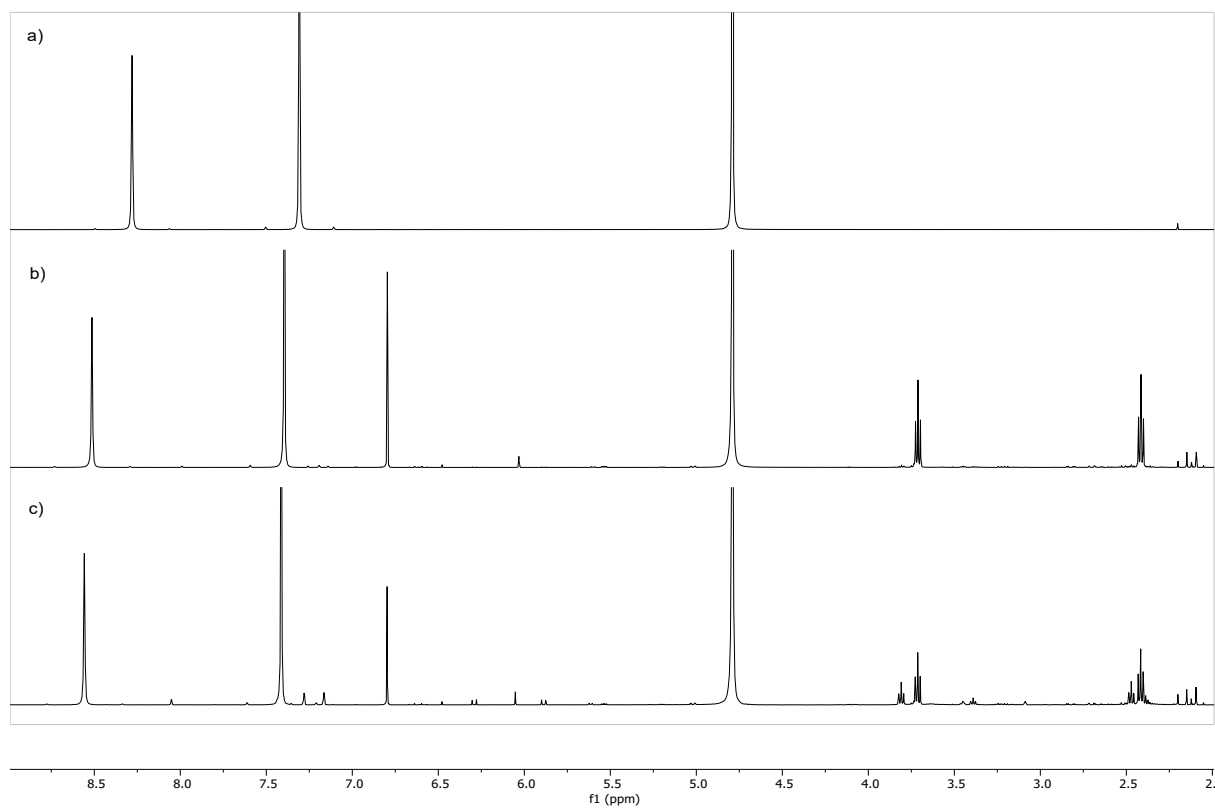

**Figure S5:** <sup>1</sup>H NMR spectra (500 MHz, D<sub>2</sub>O) of (a) imidazole HCl buffer (100 mM, pH 6.9) and maleimide **2** after (b) 1 and (c) 24 h in the buffer at 21 ± 1 °C.

## 2.1.6 PIPES pH 6.9

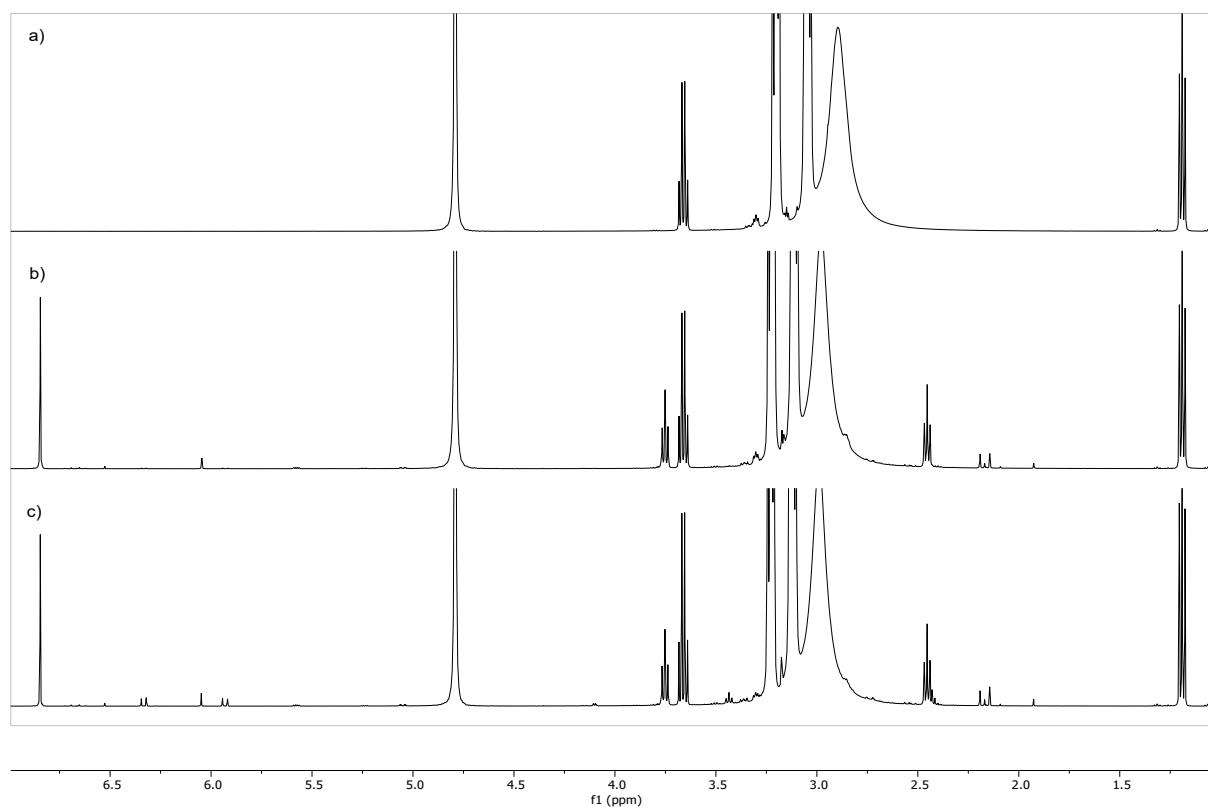

**Figure S6:** <sup>1</sup>H NMR spectra (500 MHz, D<sub>2</sub>O) of (a) PIPES buffer (100 mM, pH 6.9) and maleimide **2** after (b) 1 and (c) 24 h in the buffer at 21 ± 1 °C.

### 2.1.7 Deuterium oxide pH 7.1

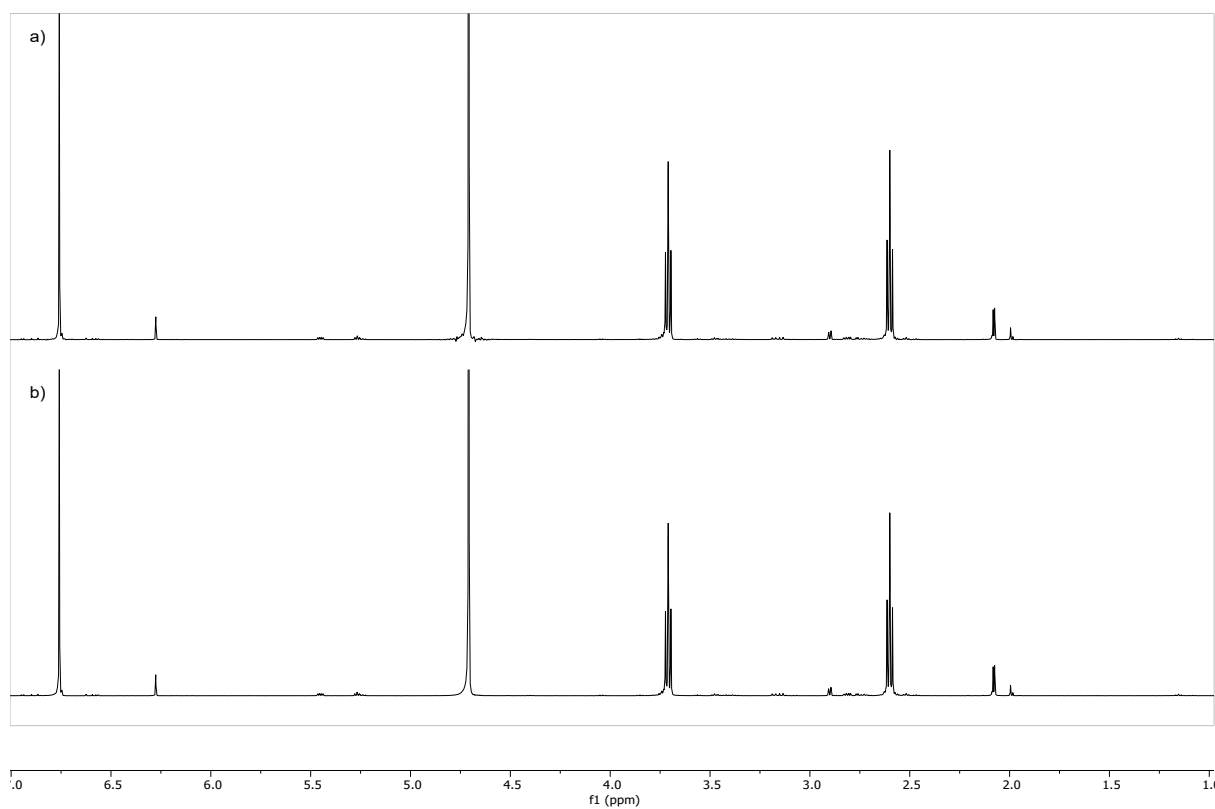

**Figure S7:**  $^1\text{H}$  NMR spectra (500 MHz,  $\text{D}_2\text{O}$ ) of maleimide **2** after (a) 1 and (b) 24 h in the  $\text{D}_2\text{O}$  (pH 7.1) at  $21 \pm 1$  °C.

## 2.1.8 PBS pH 7.3

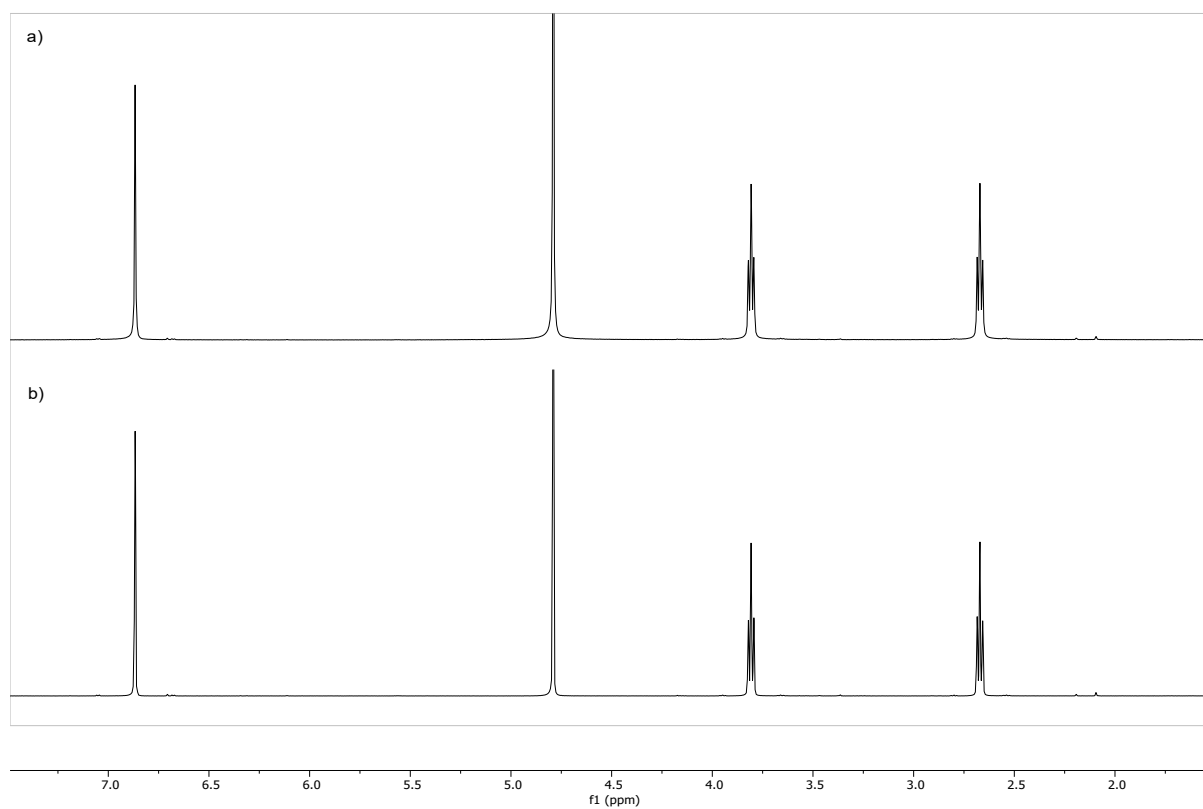

**Figure S8:** <sup>1</sup>H NMR spectra (500 MHz, D<sub>2</sub>O) of (a) PBS buffer (100 mM, pH 7.3) and maleimide **2** after (b) 1 and (c) 24 h in the buffer at 21 ± 1 °C.

## 2.1.9 HEPES pH 7.4

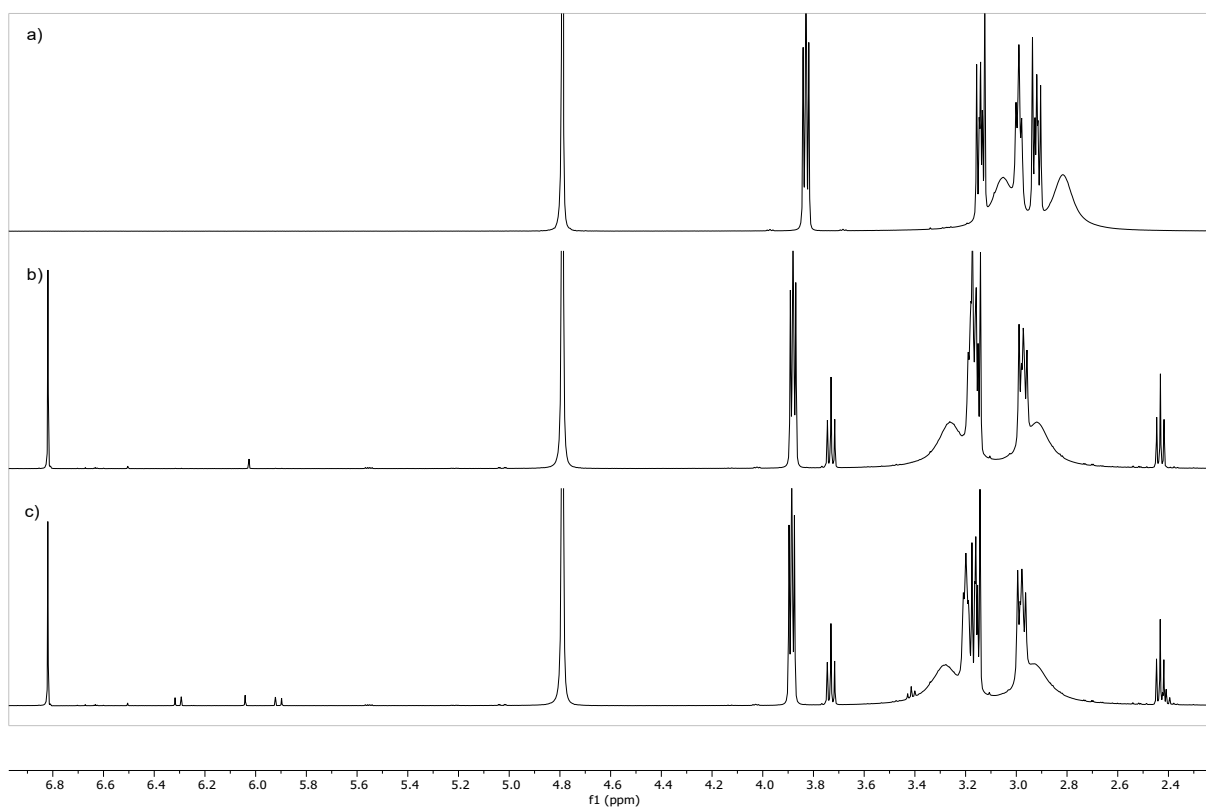

**Figure S9:** <sup>1</sup>H NMR spectra (500 MHz, D<sub>2</sub>O) of (a) HEPES buffer (100 mM, pH 7.4) and maleimide **2** after (b) 1 and (c) 24 h in the buffer at 21 ± 1 °C.

### 2.1.10 Trizma pH 7.4

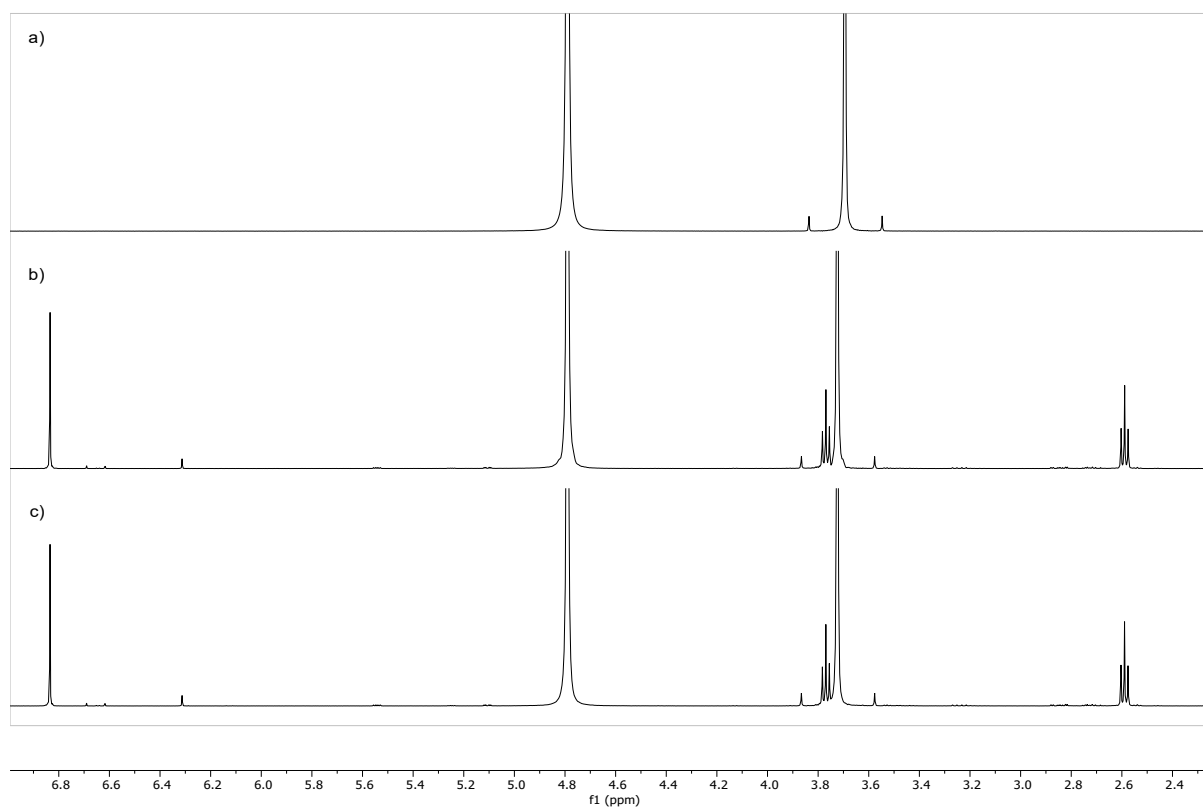

**Figure S10:**  $^1\text{H}$  NMR spectra (500 MHz,  $\text{D}_2\text{O}$ ) of (a) Trizma buffer (100 mM, pH 7.4) and maleimide **2** after (b) 1 and (c) 24 h in the buffer at  $21 \pm 1$  °C.



### 2.1.11 Tricine pH 8.0

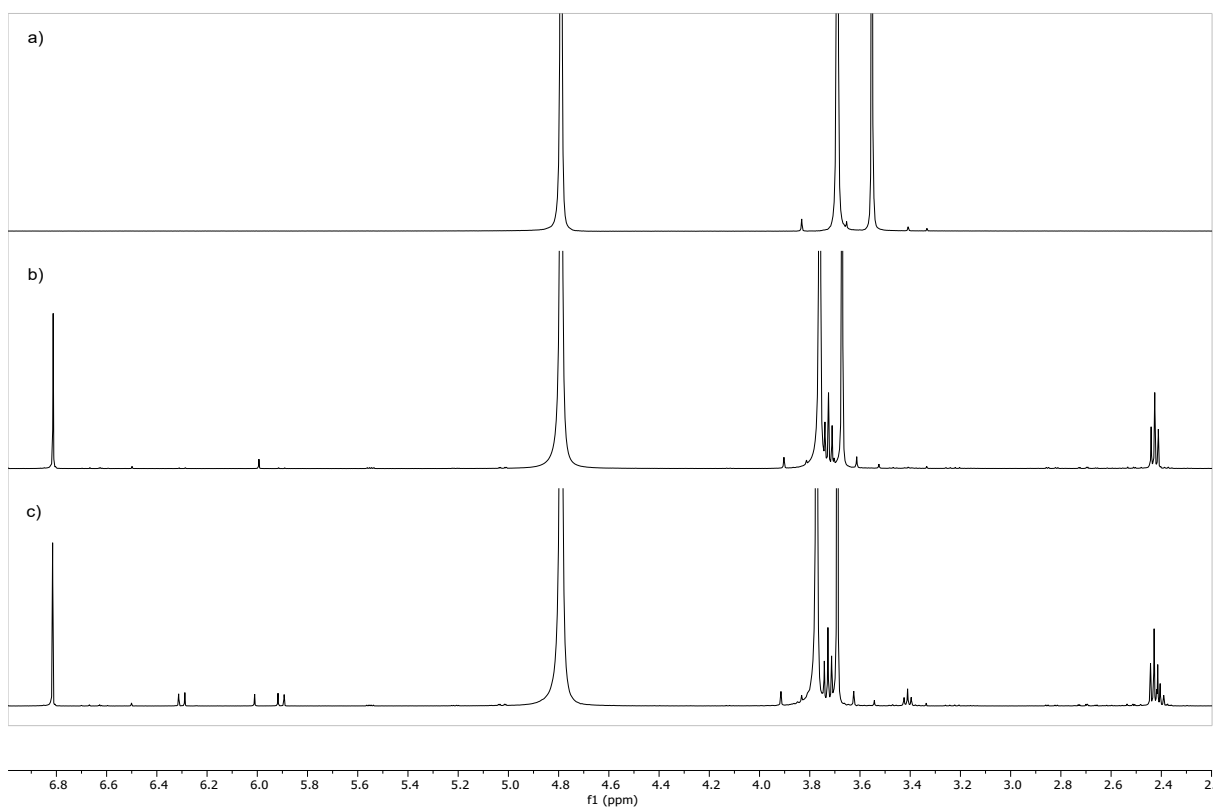

**Figure S11:** <sup>1</sup>H NMR spectra (500 MHz, D<sub>2</sub>O) of (a) Tricine buffer (100 mM, pH 8.0) and maleimide **2** after (b) 1 and (c) 24 h in the buffer at 21 ± 1 °C.

## 2.1.12 Bicine pH 8.1

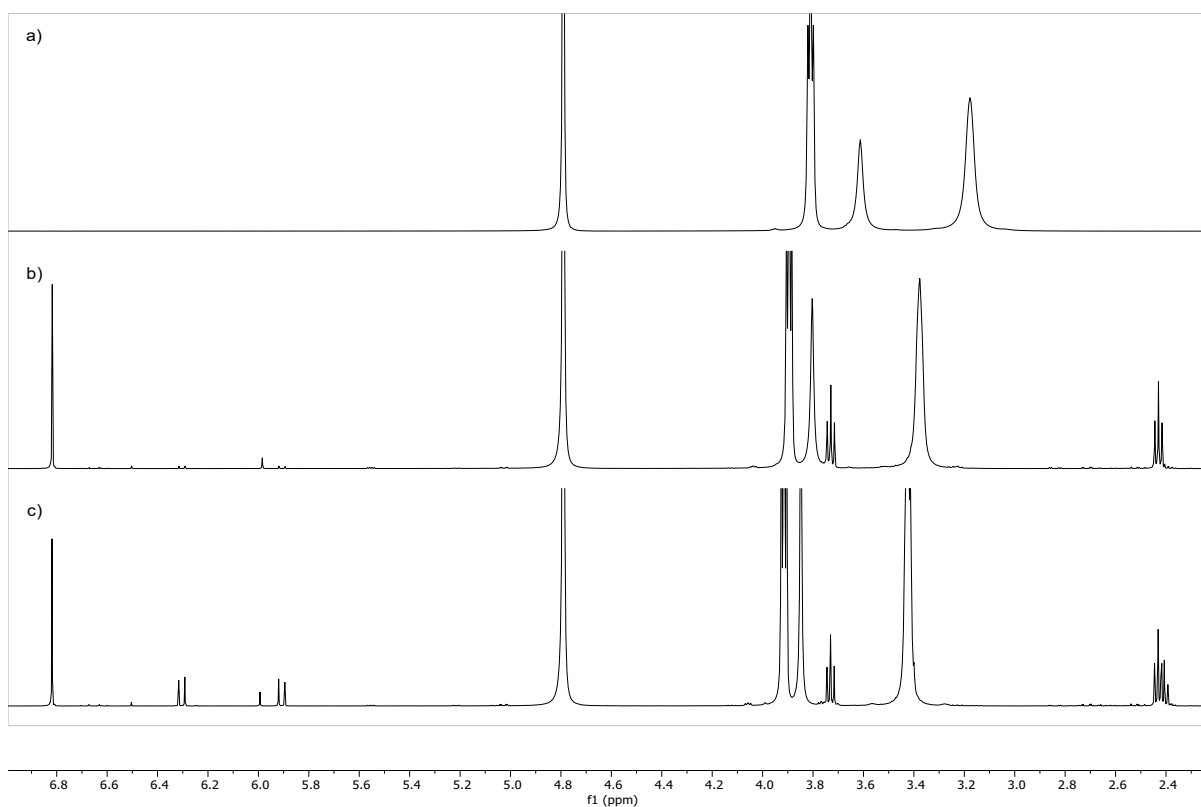

**Figure S12:** <sup>1</sup>H NMR spectra (500 MHz, D<sub>2</sub>O) of (a) Bicine buffer (100 mM, pH 8.1) and maleimide **2** after (b) 1 and (c) 24 h in the buffer at 21 ± 1 °C.

### 2.1.13 Glycine NaOH pH 9.2

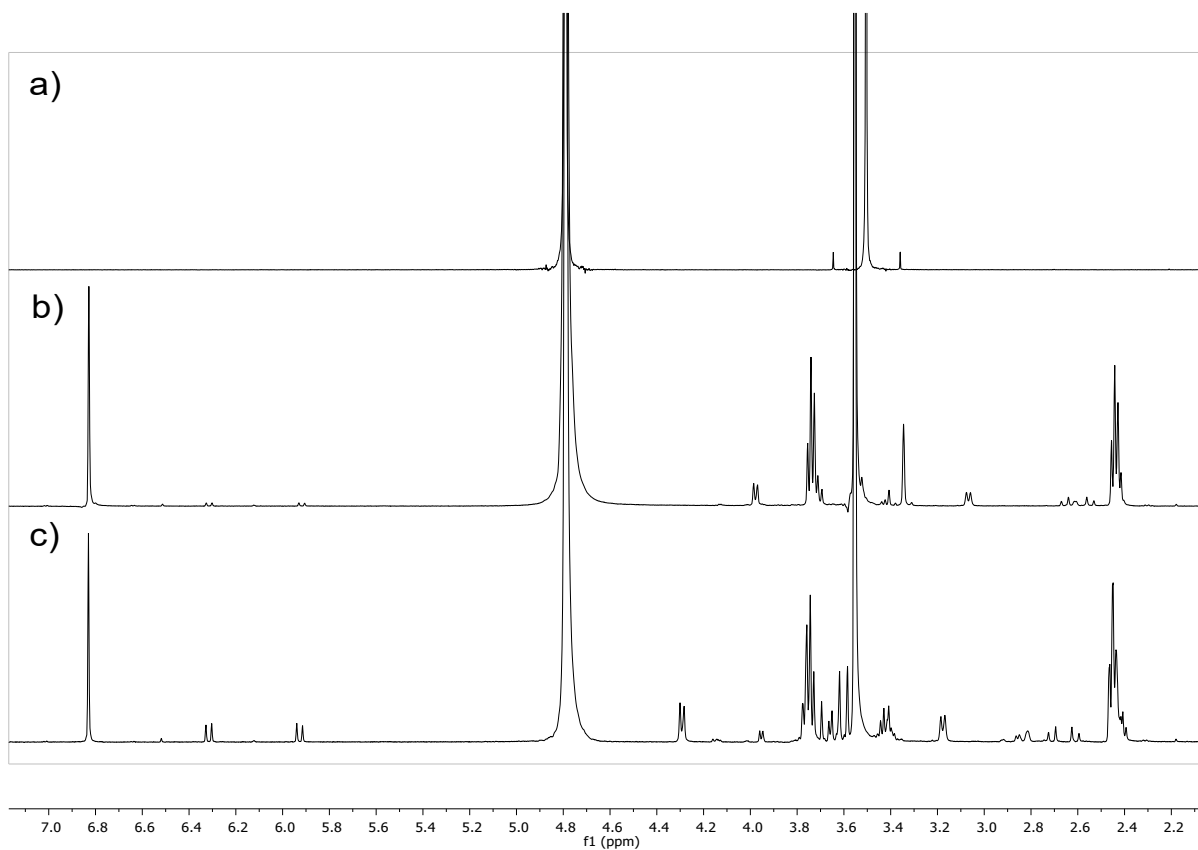

**Figure S13:** <sup>1</sup>H NMR spectra (500 MHz, D<sub>2</sub>O) of (a) glycine NaOH buffer (100 mM, pH 8.7) and maleimide **2** after (b) 1 and (c) 24 h in the buffer at 21 ± 1 °C.

### 2.1.14 CAPS pH 10.1

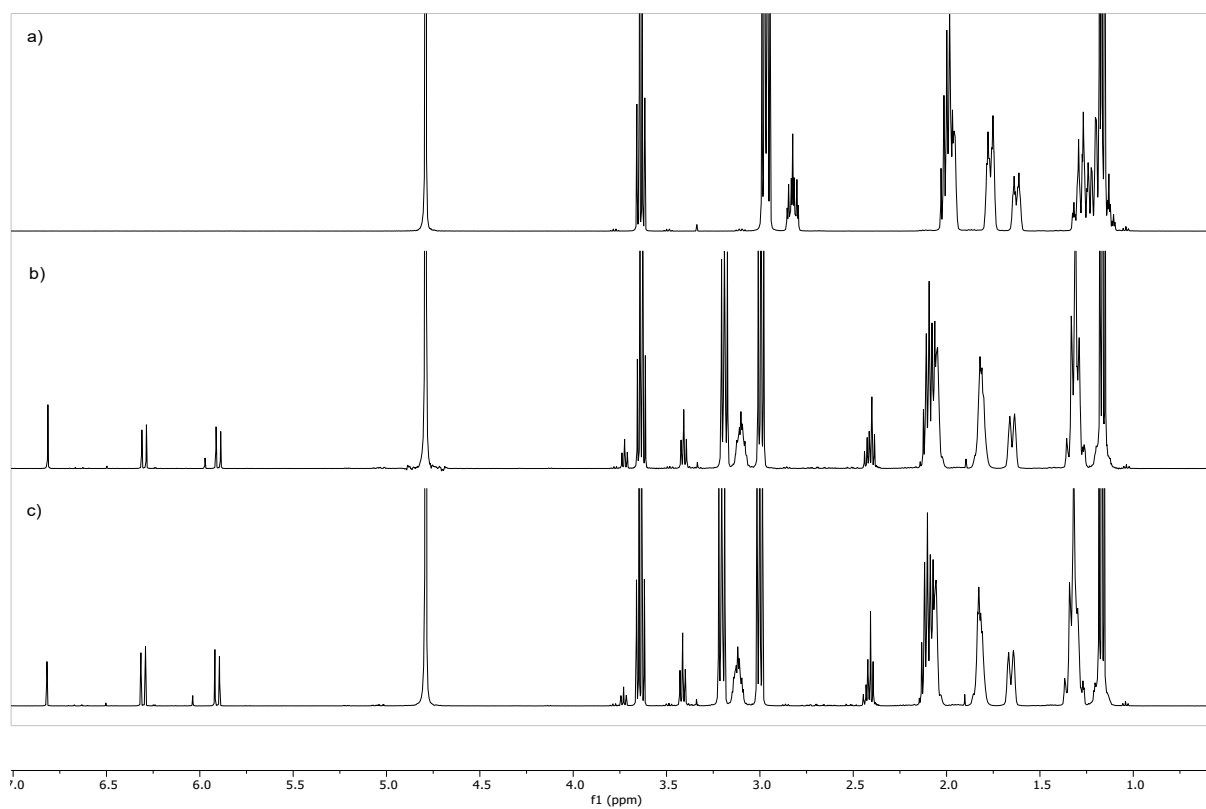

**Figure S14:** <sup>1</sup>H NMR spectra (500 MHz, D<sub>2</sub>O) of (a) CAPS buffer (100 mM, pH 10.1) and maleimide **2** after (b) 1 and (c) 24 h in the buffer at 21 ± 1 °C.

## 2.2 Fulvene Stability

### 2.2.1 Glycine HCl pH 3.7

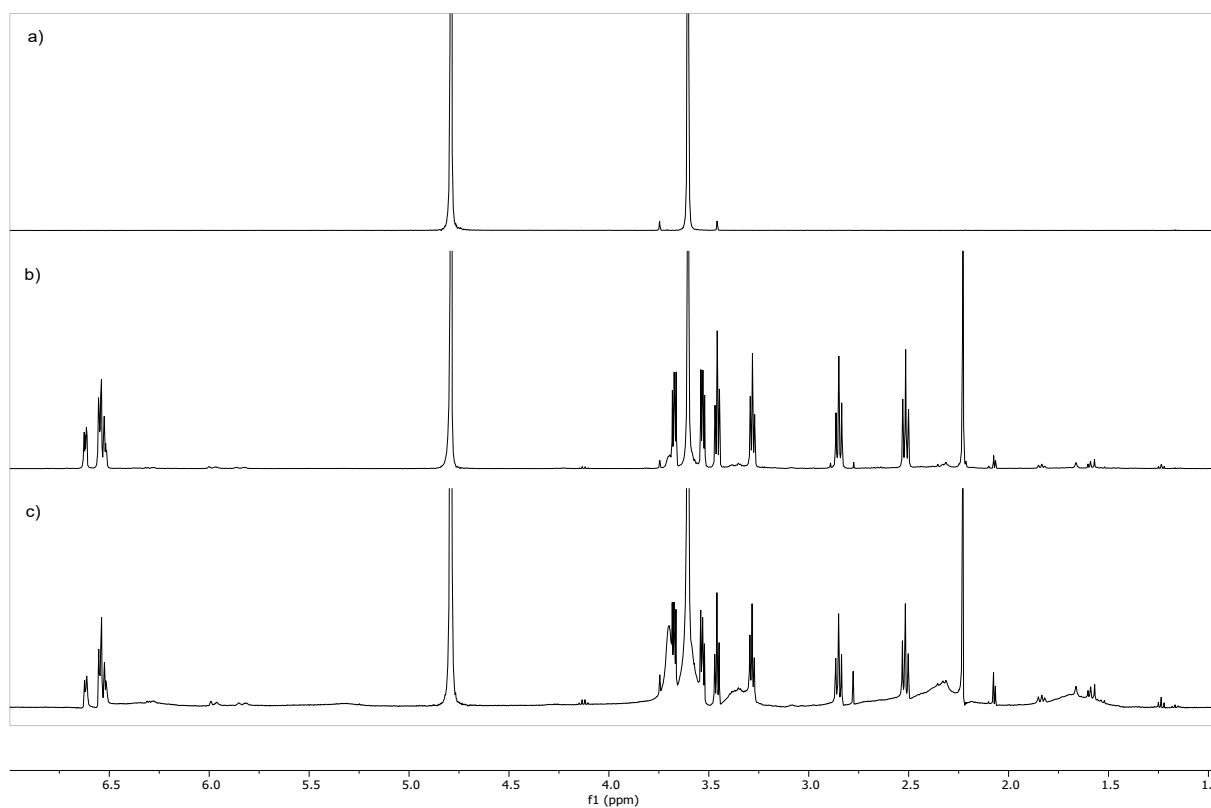

**Figure S15:** <sup>1</sup>H NMR spectra (500 MHz, D<sub>2</sub>O) of (a) glycine HCl buffer (100 mM, pH 3.7) and pentafulvene **1** after (b) 1 and (c) 24 h in the buffer at 21 ± 1 °C.

## 2.2.2 MES pH 5.5

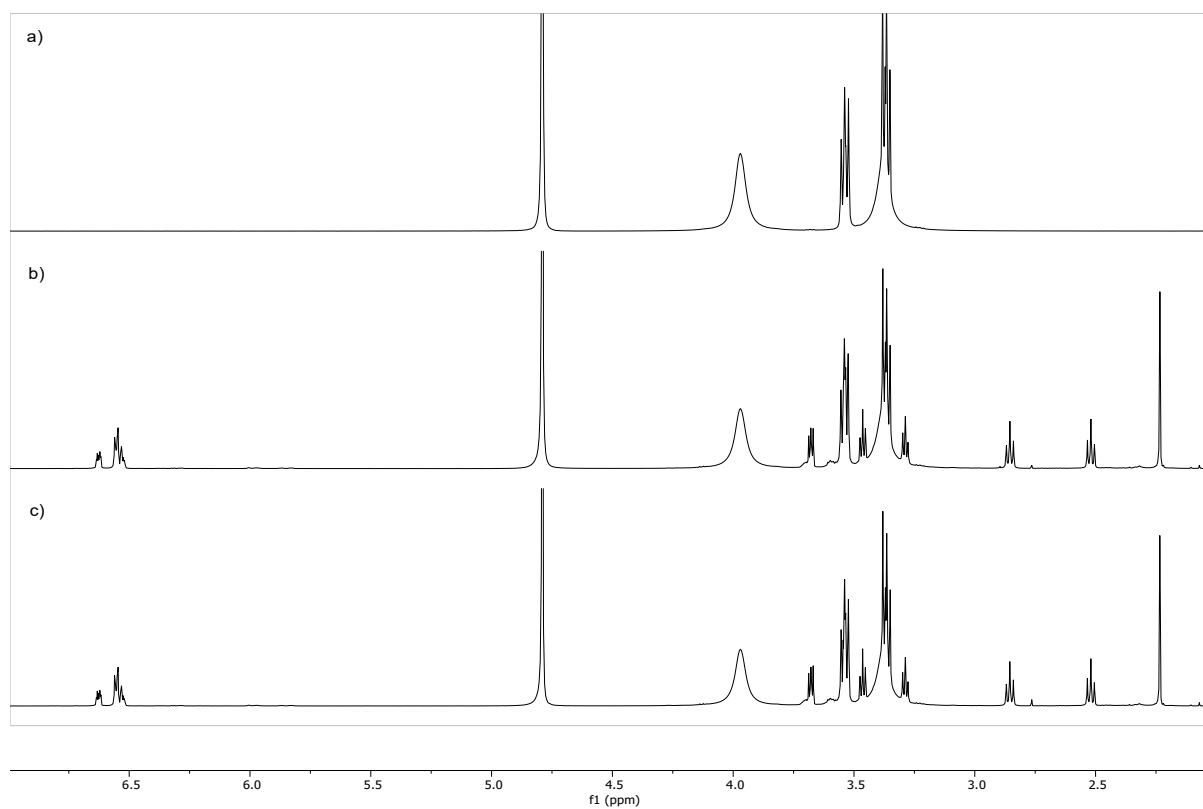

**Figure S16:**  $^1\text{H}$  NMR spectra (500 MHz,  $\text{D}_2\text{O}$ ) of (a) MES buffer (100 mM, pH 5.5) and pentafulvene **1** after (b) 1 and (c) 24 h in the buffer at  $21 \pm 1$  °C.

### 2.2.3 BTM pH 6.4

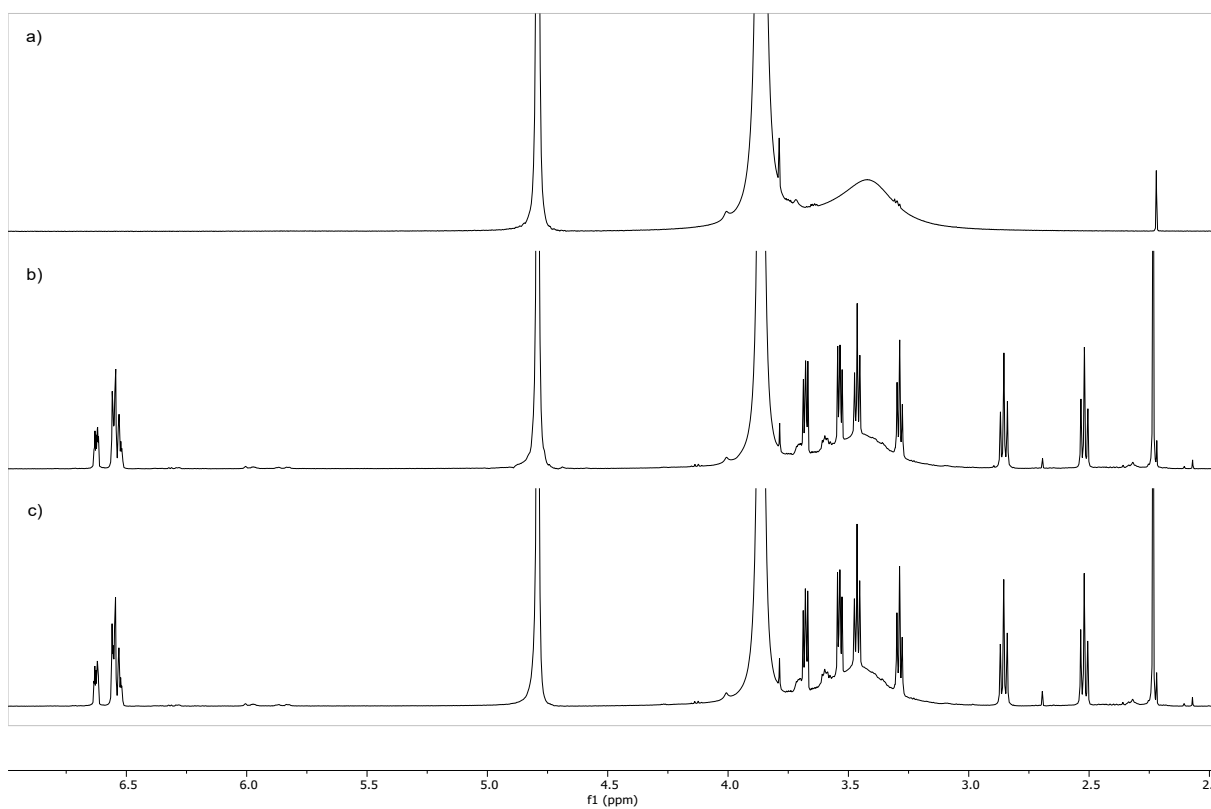

**Figure S17:**  $^1\text{H}$  NMR spectra (500 MHz,  $\text{D}_2\text{O}$ ) of (a) BTM buffer (100 mM, pH 6.4) and pentafulvene **1** after (b) 1 and (c) 24 h in the buffer at  $21 \pm 1$  °C.

## 2.2.4 BTP pH 6.9

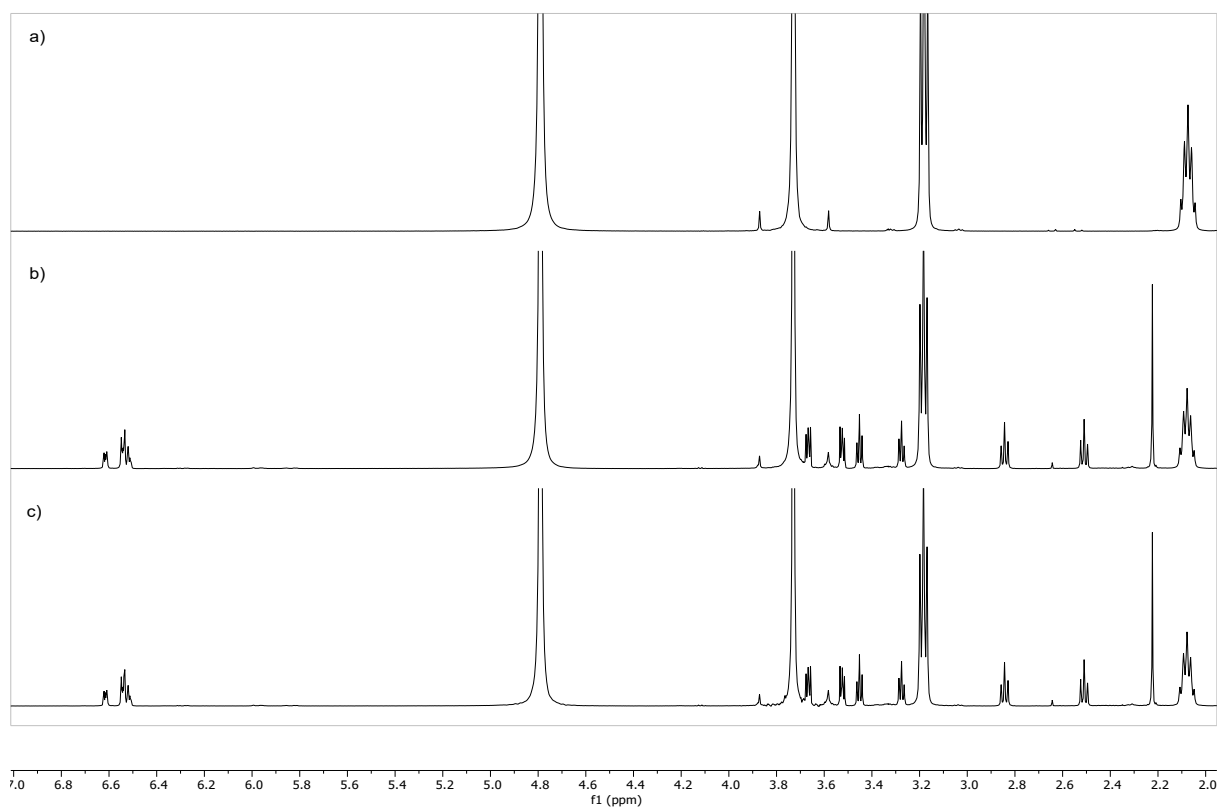

**Figure S18:** <sup>1</sup>H NMR spectra (500 MHz, D<sub>2</sub>O) of (a) BTP buffer (100 mM, pH 6.9) and pentafulvene **1** after (b) 1 and (c) 24 h in the buffer at 21 ± 1 °C.



## 2.2.5 Imidazole HCl pH 6.9

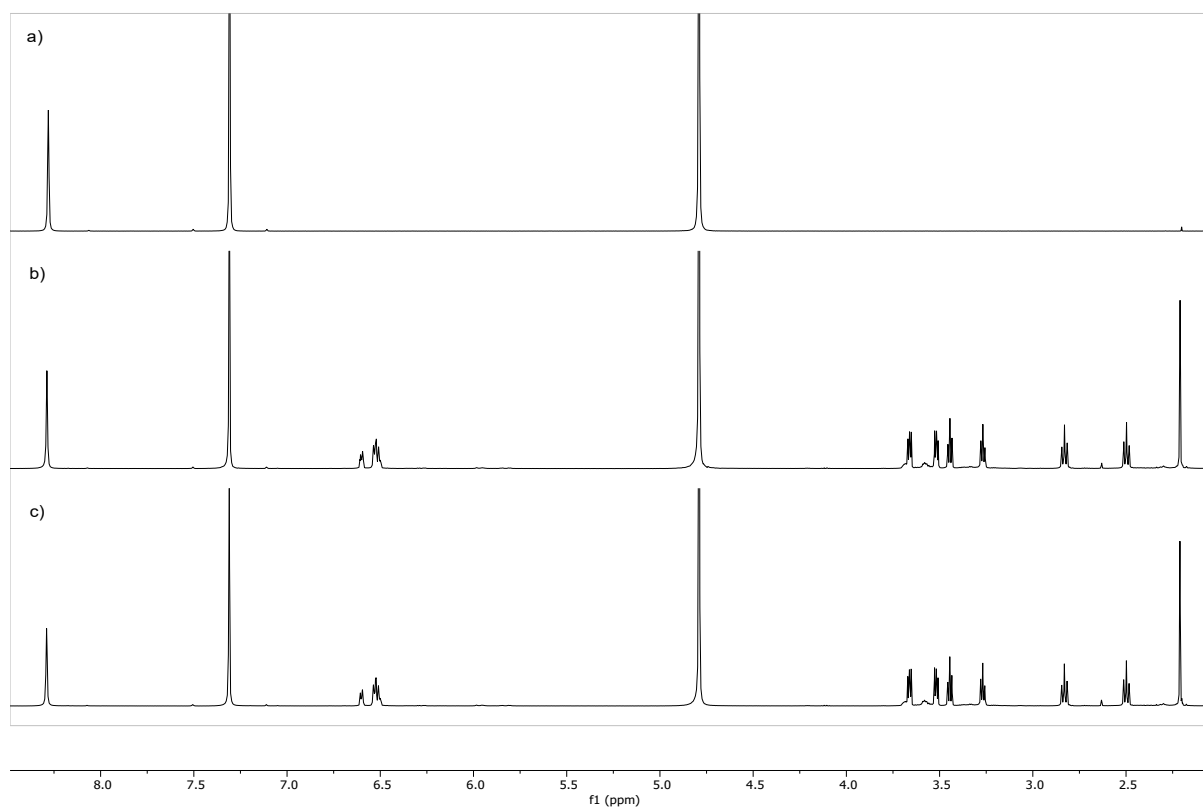

**Figure S19:** <sup>1</sup>H NMR spectra (500 MHz, D<sub>2</sub>O) of (a) imidazole HCl buffer (100 mM, pH 6.9) and pentafulvene **1** after (b) 1 and (c) 24 h in the buffer at 21 ± 1 °C.

## 2.2.6 PIPES pH 6.9

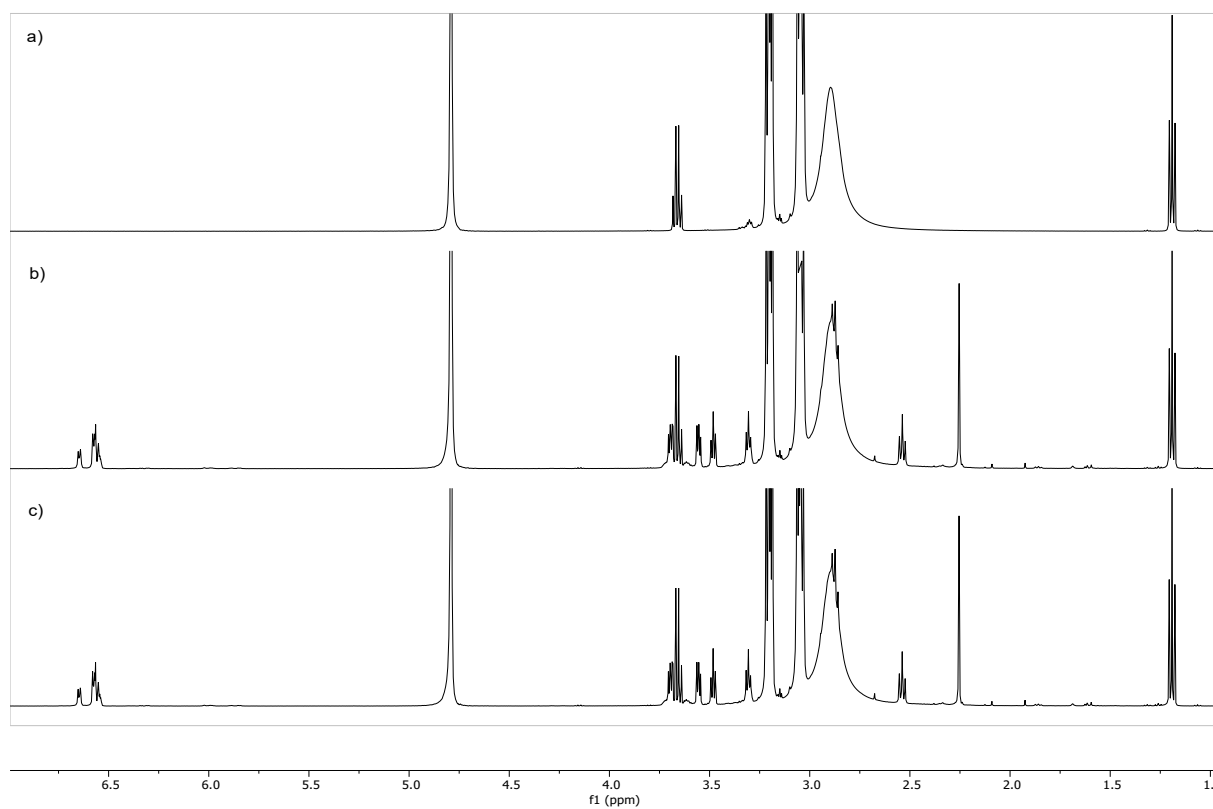

**Figure S20:**  $^1\text{H}$  NMR spectra (500 MHz,  $\text{D}_2\text{O}$ ) of (a) PIPES buffer (100 mM, pH 6.9) and pentafulvene **1** after (b) 1 and (c) 24 h in the buffer at  $21 \pm 1$  °C.

## 2.2.7 Deuterium oxide pH 7.1

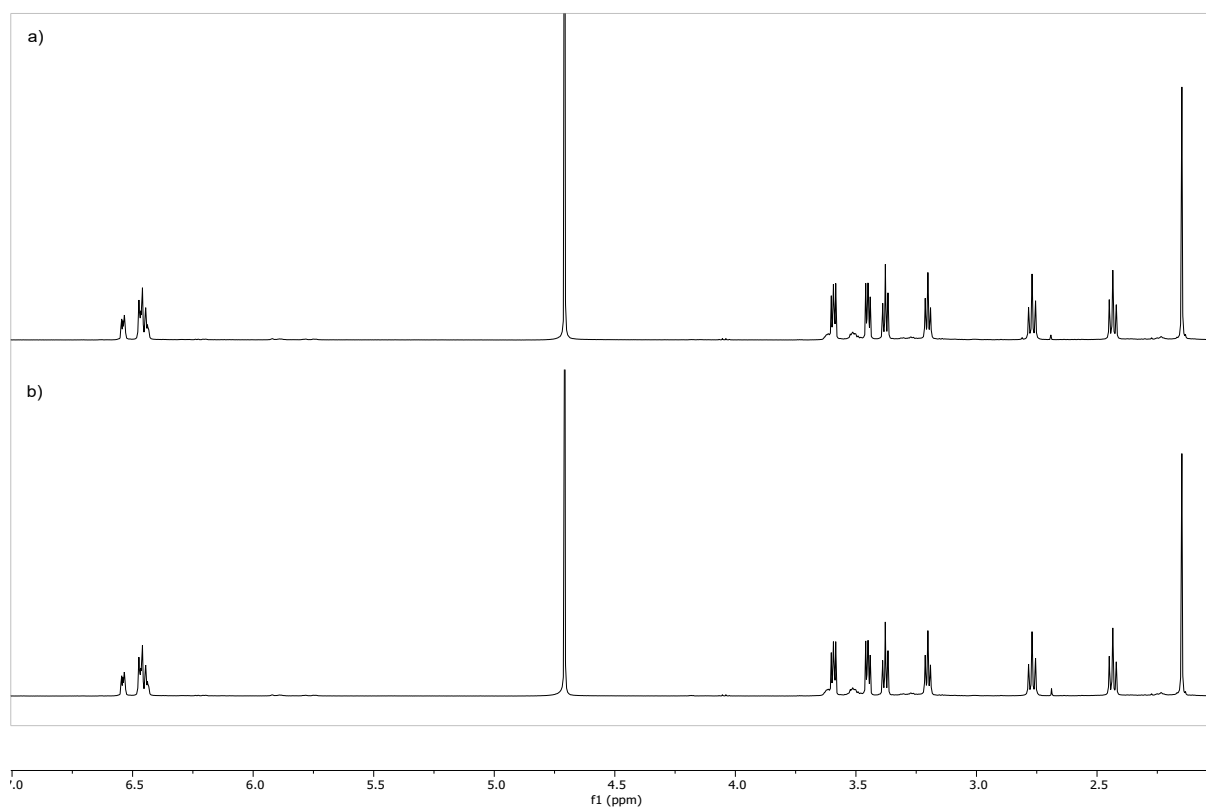

**Figure S21:**  $^1\text{H}$  NMR spectra (500 MHz,  $\text{D}_2\text{O}$ ) showing the stability of pentafulvene **1** in  $\text{D}_2\text{O}$  (pH 7.1) over (a) 1 and (b) 24 h at  $21 \pm 1$  °C.

## 2.2.8 PBS pH 7.3

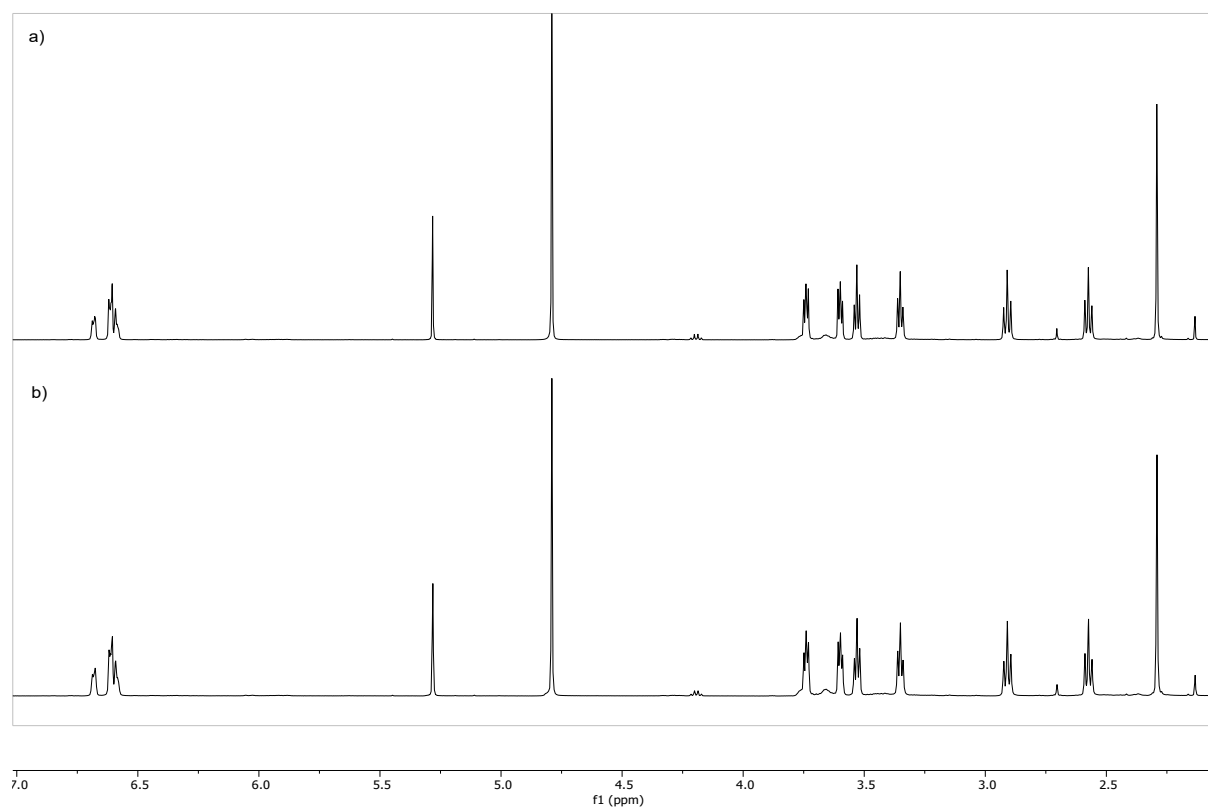

**Figure S22:**  $^1\text{H}$  NMR spectra (500 MHz,  $\text{D}_2\text{O}$ ) of (a) PBS buffer (100 mM, pH 7.3) and pentafulvene **1** after (b) 1 and (c) 24 h in the buffer at  $21 \pm 1$   $^\circ\text{C}$ .

## 2.2.9 HEPES pH 7.4

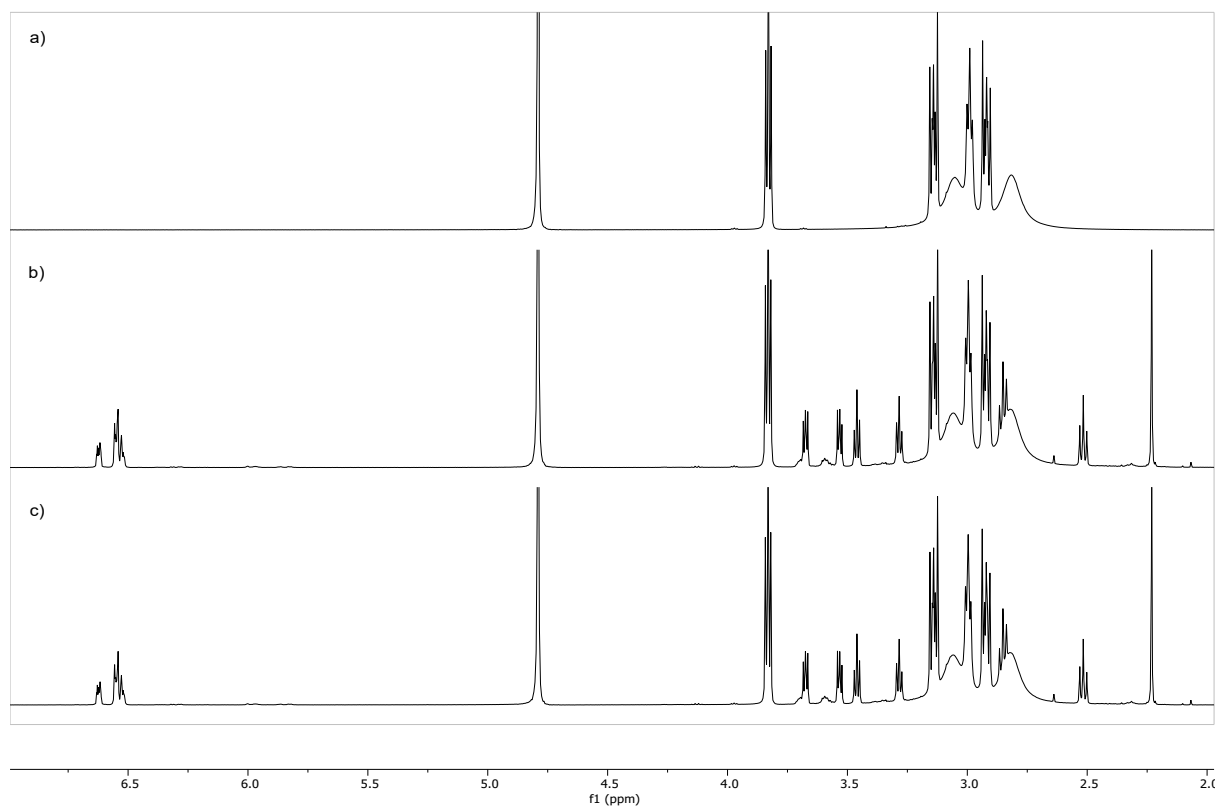

**Figure S23:**  $^1\text{H}$  NMR spectra (500 MHz,  $\text{D}_2\text{O}$ ) of (a) HEPES buffer (100 mM, pH 7.4) and pentafulvene **1** after (b) 1 and (c) 24 h in the buffer at  $21 \pm 1$  °C.

## 2.2.10 Trizma pH 7.4

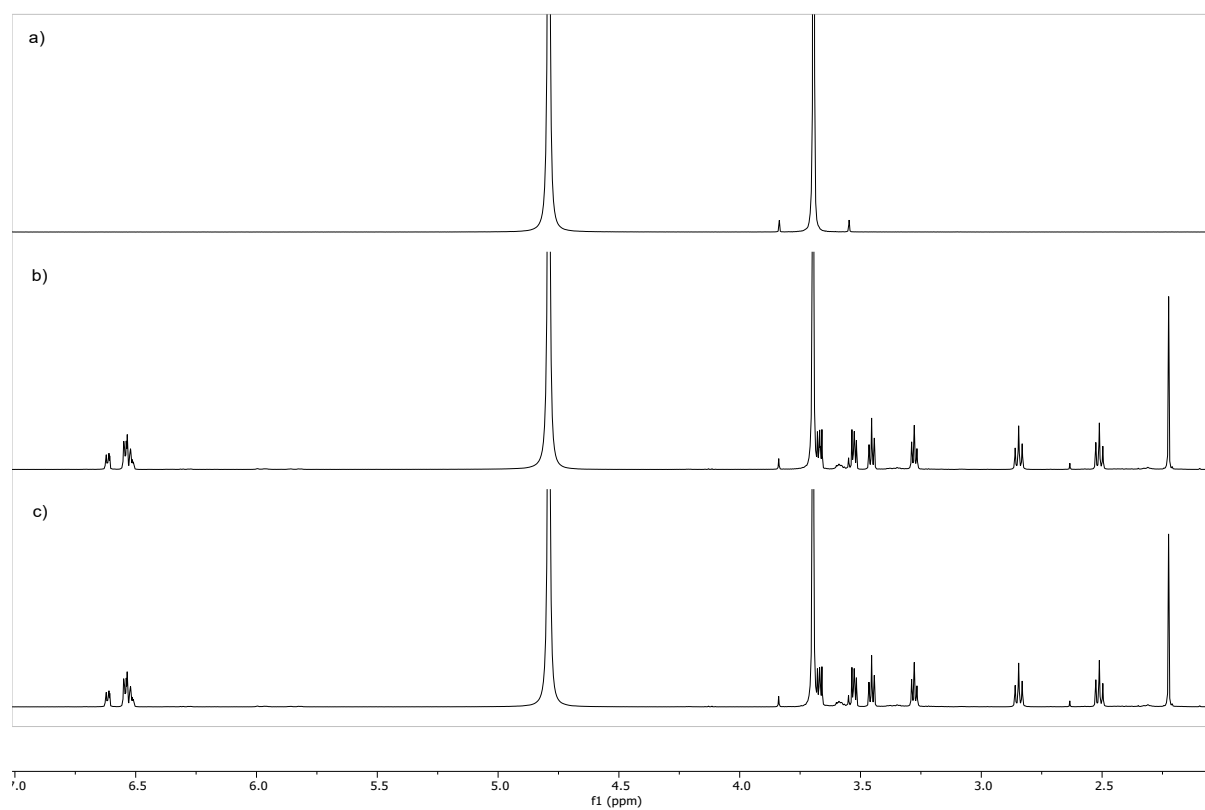

**Figure S24:**  $^1\text{H}$  NMR spectra (500 MHz,  $\text{D}_2\text{O}$ ) of (a) Trizma buffer (100 mM, pH 7.4) and pentafulvene **1** after (b) 1 and (c) 24 h in the buffer at  $21 \pm 1$  °C.

## 2.2.11 Tricine pH 8.0

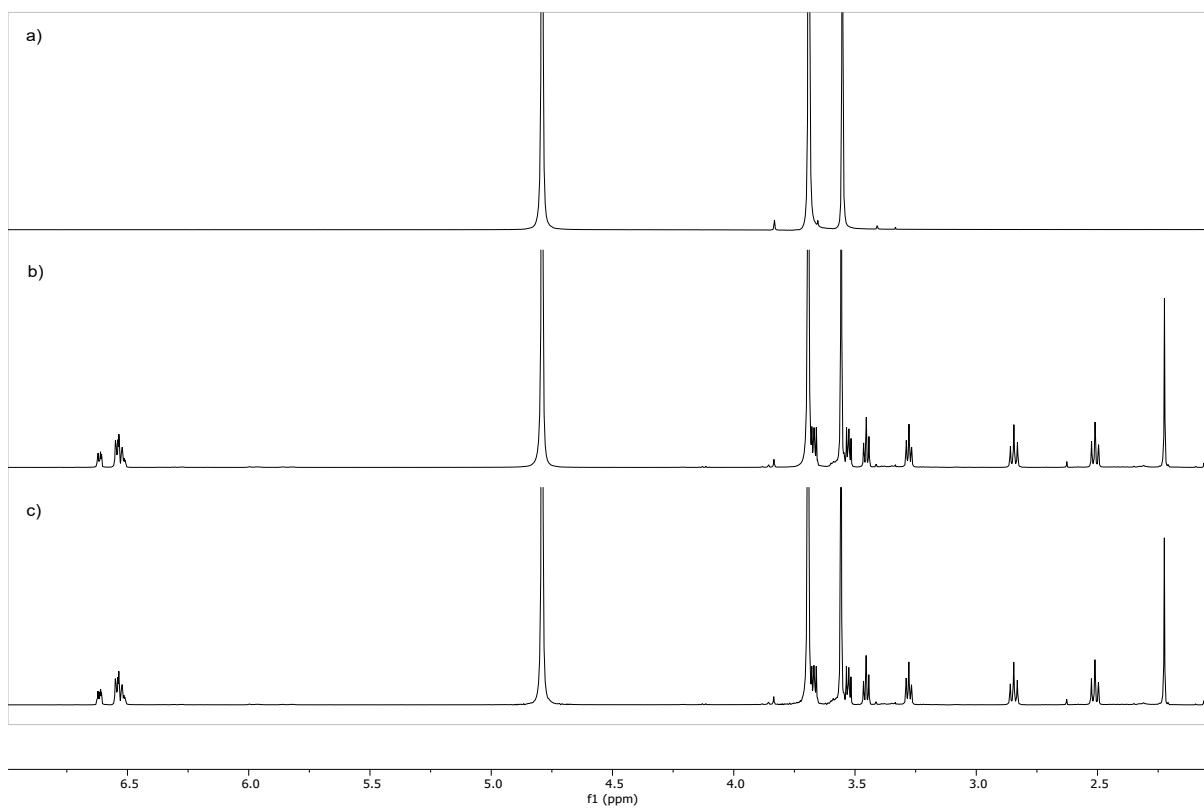

**Figure S25:**  $^1\text{H}$  NMR spectra (500 MHz,  $\text{D}_2\text{O}$ ) of (a) Tricine buffer (100 mM, pH 8.0) and pentafulvene **1** after (b) 1 and (c) 24 h in the buffer at  $21 \pm 1$  °C.

## 2.2.12 Bicine pH 8.1

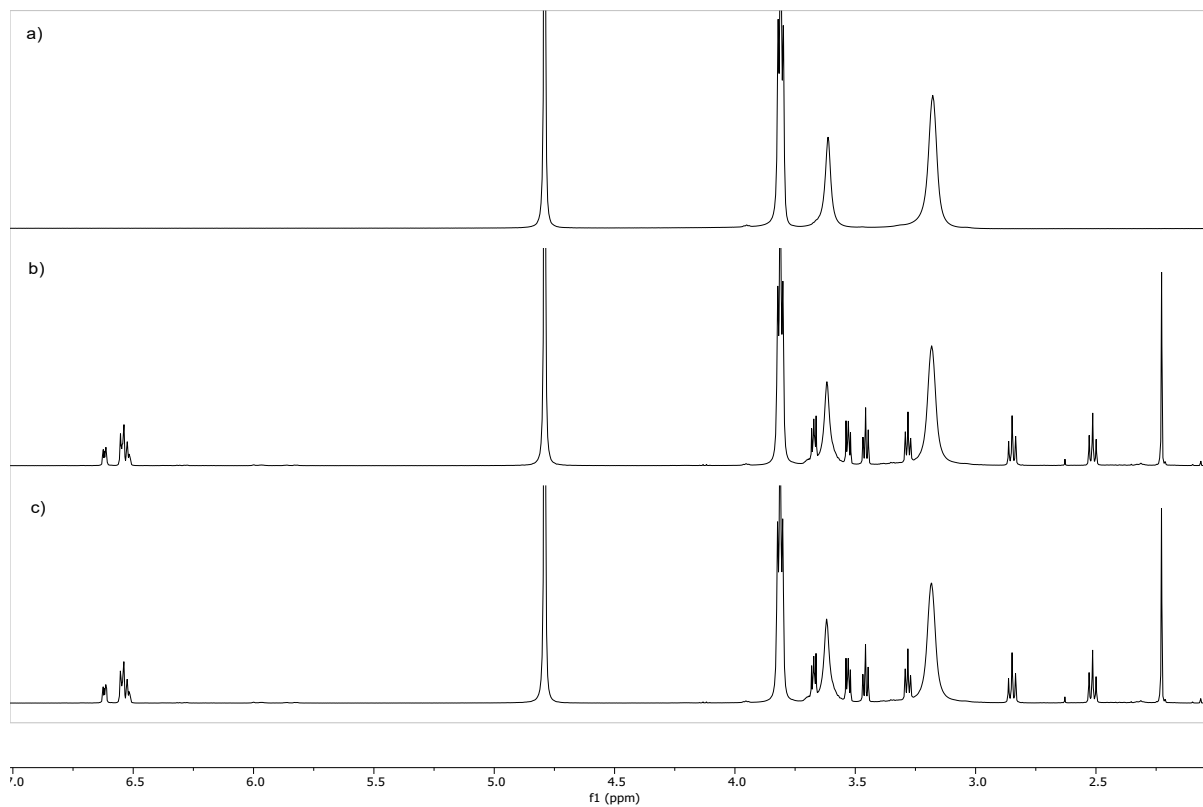

**Figure S26:** <sup>1</sup>H NMR spectra (500 MHz, D<sub>2</sub>O) of (a) Bicine buffer (100 mM, pH 8.1) and pentafulvene **1** after (b) 1 and (c) 24 h in the buffer at 21 ± 1 °C.



### 2.2.13 Glycine NaOH pH 8.7

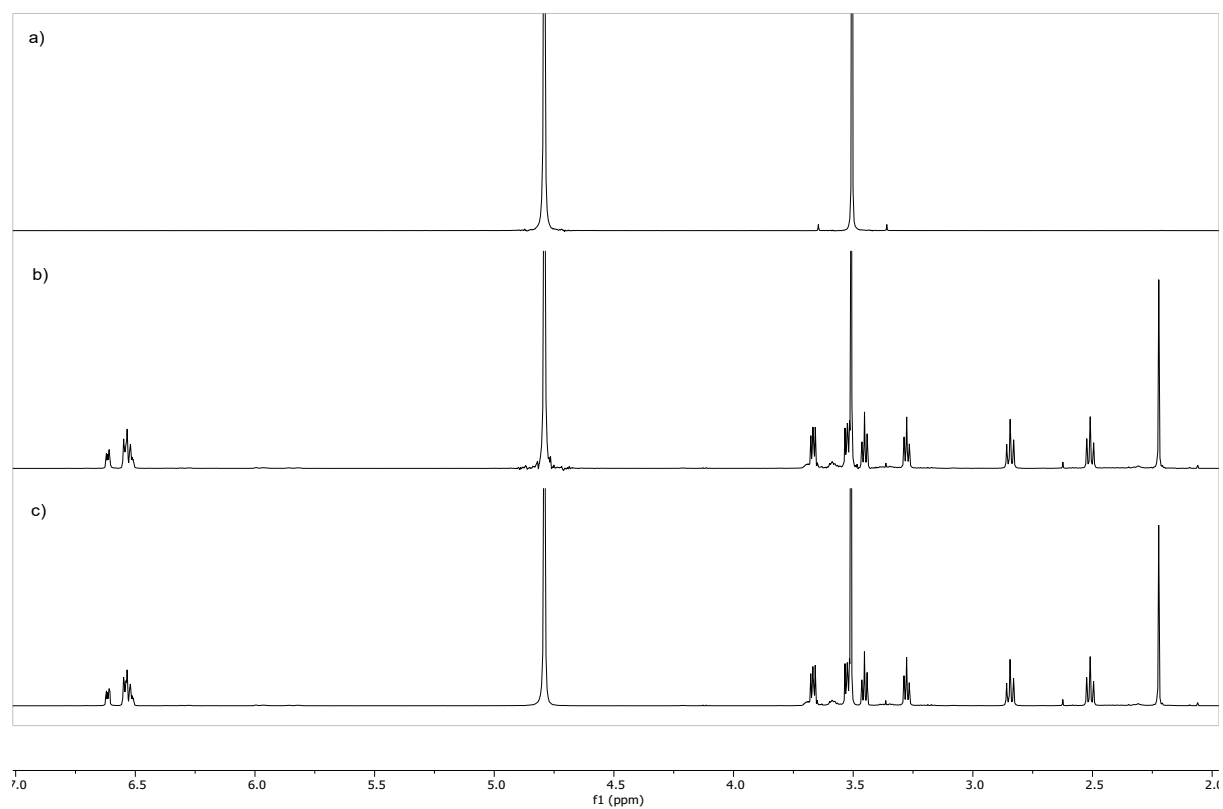

**Figure S27:**  $^1\text{H}$  NMR spectra (500 MHz,  $\text{D}_2\text{O}$ ) of (a) glycine NaOH buffer (100 mM, pH 8.7) and pentafulvene **1** after (b) 1 and (c) 24 h in the buffer at  $21 \pm 1$  °C.

## 2.2.14 CAPS pH 10.1

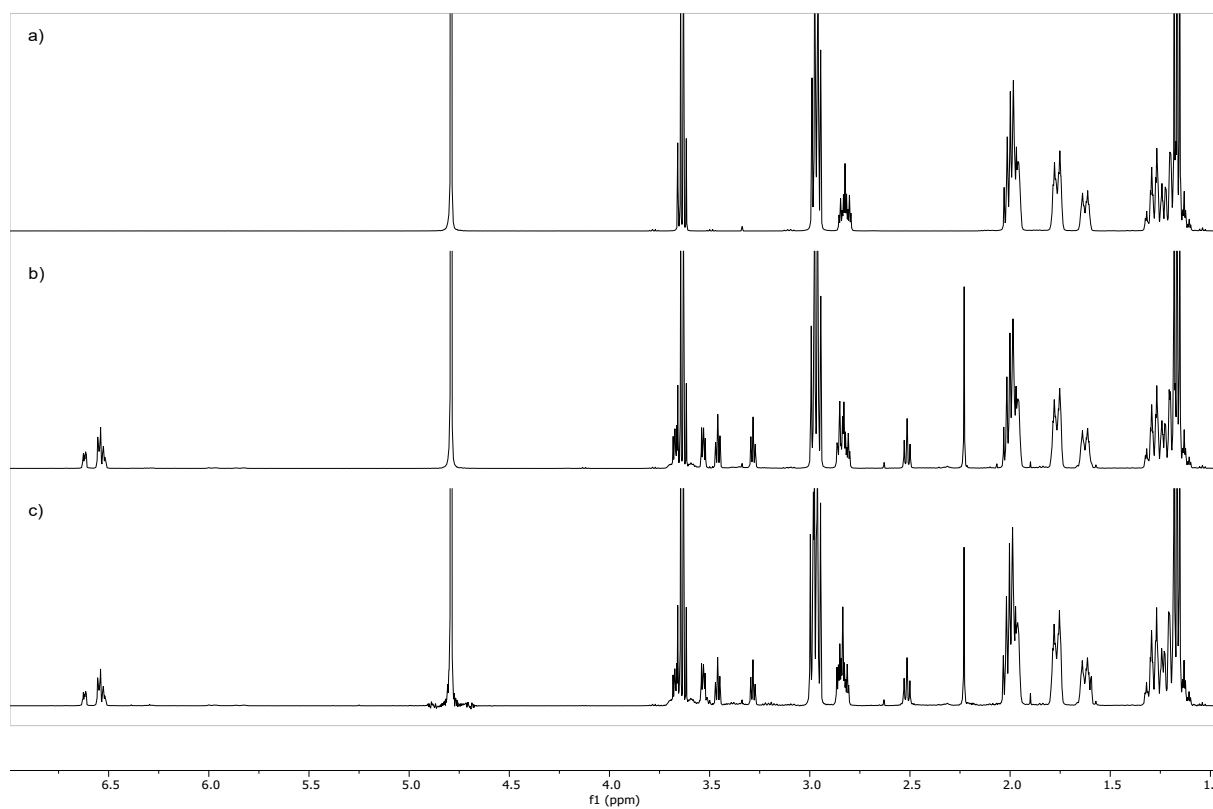

**Figure S28:** <sup>1</sup>H NMR spectra (500 MHz, D<sub>2</sub>O) of (a) CAPS buffer (100 mM, pH 10.1) and pentafulvene **1** after (b) 1 and (c) 24 h in the buffer at 21 ± 1 °C.

### 3 Kinetic Studies

#### 3.1 Glycine HCl pH 3.5

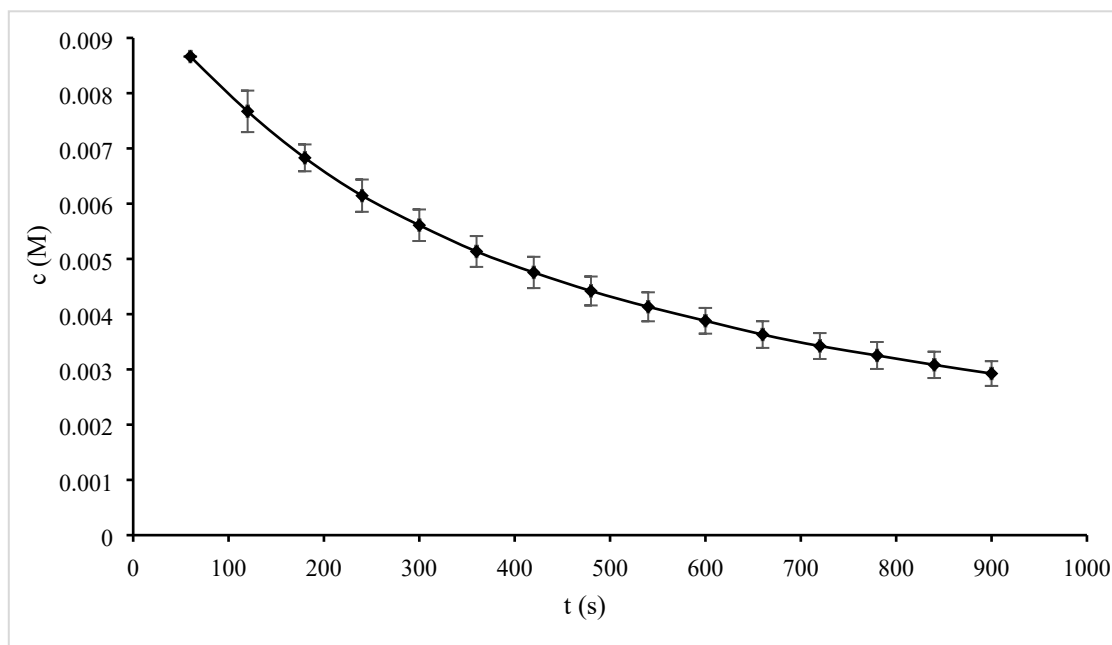

**Figure S29:** Concentration of pentafulvene **1** versus time for the reaction between **1** and **2** in glycine HCl buffer (100 mM, pH 3.5). Timepoints taken at 1 min intervals over a 15 min period as monitored *via* HPLC at  $23 \pm 1$  °C ( $n = 3$ ).

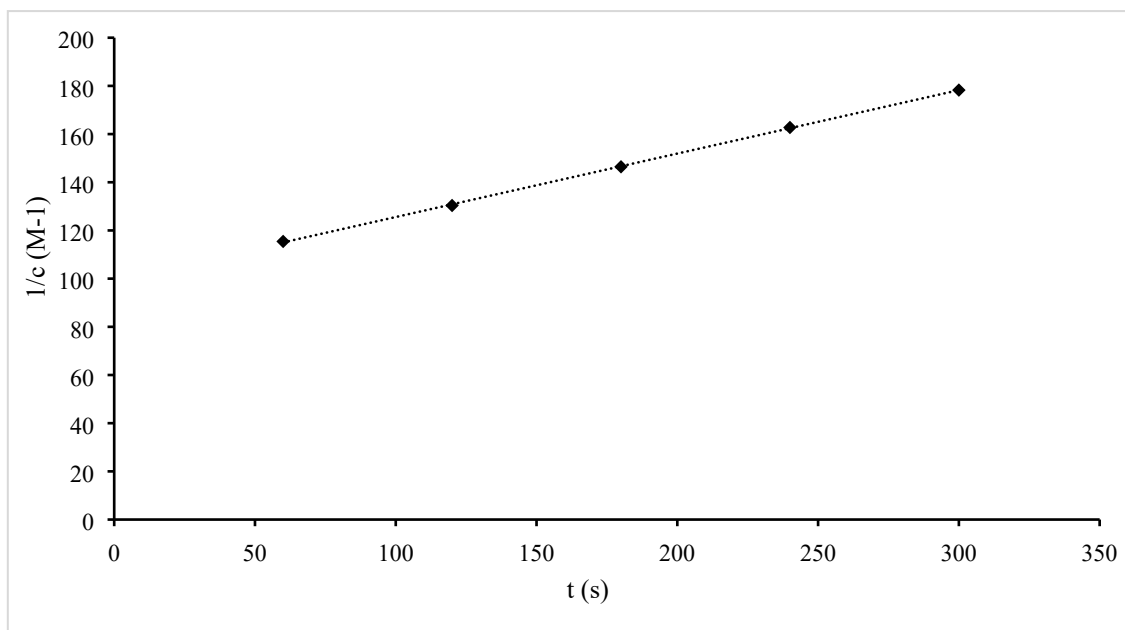

**Figure S30:** Second order kinetic plot for the reaction between **1** and **2** in glycine HCl buffer (100 mM, pH 3.5,  $23 \pm 1$  °C);  $k_2 = 0.26 \pm 0.02$  M<sup>-1</sup>s<sup>-1</sup>.

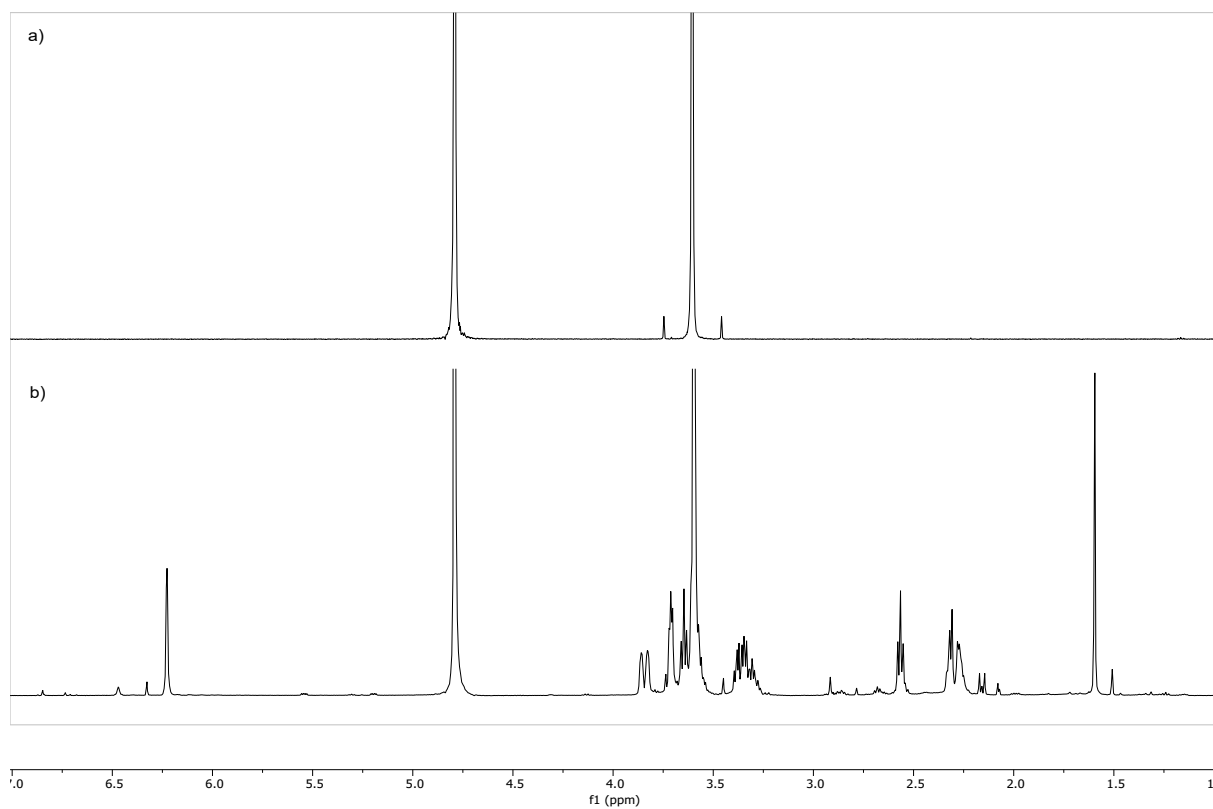

**Figure S31:**  $^1\text{H}$  NMR spectra (500 MHz,  $\text{D}_2\text{O}$ ) showing (a) glycine HCl buffer and (b) cycloadduct products from kinetic experiments.

### 3.2 MES pH 5.5

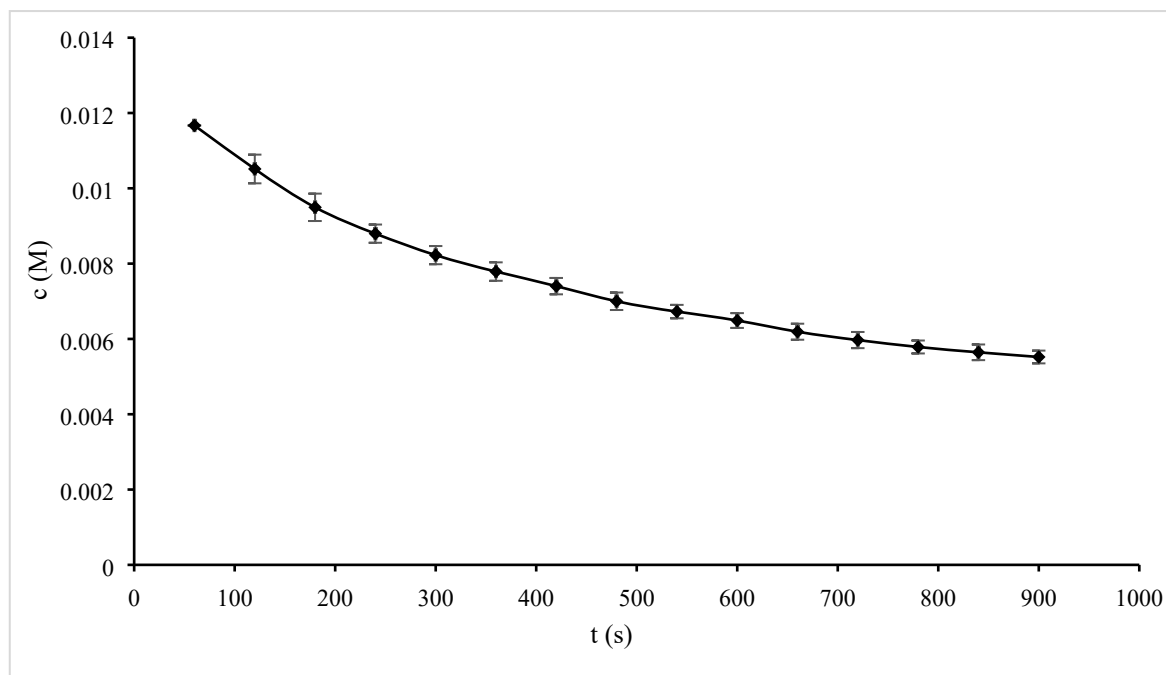

**Figure S32:** Concentration of pentafulvene **1** *versus* time for the reaction between **1** and **2** in MES buffer (100 mM, pH 5.5). Timepoints taken at 1 min intervals over a 15 min period as monitored *via* HPLC at  $23 \pm 1$  °C ( $n = 3$ ).

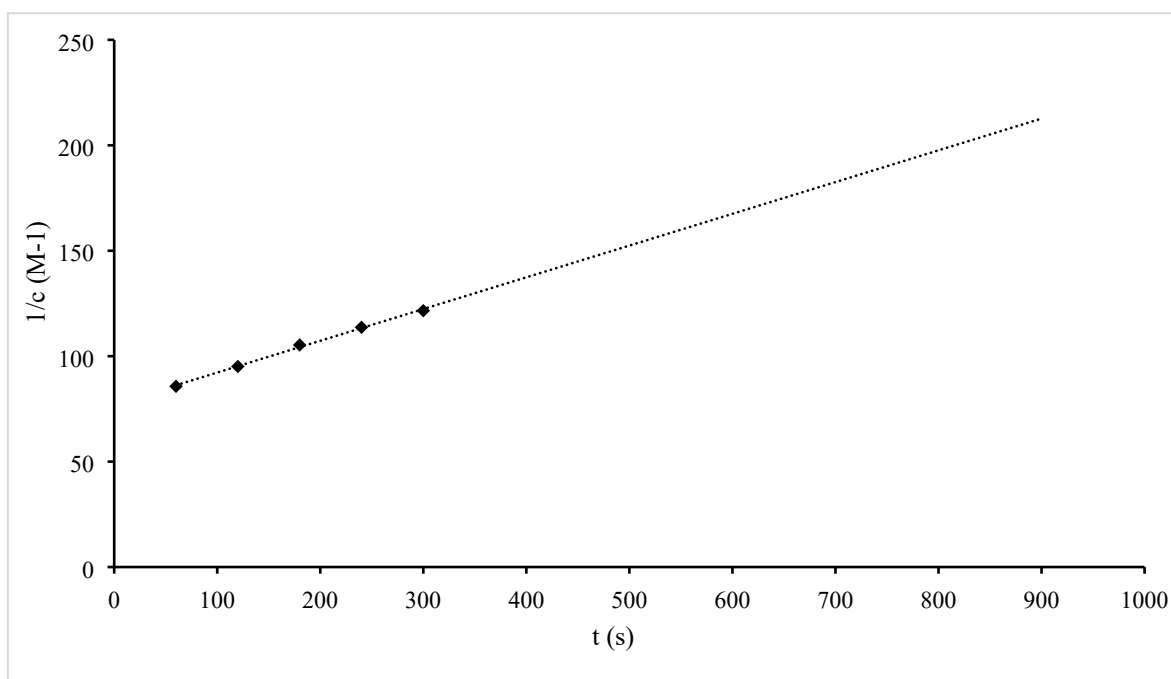

**Figure S33:** Second order kinetic plot for the reaction between **1** and **2** in MES buffer (100 mM, pH 5.5,  $23 \pm 1$  °C);  $k_2 = 0.15 \pm 0.01$  M<sup>-1</sup>s<sup>-1</sup>.

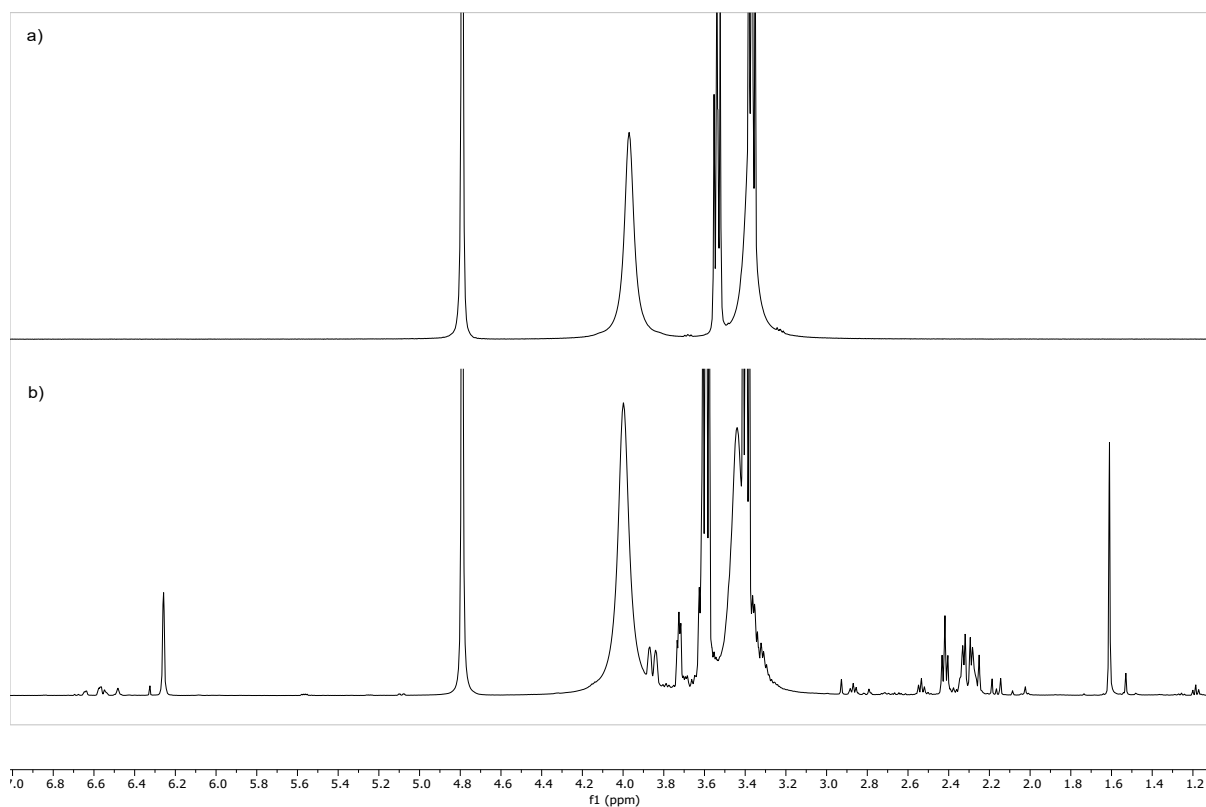

**Figure S34:**  $^1\text{H}$  NMR spectra (500 MHz,  $\text{D}_2\text{O}$ ) showing (a) MES buffer and (b) cycloadduct products from kinetic experiments.



### 3.3 BTM pH 6.5

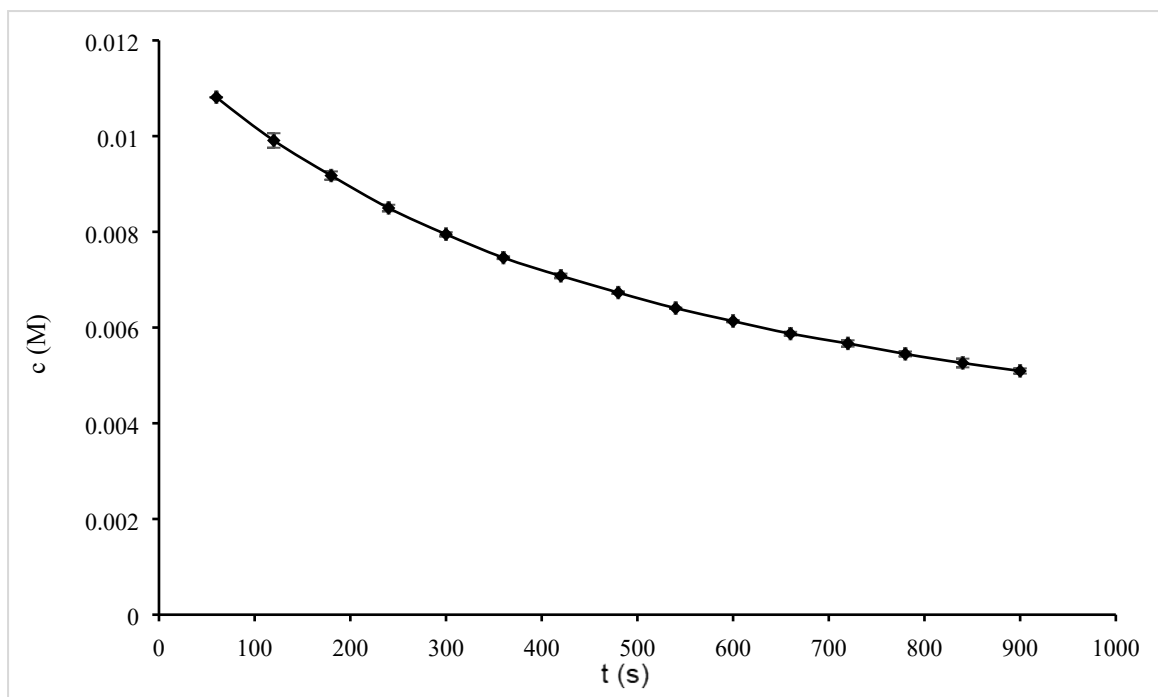

**Figure S35:** Concentration of pentafulvene **1** versus time for the reaction between **1** and **2** in BTM buffer (100 mM, pH 6.5). Timepoints taken at 1 min intervals over a 15 min period as monitored *via* HPLC at  $23 \pm 1$  °C ( $n = 3$ ).

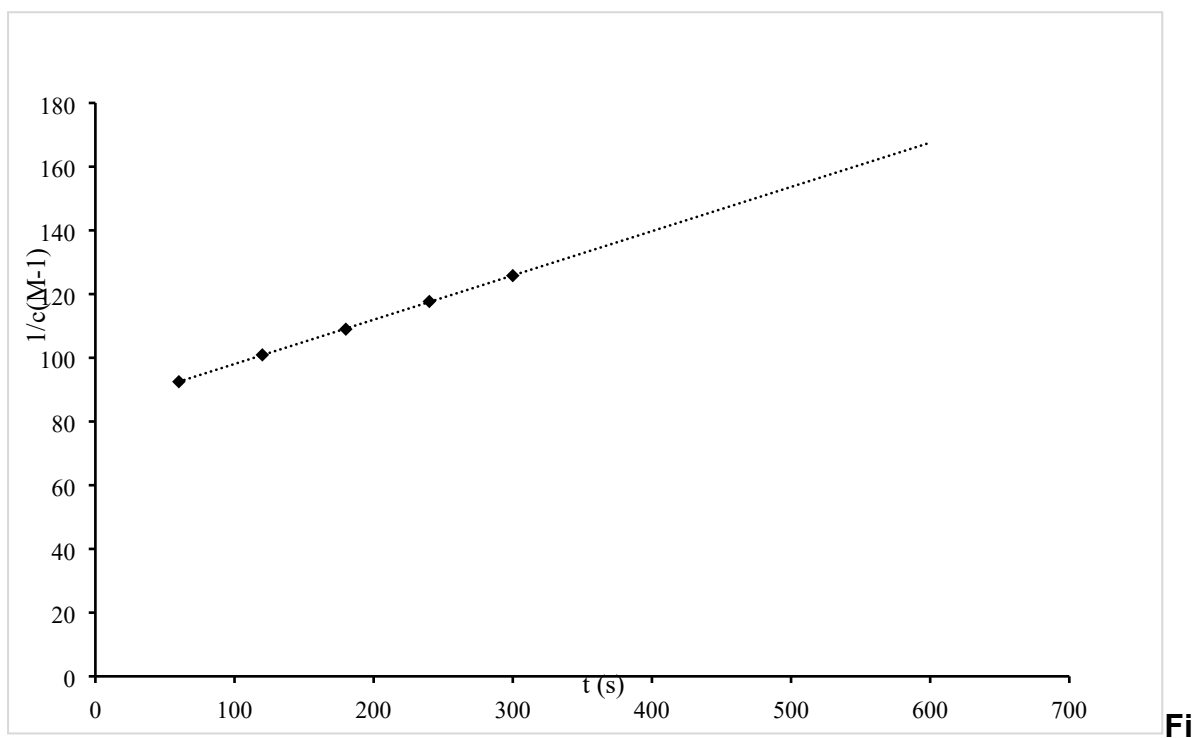

**Figure S36:** Second order kinetic plot for the reaction between **1** and **2** in BTM buffer (100 mM, pH 6.5,  $23 \pm 1$  °C);  $k_2 = 0.14 \pm 0.01 \text{ M}^{-1}\text{s}^{-1}$ .

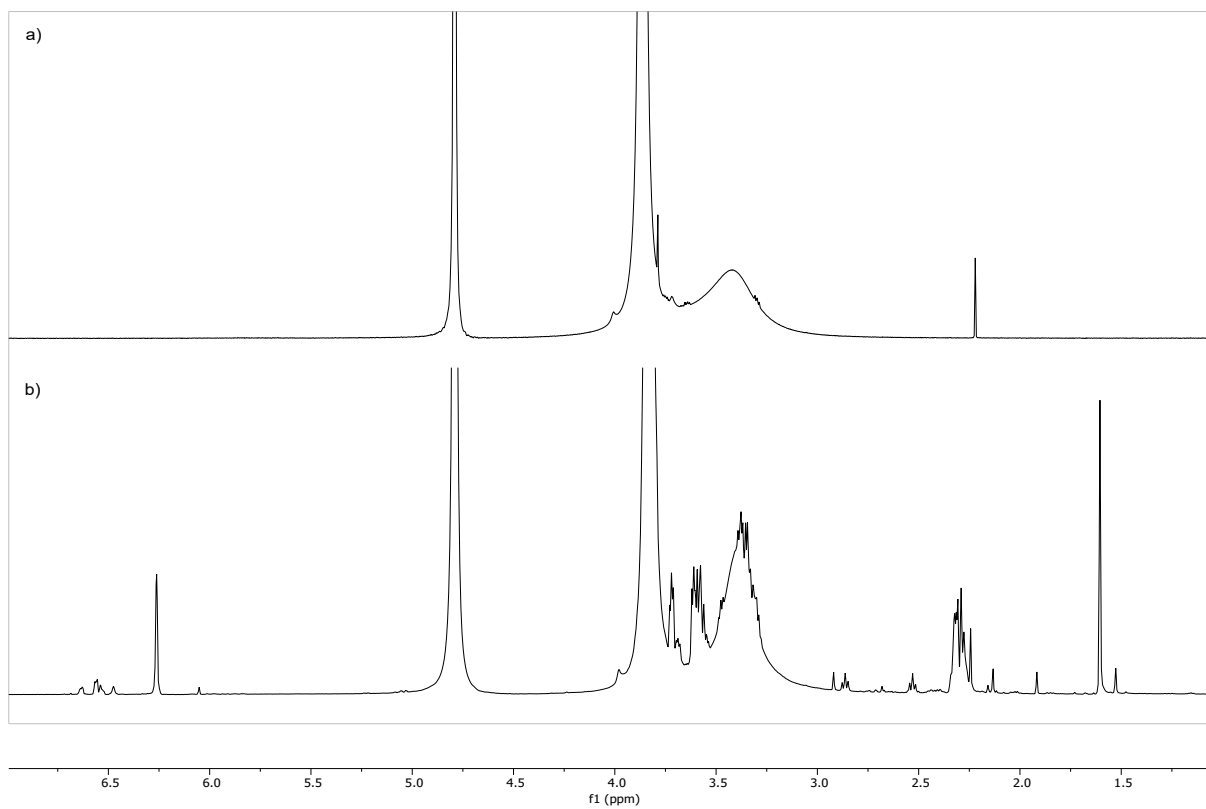

**Figure S37:** <sup>1</sup>H NMR spectra (500 MHz, D<sub>2</sub>O) showing (a) BTM buffer and (b) cycloadduct products from kinetic experiments.

### 3.4 BTP pH 7.0

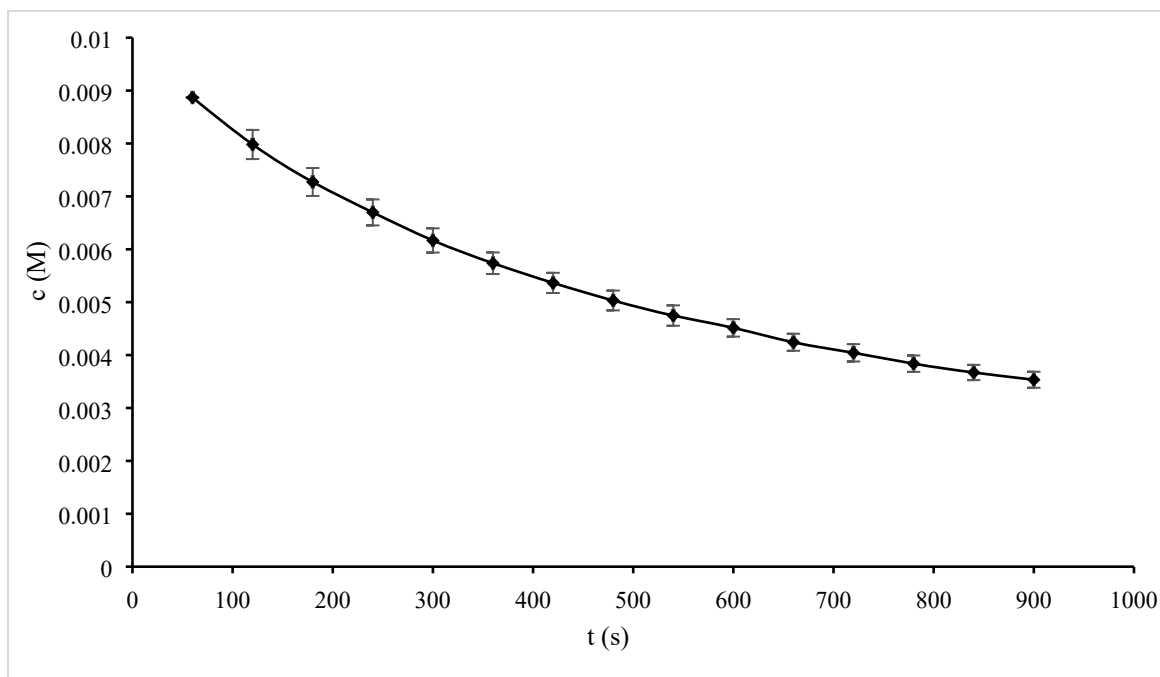

**Figure S38:** Concentration of pentafulvene **1** *versus* time for reaction between **1** and **2** in BTP buffer (100 mM, pH 7.0). Timepoints taken at 1 min intervals over a 15 min period as monitored *via* HPLC at  $23 \pm 1$  °C ( $n = 3$ ).

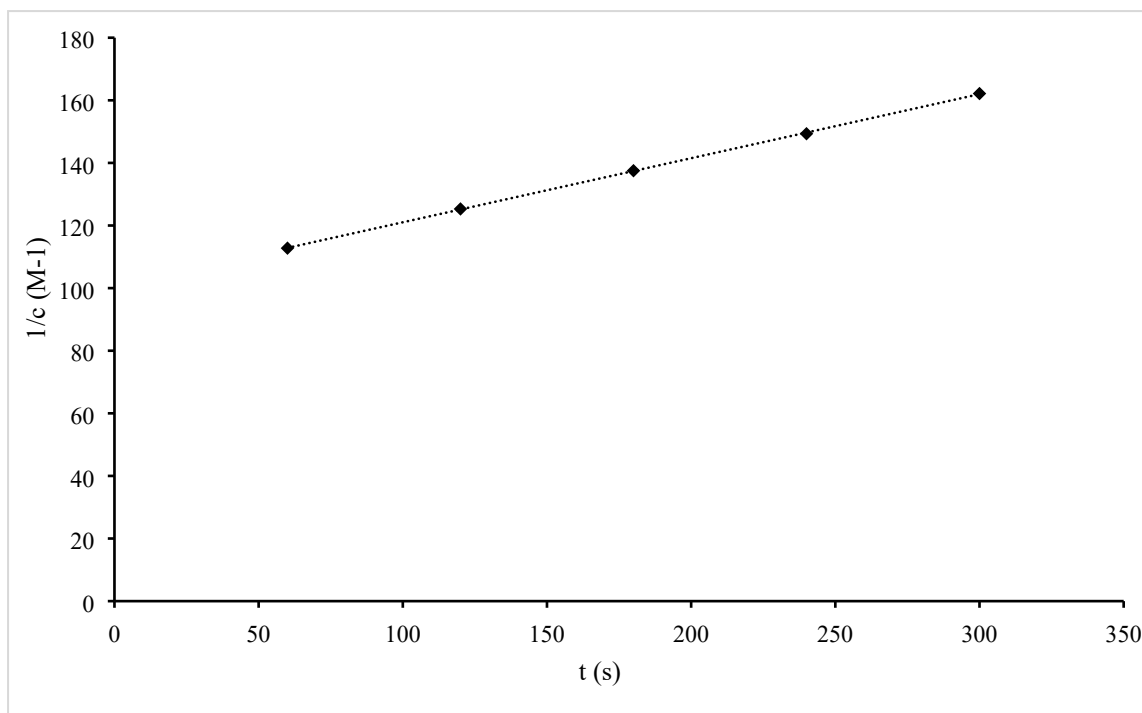

**Figure S39:** Second order kinetic plot for the reaction between **1** and **2** in BTP buffer (100 mM, pH 7.0,  $23 \pm 1$  °C);  $k_2 = 0.21 \pm 0.01$  M<sup>-1</sup>s<sup>-1</sup>.

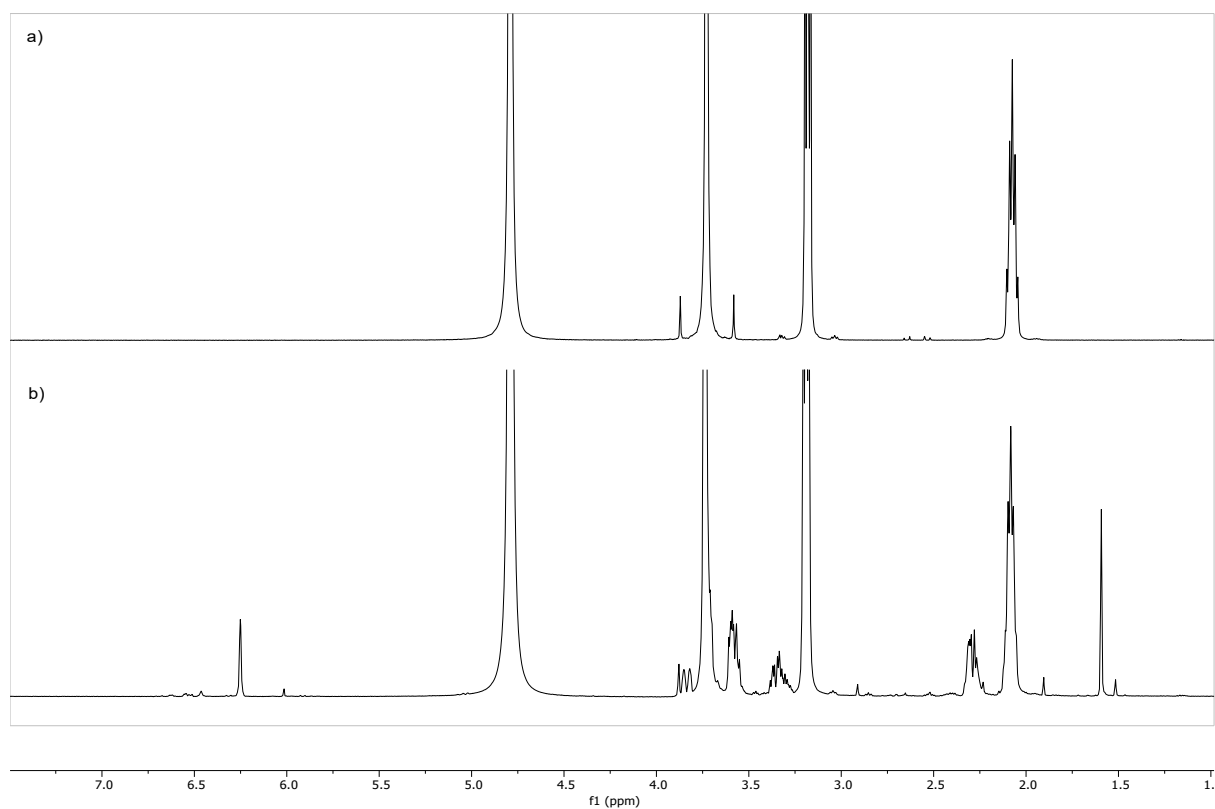

**Figure S40:** <sup>1</sup>H NMR spectra (500 MHz, D<sub>2</sub>O) showing (a) BTP buffer and (b) cycloadduct products from kinetic experiments.

### 3.5 Imidazole HCl pH 7.0

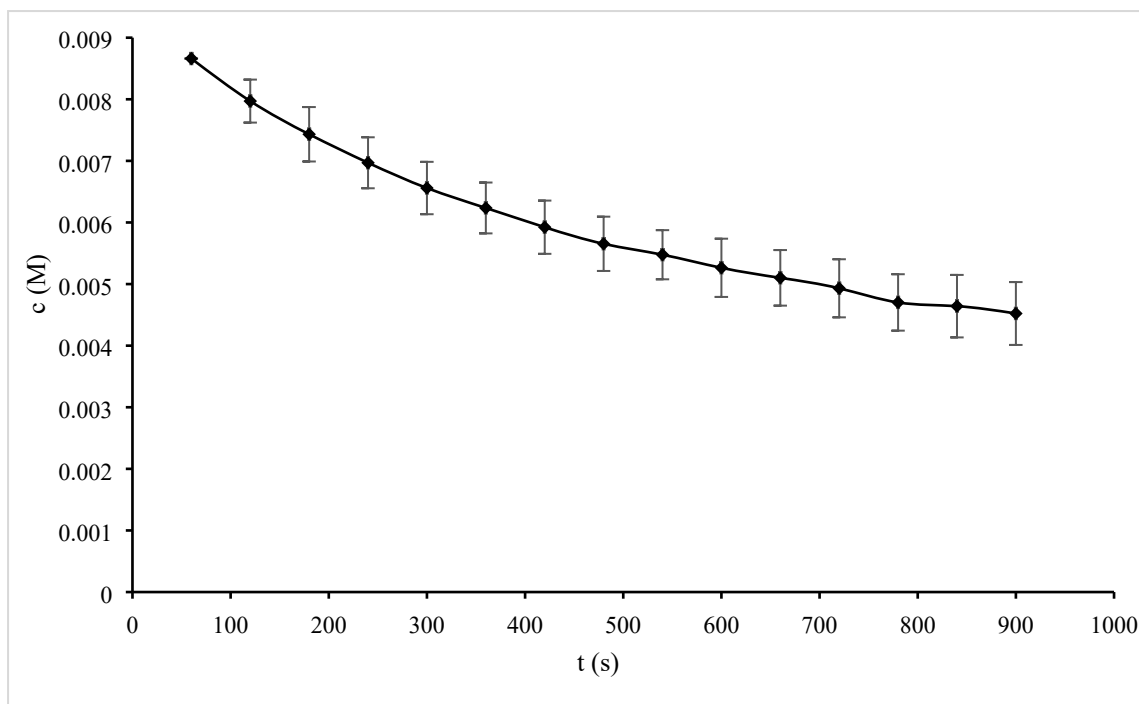

**Figure S41:** Concentration of pentafulvene **1** versus time for reaction between **1** and **2** in imidazole HCl buffer (100 mM, pH 7.0). Timepoints taken at 1 min intervals over a 15 min period as monitored *via* HPLC at  $23 \pm 1$  °C ( $n = 3$ ).

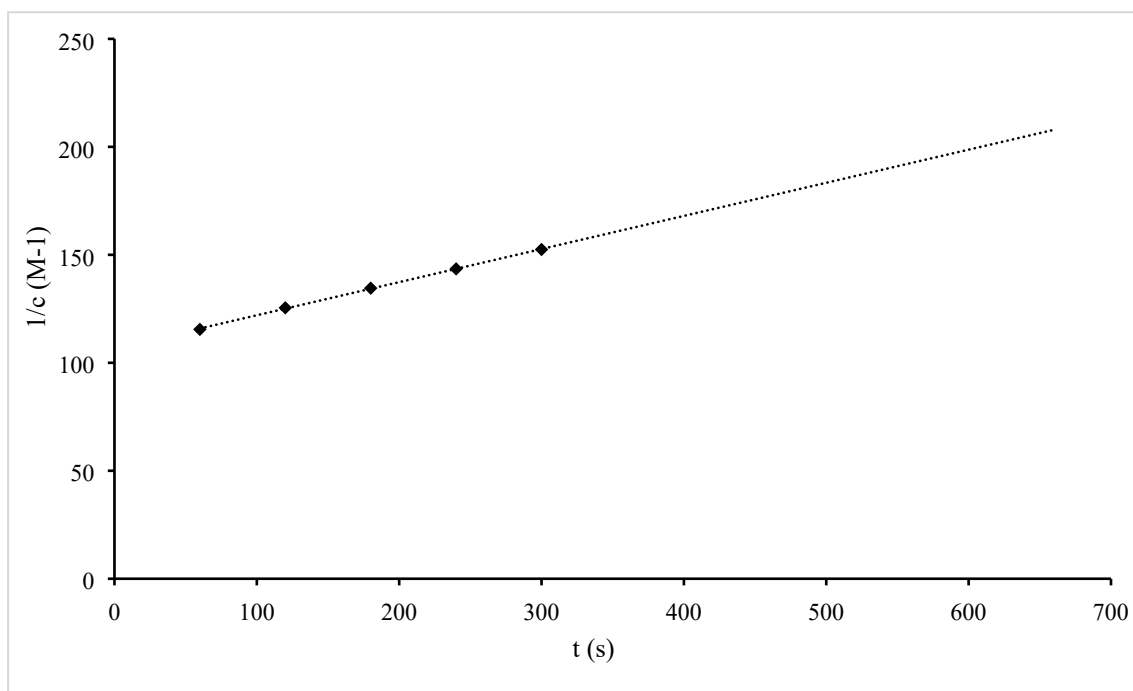

**Figure S42:** Second order kinetic plot for the reaction between **1** and **2** in imidazole HCl buffer (100 mM, pH 7.0,  $23 \pm 1$  °C);  $k_2 = 0.16 \pm 0.02$  M<sup>-1</sup>s<sup>-1</sup>.



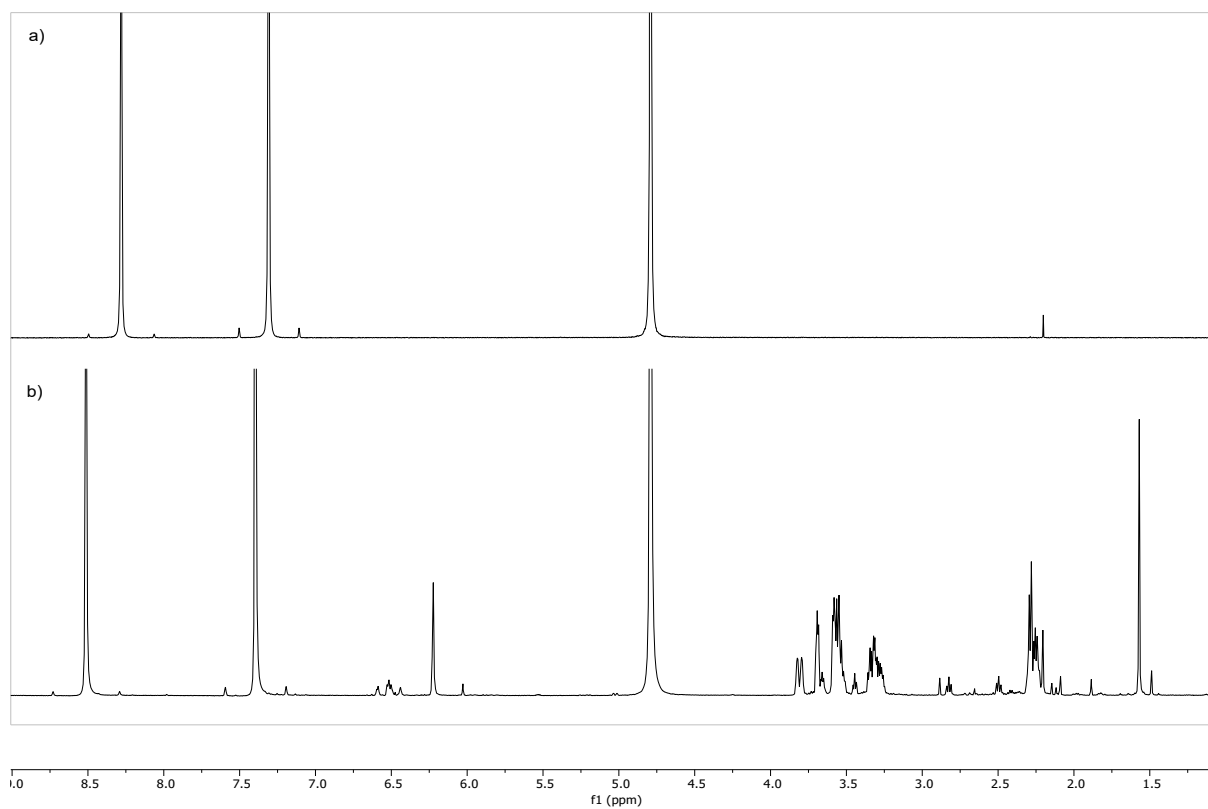

**Figure S43:** <sup>1</sup>H NMR spectra (500 MHz, D<sub>2</sub>O) showing (a) imidazole HCl buffer and (b) cycloadduct products from kinetic experiments.

### 3.6 PIPES pH 7.0

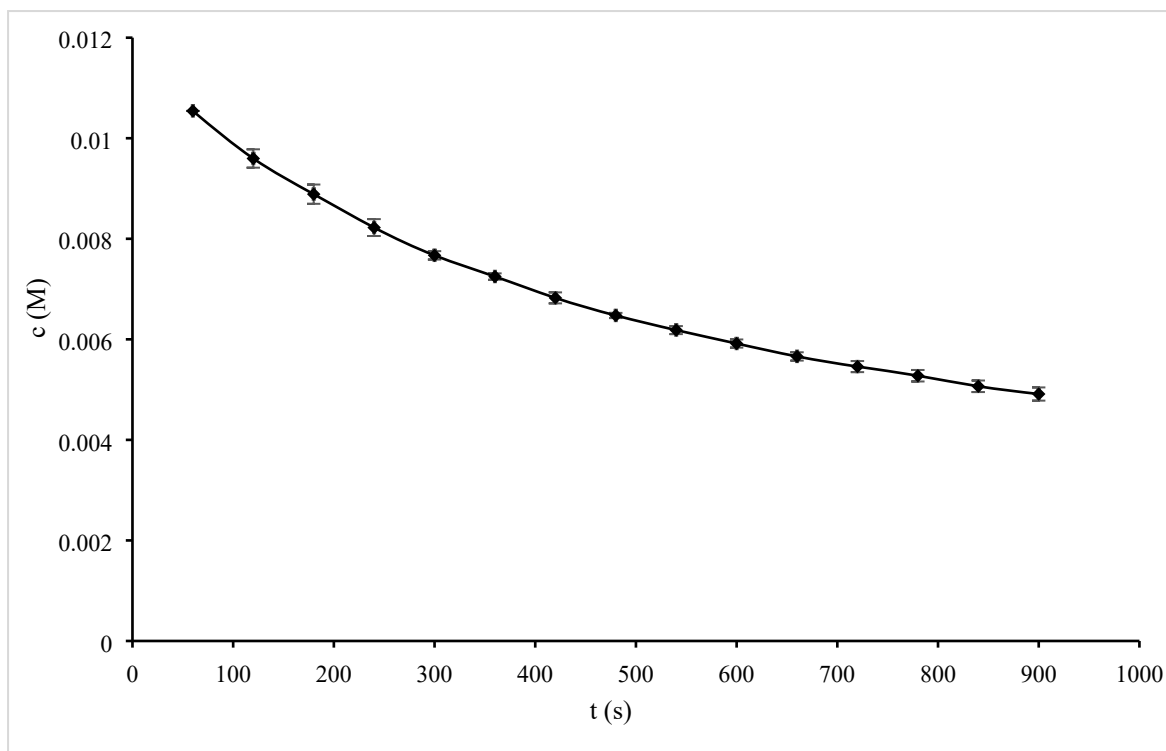

**Figure S44:** Concentration of pentafulvene **1** versus time for reaction between **1** and **2** in PIPES buffer (100 mM, pH 7.0). Timepoints taken at 1 min intervals over a 15 min period as monitored *via* HPLC at  $23 \pm 1$  °C ( $n = 3$ ).

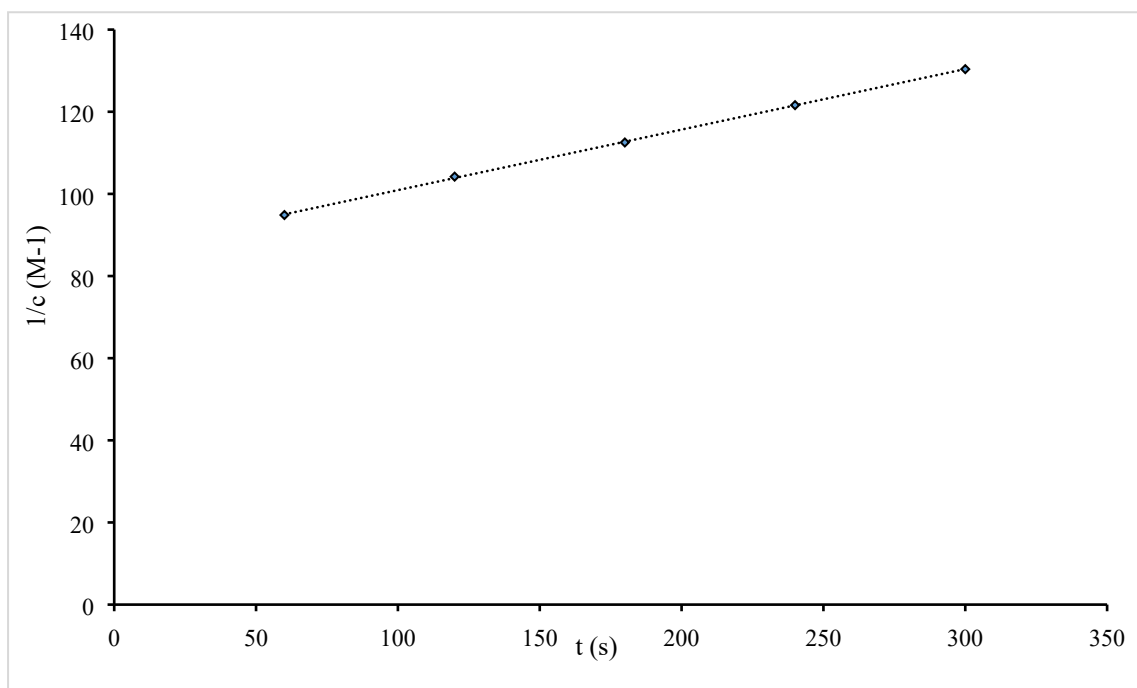

**Figure S45:** Second order kinetic plot for the reaction between **1** and **2** in PIPES buffer (100 mM, pH 7.0,  $23 \pm 1$  °C);  $k_2 = 0.15 \pm 0.01$  M<sup>-1</sup>s<sup>-1</sup>.

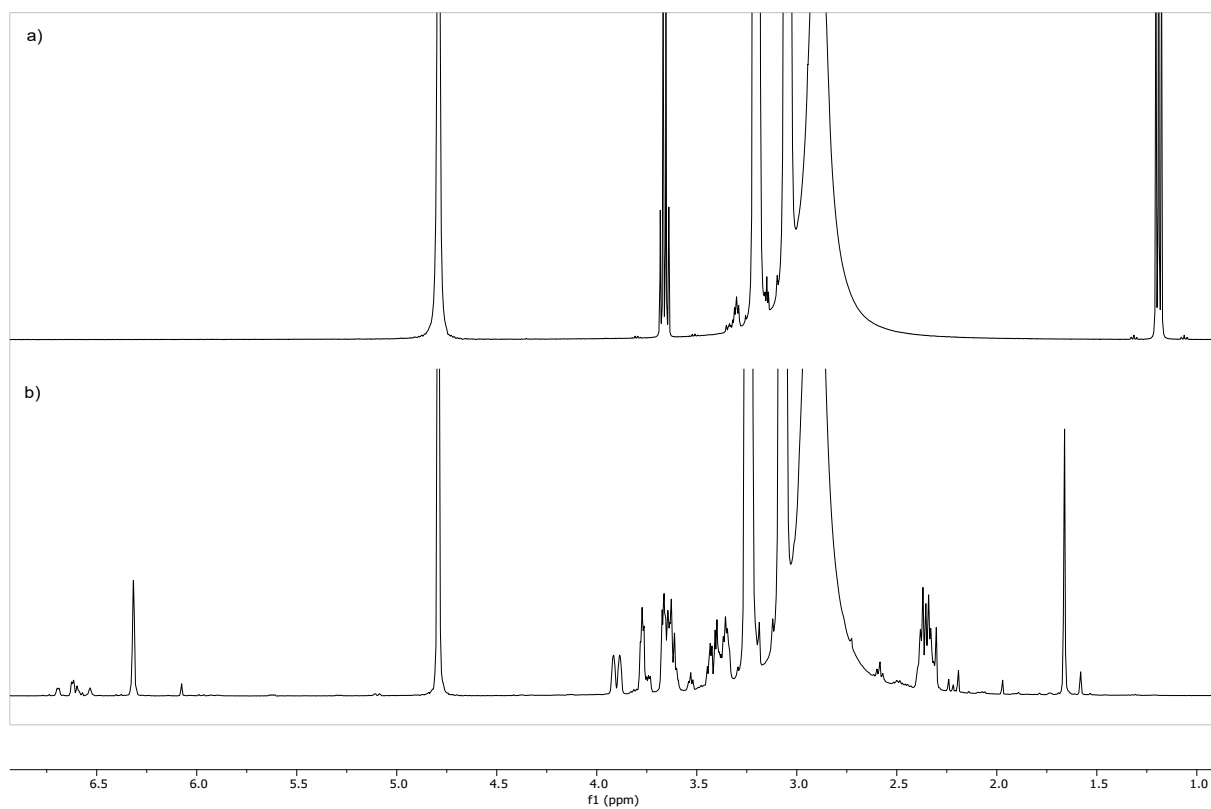

**Figure S46:**  $^1\text{H}$  NMR spectra (500 MHz,  $\text{D}_2\text{O}$ ) showing (a) PIPES buffer and (b) cycloadduct products from kinetic experiments.

### 3.7 Ultrapure Water pH 7.0

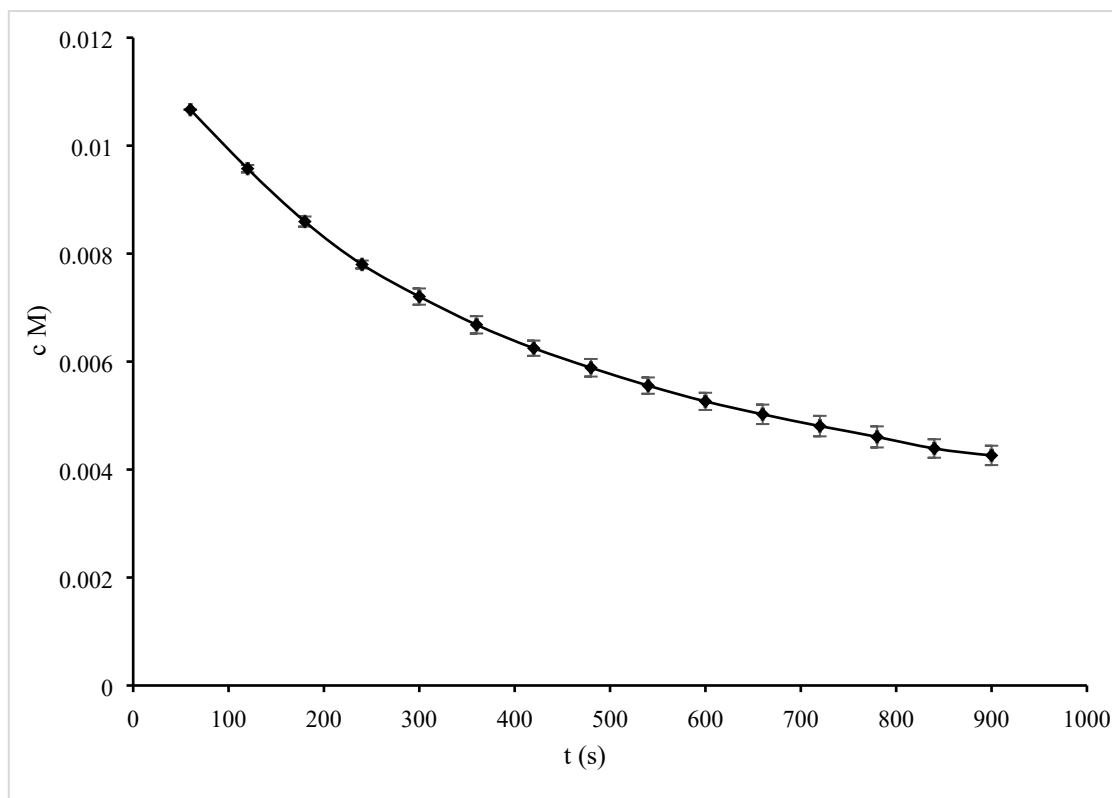

**Figure S47:** Concentration of pentafulvene **1** versus time for reaction between **1** and **2** in ultrapure water (pH 7.0). Timepoints taken at 1 min intervals over a 15 min period as monitored *via* HPLC at  $23 \pm 1$  °C ( $n = 3$ ).

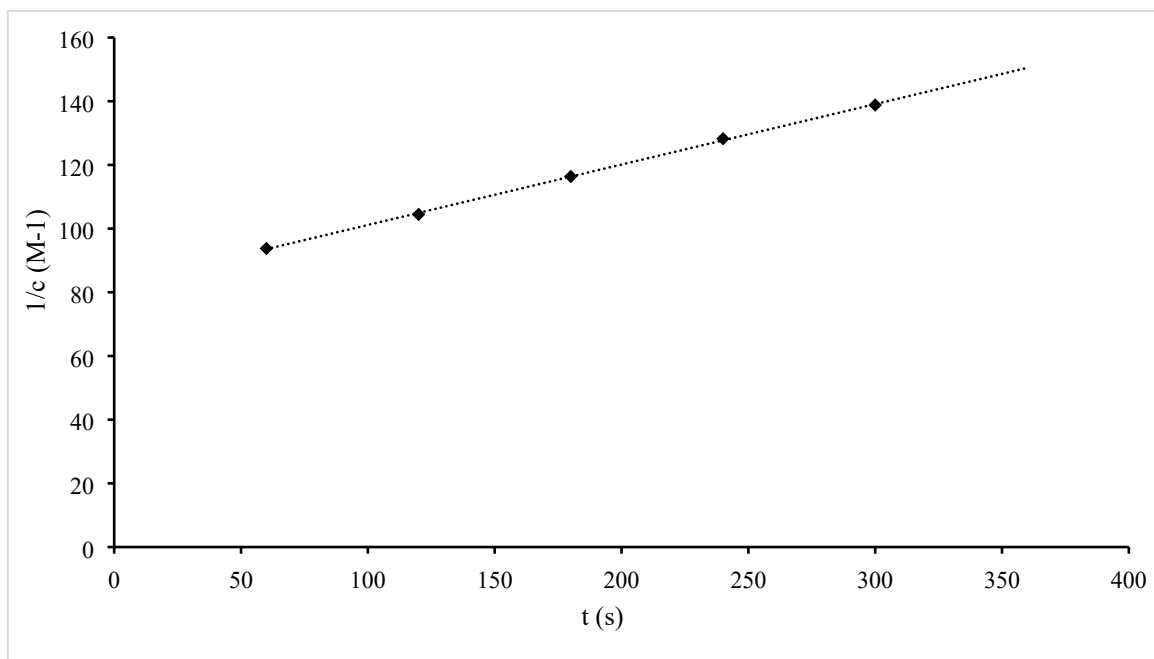

**Figure S48:** Second order kinetic plot for the reaction between **1** and **2** in ultrapure water (pH 7.0,  $23 \pm 1$  °C);  $k_2 = 0.19 \pm 0.01$  M<sup>-1</sup>s<sup>-1</sup>.

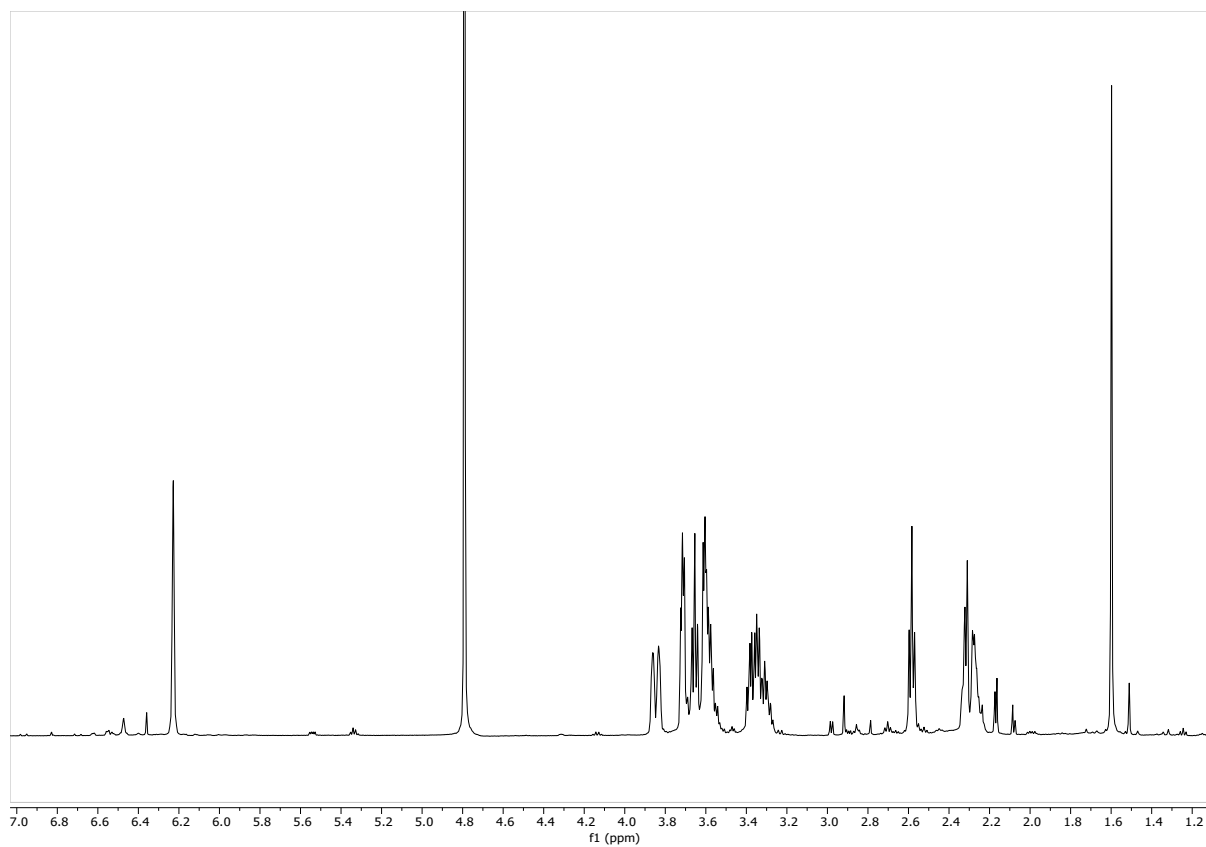

**Figure S49:**  $^1\text{H}$  NMR spectrum (500 MHz,  $\text{D}_2\text{O}$ ) showing cycloadduct products from kinetic experiments.

### 3.8 PBS pH 7.4

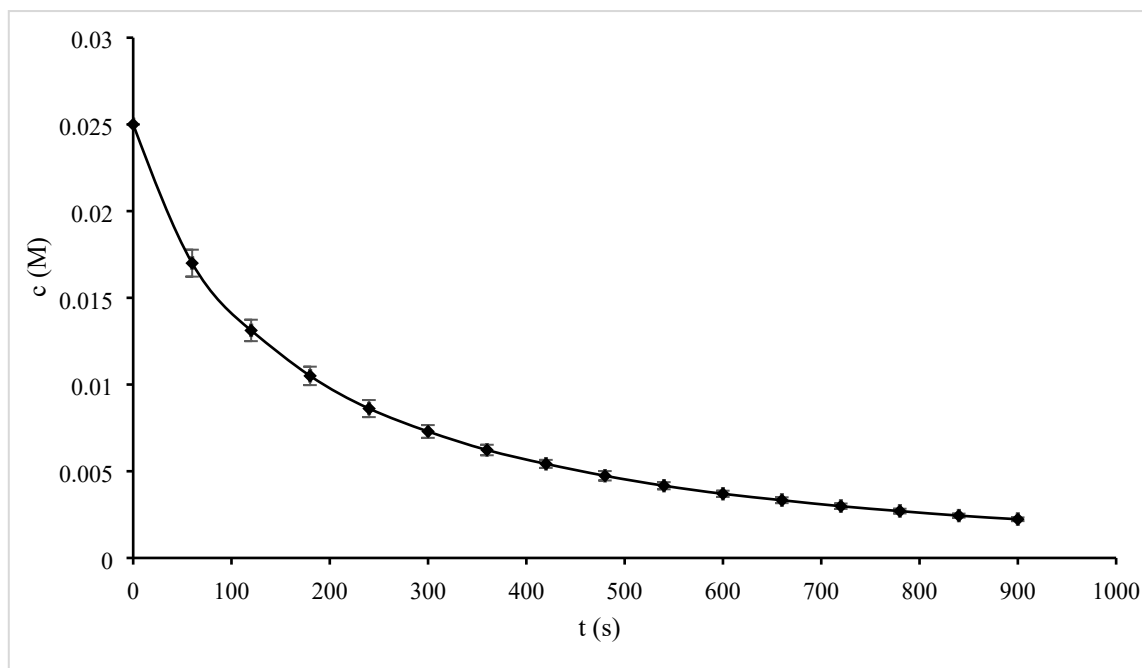

**Figure S50:** Concentration of pentafulvene **1** versus time for reaction between **1** and **2** in PBS buffer (100 mM, pH 7.4). Timepoints taken at 1 min intervals over a 15 min period as monitored *via* HPLC at  $23 \pm 1$  °C ( $n = 3$ ).



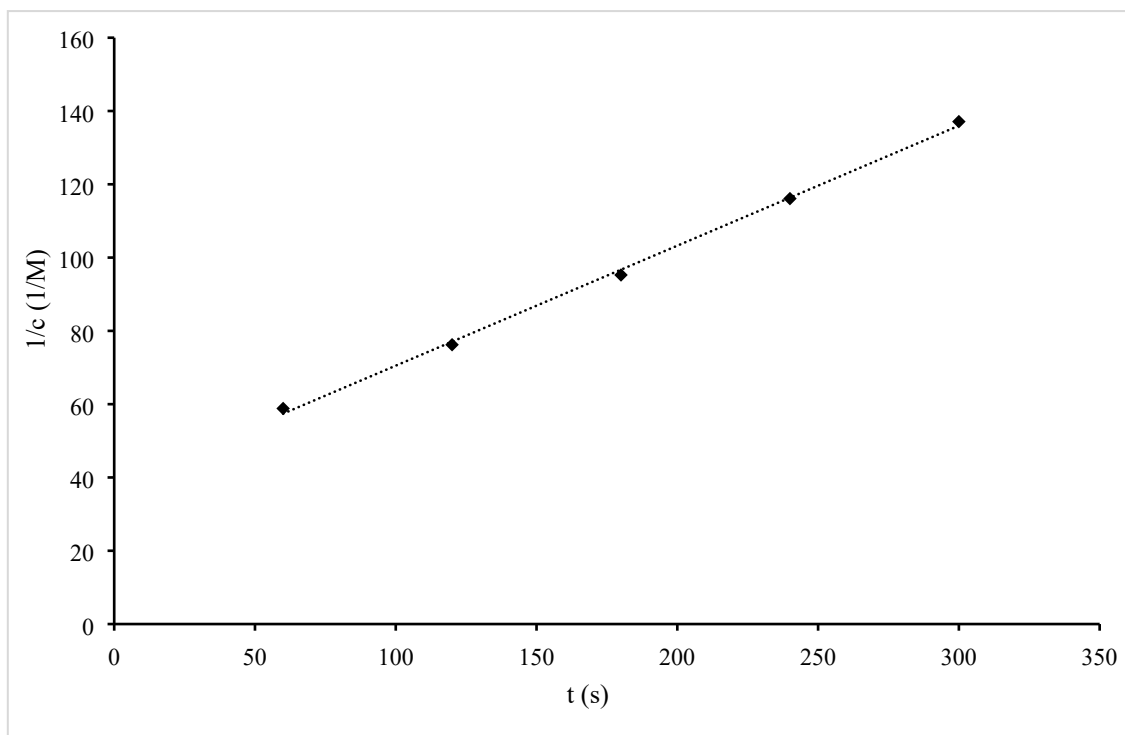

**Figure S51:** Second order kinetic plot for the reaction between **1** and **2** in PBS buffer (100 mM, pH 7.4,  $23 \pm 1$  °C);  $k_2 = 0.33 \pm 0.02 \text{ M}^{-1}\text{s}^{-1}$ .

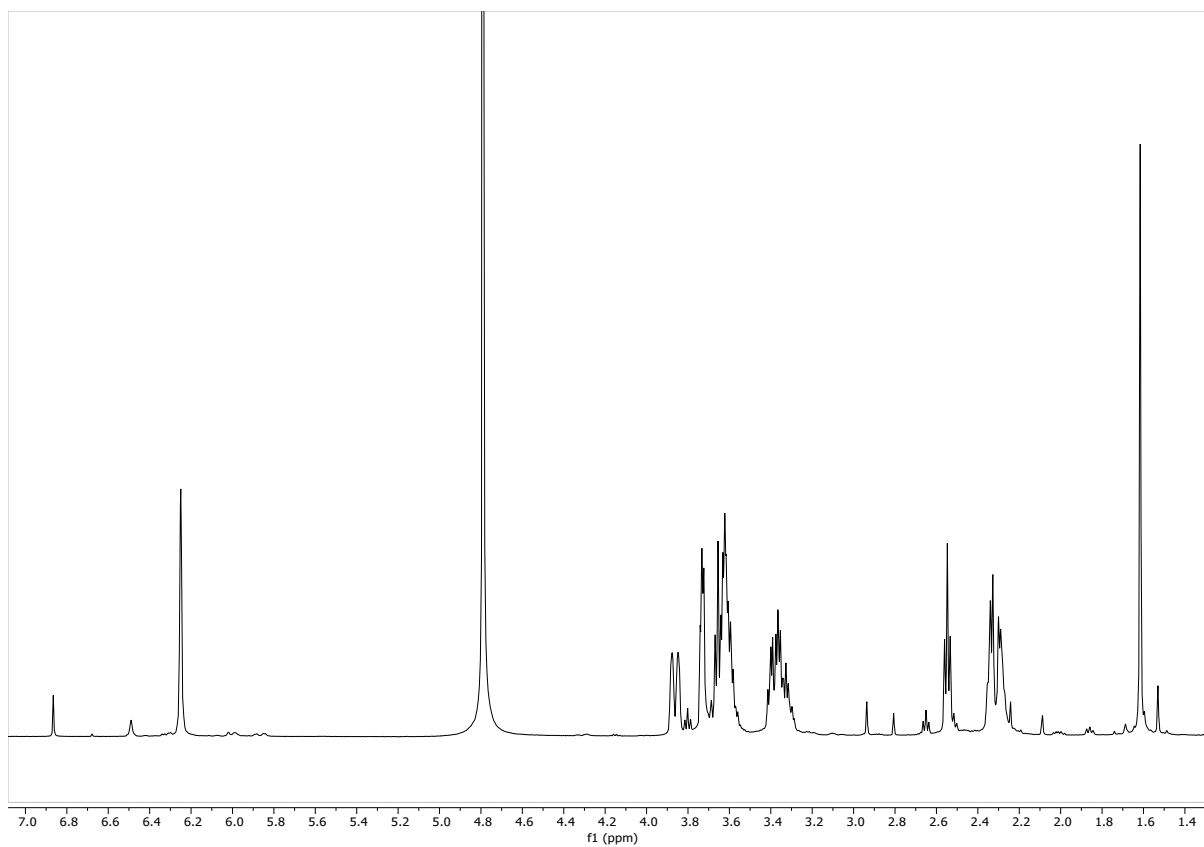

**Figure S52:** <sup>1</sup>H NMR spectrum (500 MHz, D<sub>2</sub>O) showing cycloadduct products from kinetic experiments in PBS.

### 3.9 HEPES pH 7.5

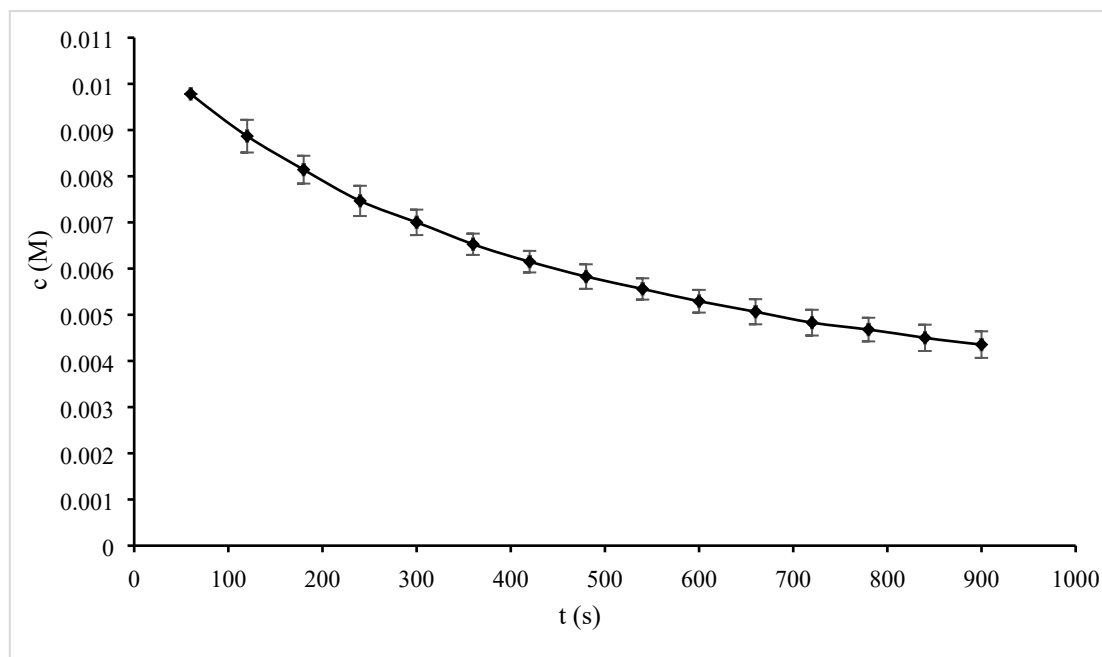

**Figure S53:** Concentration of pentafulvene **1** versus time for reaction between **1** and **2** in HEPES buffer (100 mM, pH 7.5). Timepoints taken at 1 min intervals over a 15 min period as monitored *via* HPLC at  $23 \pm 1$  °C ( $n = 3$ ).

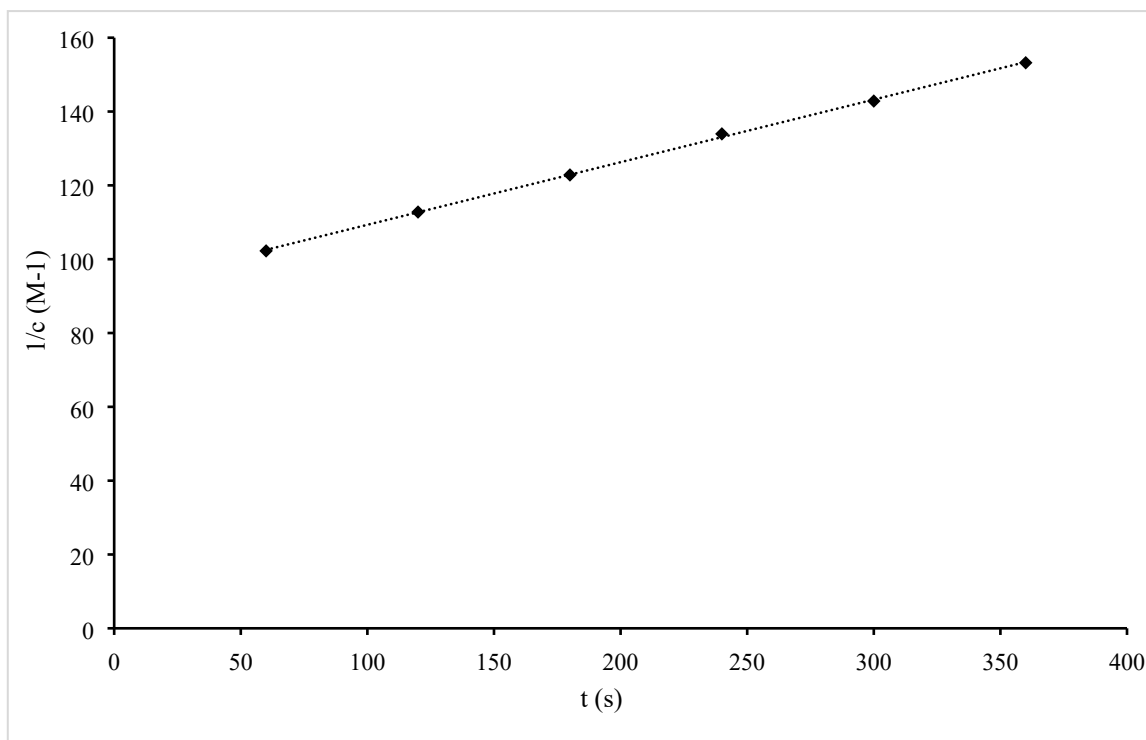

**Figure S54:** Second order kinetic plot for the reaction between **1** and **2** in HEPES buffer (100 mM, pH 7.5,  $23 \pm 1$  °C);  $k_2 = 0.17 \pm 0.01$  M<sup>-1</sup>s<sup>-1</sup>.

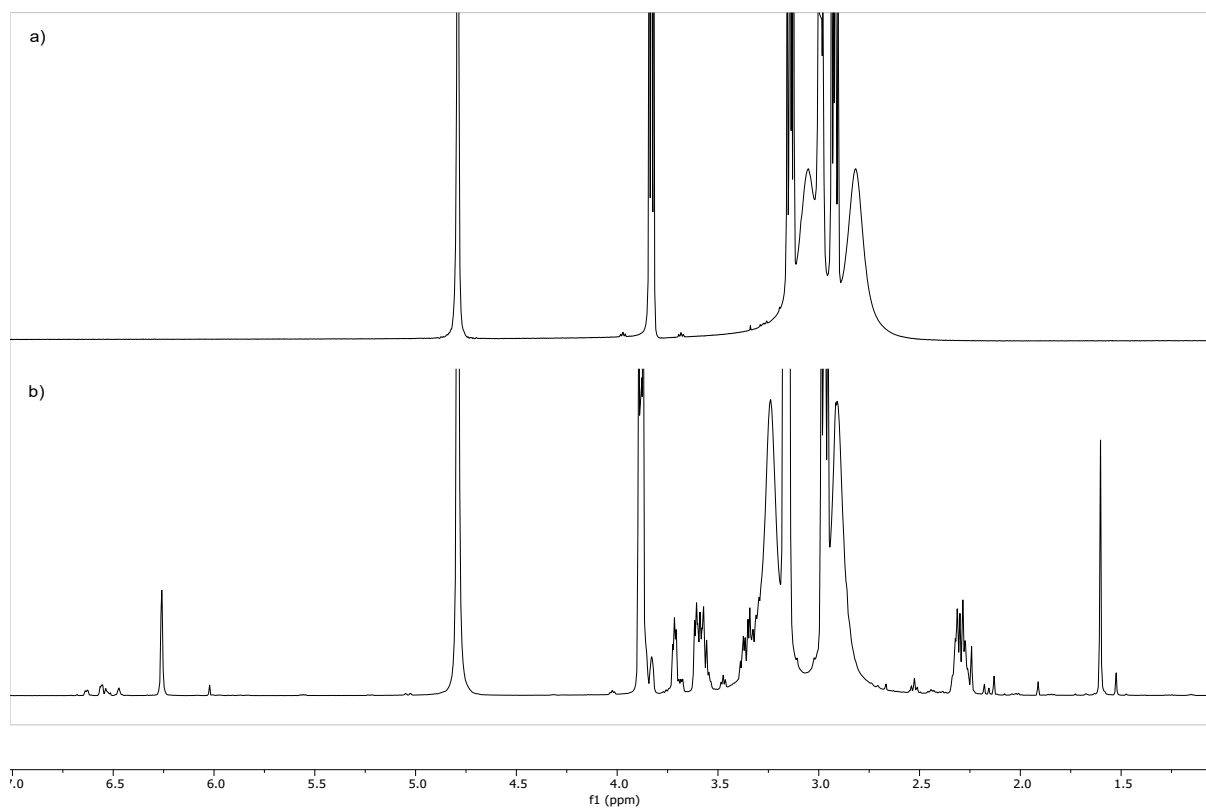

**Figure S55:** <sup>1</sup>H NMR spectra (500 MHz, D<sub>2</sub>O) showing (a) HEPES buffer and (b) cycloadduct products from kinetic experiments.

### 3.10 Trizma pH 7.5

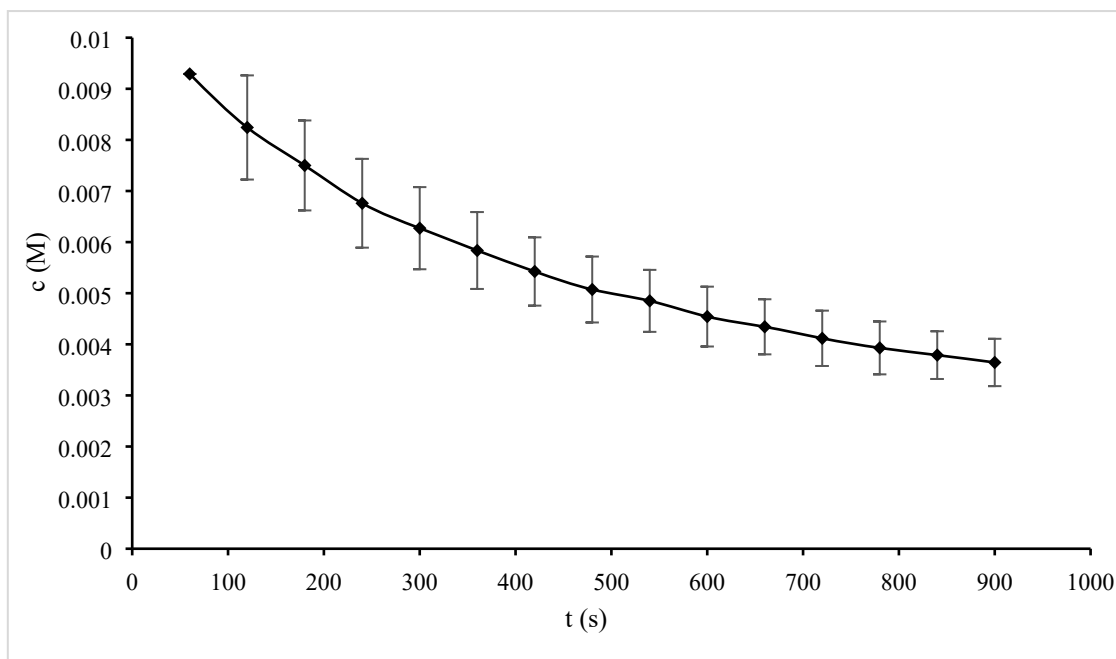

**Figure S56:** Concentration of pentafulvene **1** versus time for reaction between **1** and **2** in trizma buffer (100 mM, pH 7.5). Timepoints taken at 1 min intervals over a 15 min period as monitored *via* HPLC at  $23 \pm 1$  °C ( $n = 3$ ).

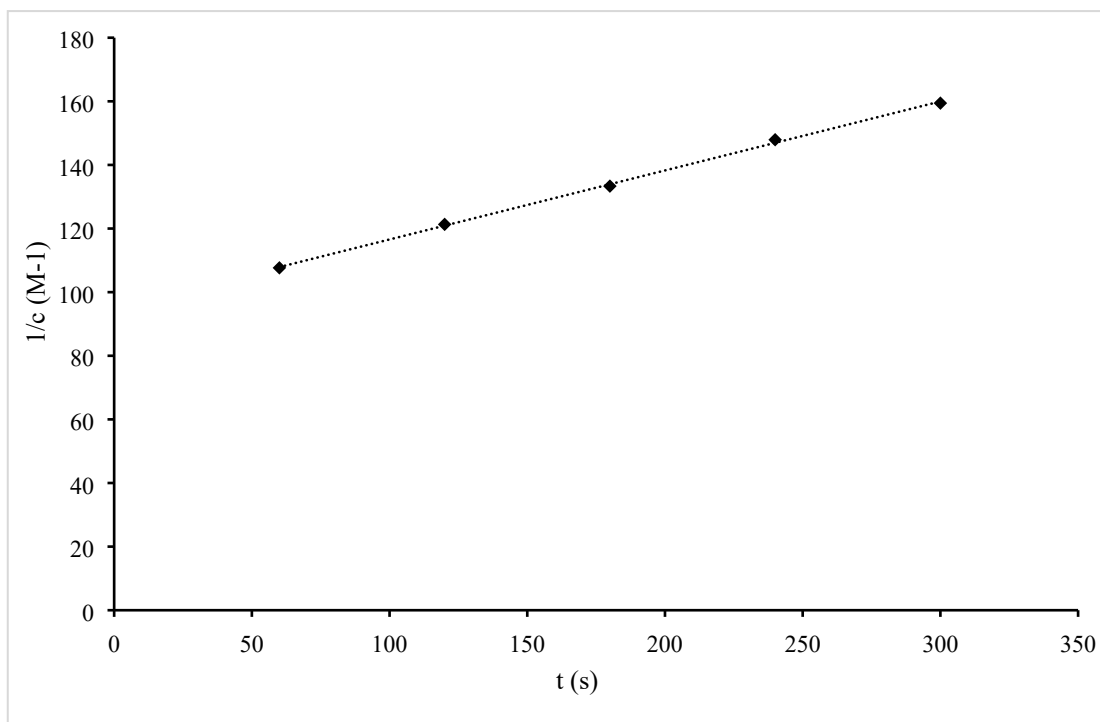

**Figure S57:** Second order kinetic plot for the reaction between **1** and **2** in trizma buffer (100 mM, pH 7.5,  $23 \pm 1$  °C);  $k_2 = 0.22 \pm 0.04$  M<sup>-1</sup>s<sup>-1</sup>.

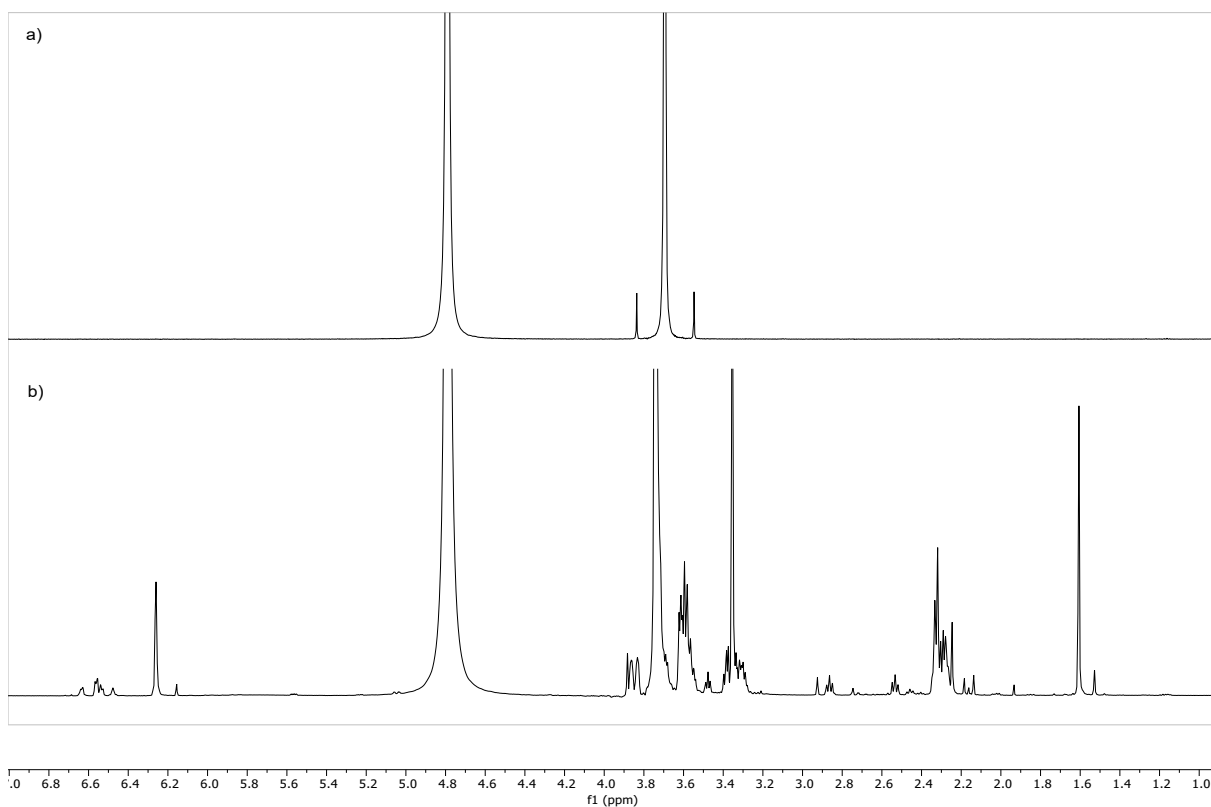

**Figure S58:** <sup>1</sup>H NMR spectra (500 MHz, D<sub>2</sub>O) showing (a) trizma buffer and (b) cycloadduct products from kinetic experiments.



### 3.11 Tricine pH 8.1

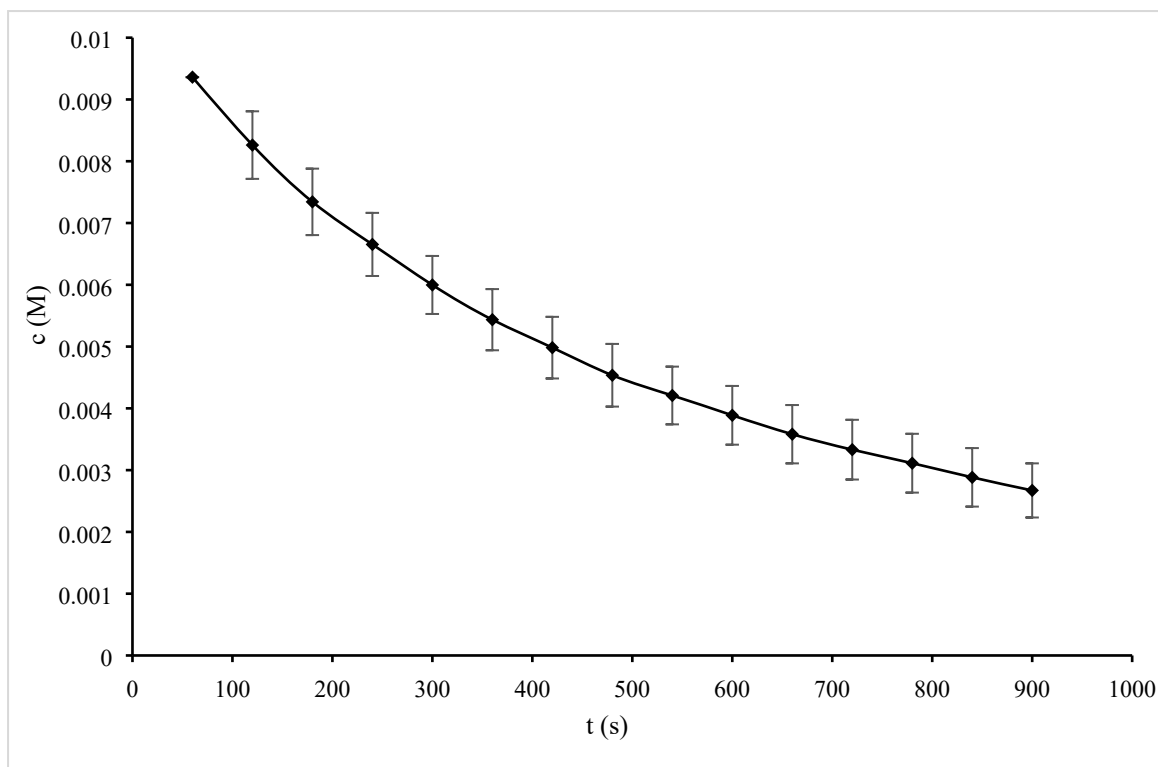

**Figure S59:** Concentration of pentafulvene **1** versus time for reaction between **1** and **2** in tricine buffer (100 mM, pH 8.1). Timepoints taken at 1 min intervals over a 15 min period as monitored *via* HPLC at  $23 \pm 1$  °C ( $n = 3$ ).

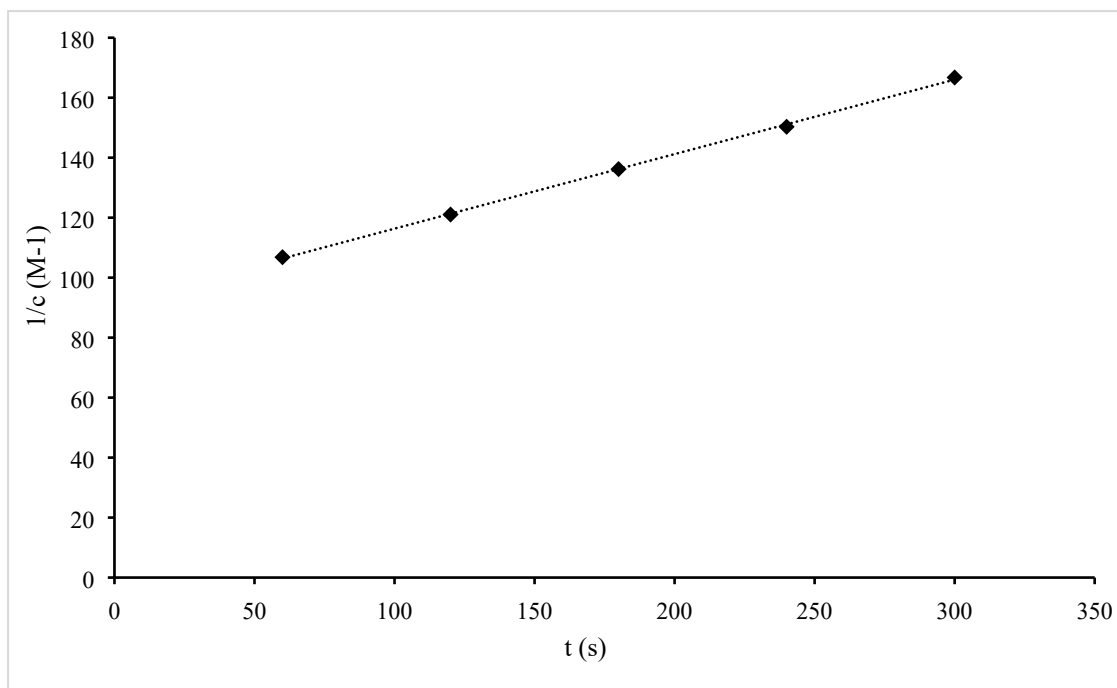

**Figure S60:** Second order kinetic plot for the reaction between **1** and **2** in tricine buffer (100 mM, pH 8.1,  $23 \pm 1$  °C);  $k_2 = 0.25 \pm 0.03$  M<sup>-1</sup>s<sup>-1</sup>.

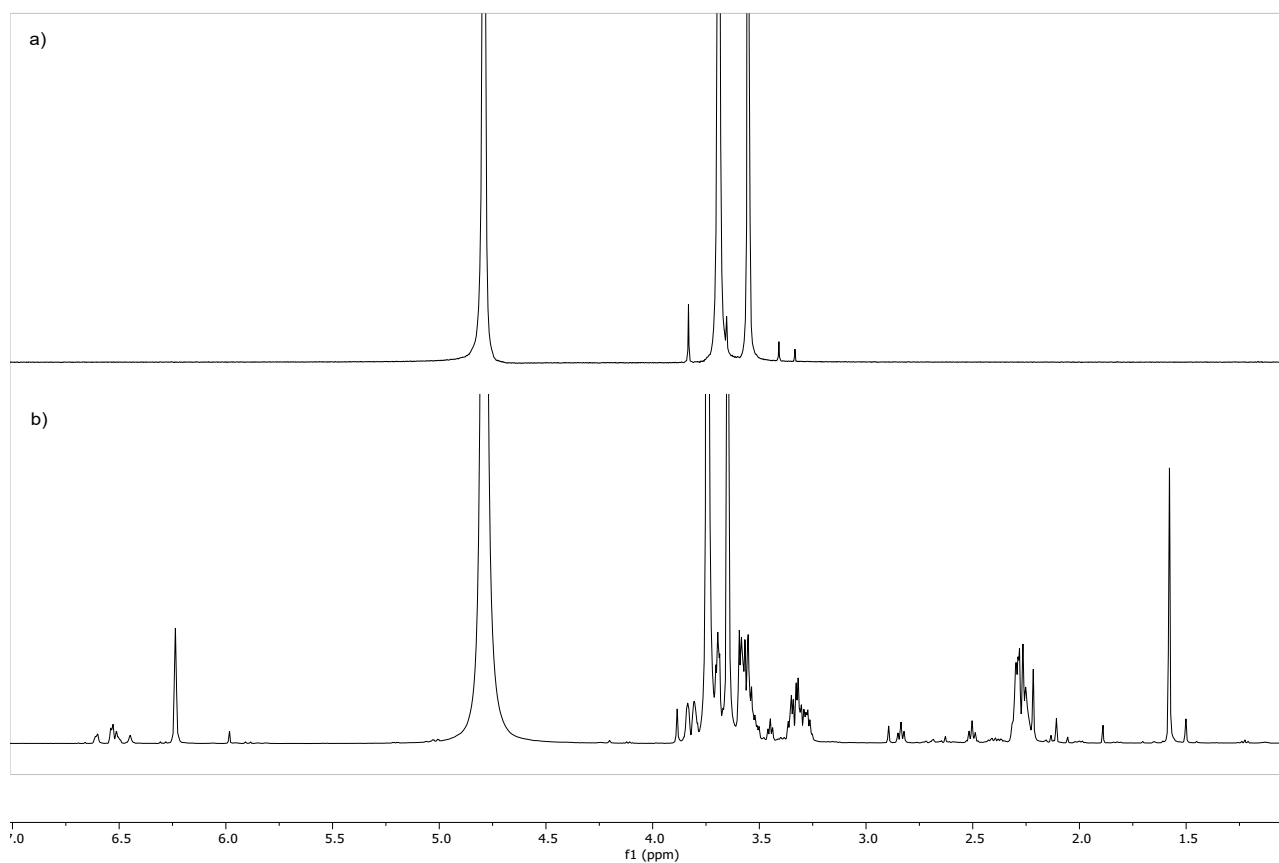

**Figure S61:** <sup>1</sup>H NMR spectrum (500 MHz, D<sub>2</sub>O) showing (a) tricine buffer and (b) cycloadduct products from kinetic experiments.

### 3.12 Bicine pH 8.3

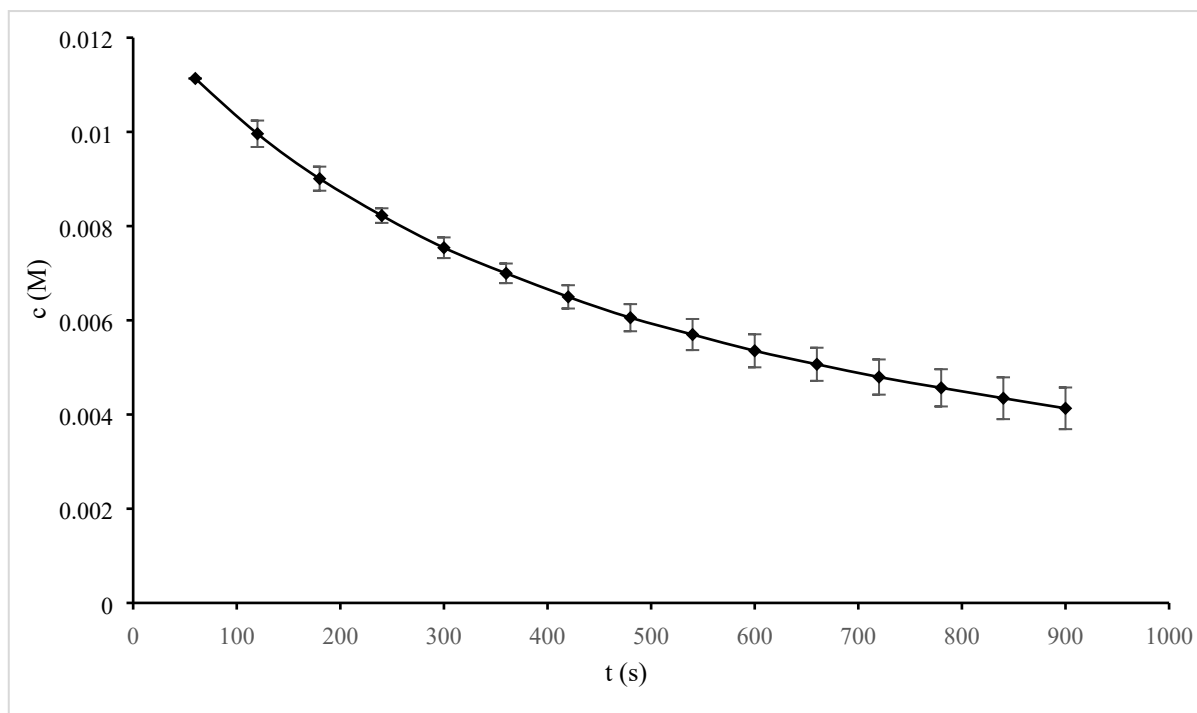

**Figure S62:** Concentration of pentafulvene **1** versus time for reaction between **1** and **2** in bicine buffer (100 mM, pH 8.3). Timepoints taken at 1 min intervals over a 15 min period as monitored *via* HPLC at  $23 \pm 1$  °C ( $n = 3$ ).

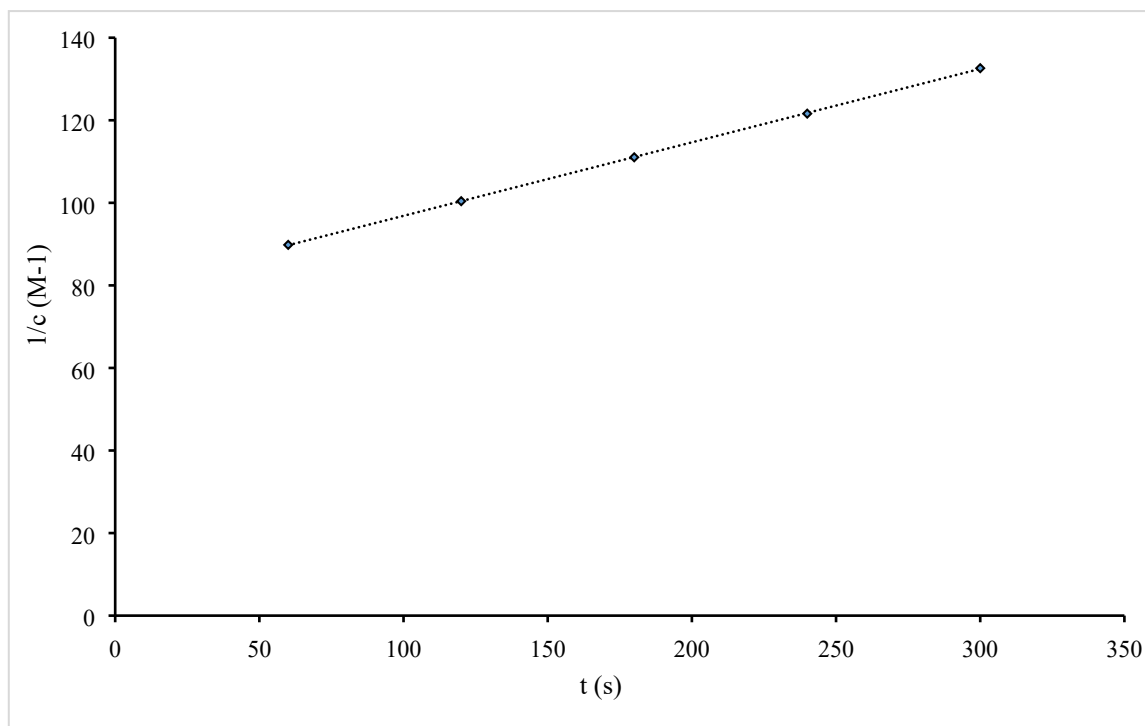

**Figure S63:** Second order kinetic plot for the reaction between **1** and **2** in bicine buffer (100 mM, pH 8.3,  $23 \pm 1$  °C);  $k_2 = 0.18 \pm 0.02$  M<sup>-1</sup>s<sup>-1</sup>.

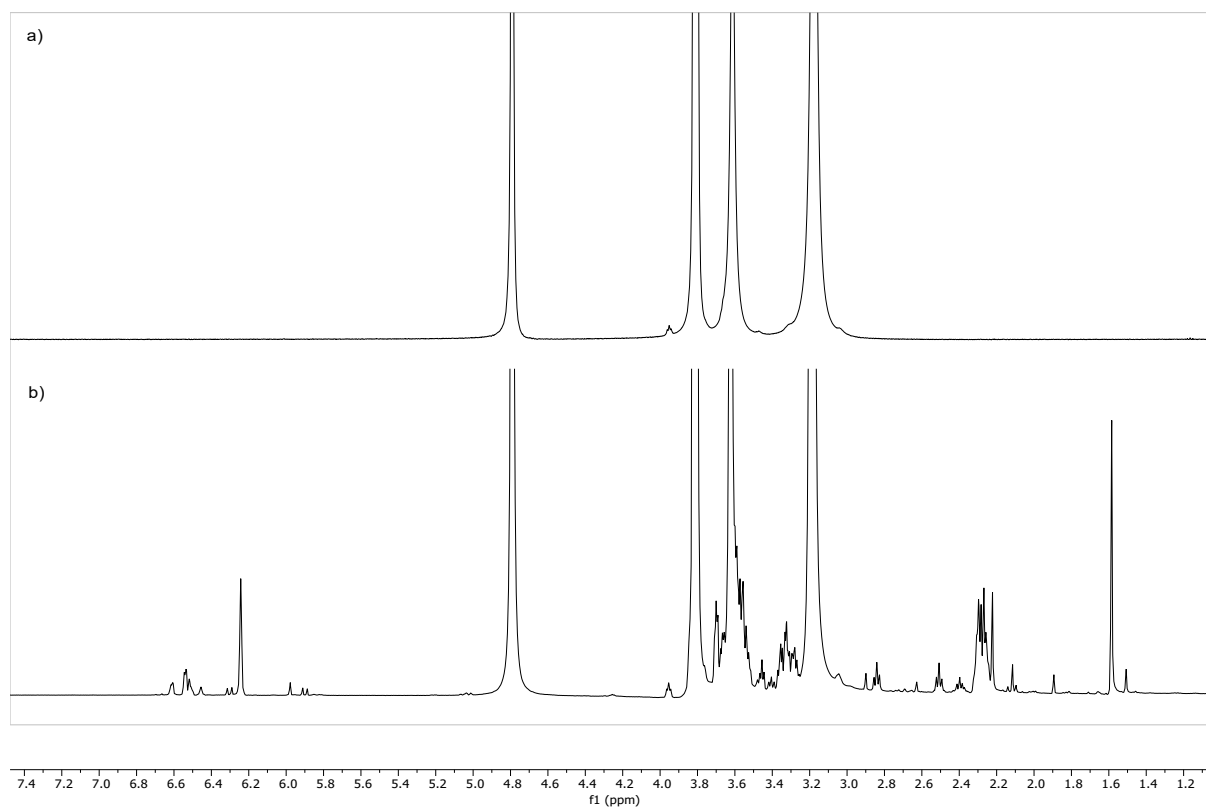

**Figure S64:** <sup>1</sup>H NMR spectrum (500 MHz, D<sub>2</sub>O) showing (a) bicine buffer and (b) cycloadduct products from kinetic experiments.

### 3.13 Glycine NaOH pH 8.9

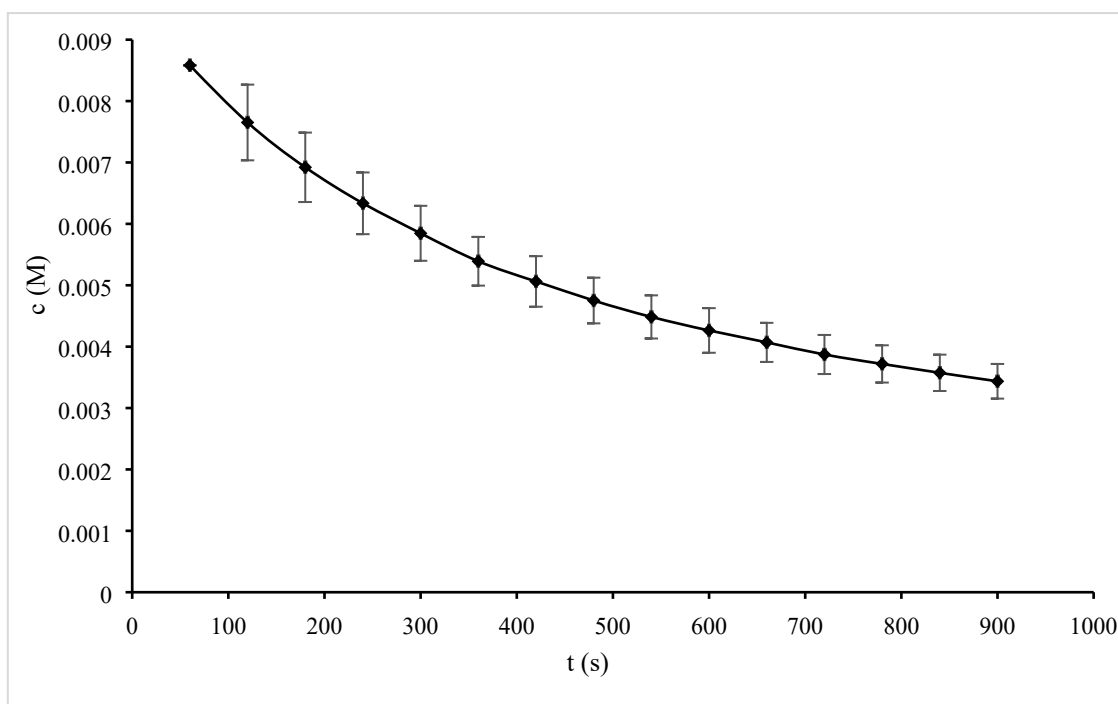

**Figure S65:** Concentration of pentafulvene **1** versus time for reaction between **1** and **2** in glycine NaOH buffer (100 mM, pH 8.9). Timepoints taken at 1 min intervals over a 15 min period as monitored *via* HPLC at  $23 \pm 1$  °C ( $n = 3$ ).

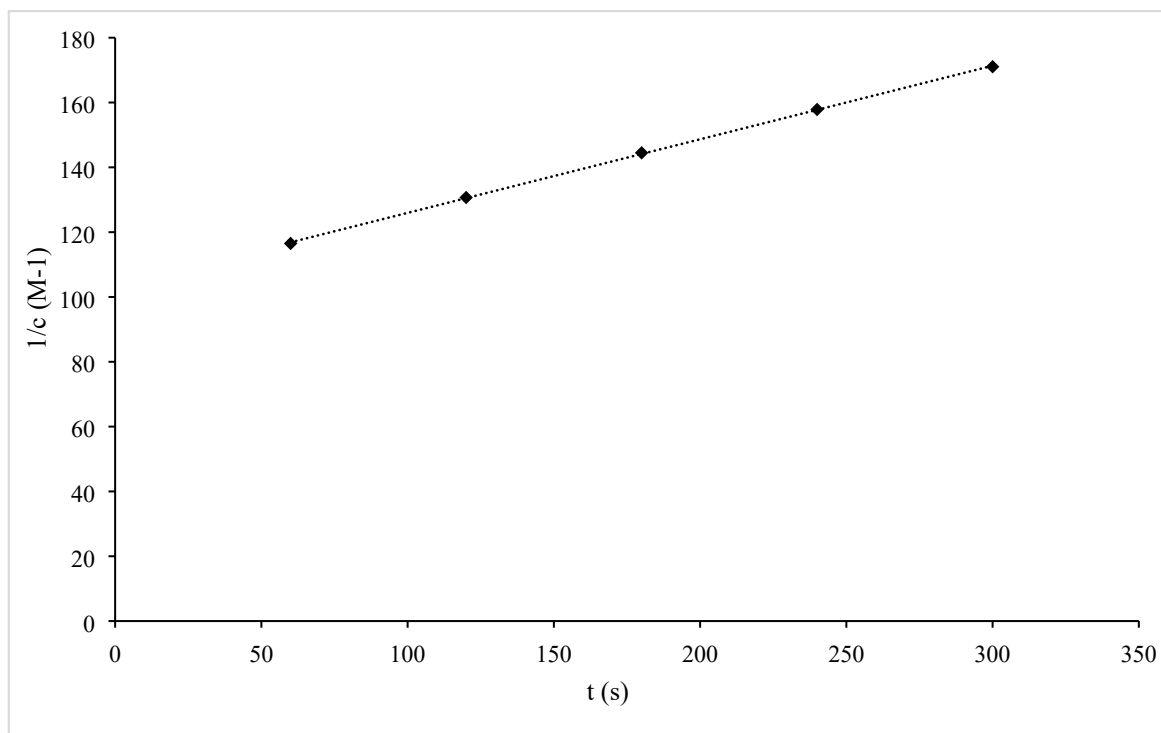

**Figure S66:** Second order kinetic plot for the reaction between **1** and **2** in glycine NaOH buffer (100 mM, pH 8.9,  $23 \pm 1$  °C);  $k_2 = 0.23 \pm 0.01$  M<sup>-1</sup>s<sup>-1</sup>.



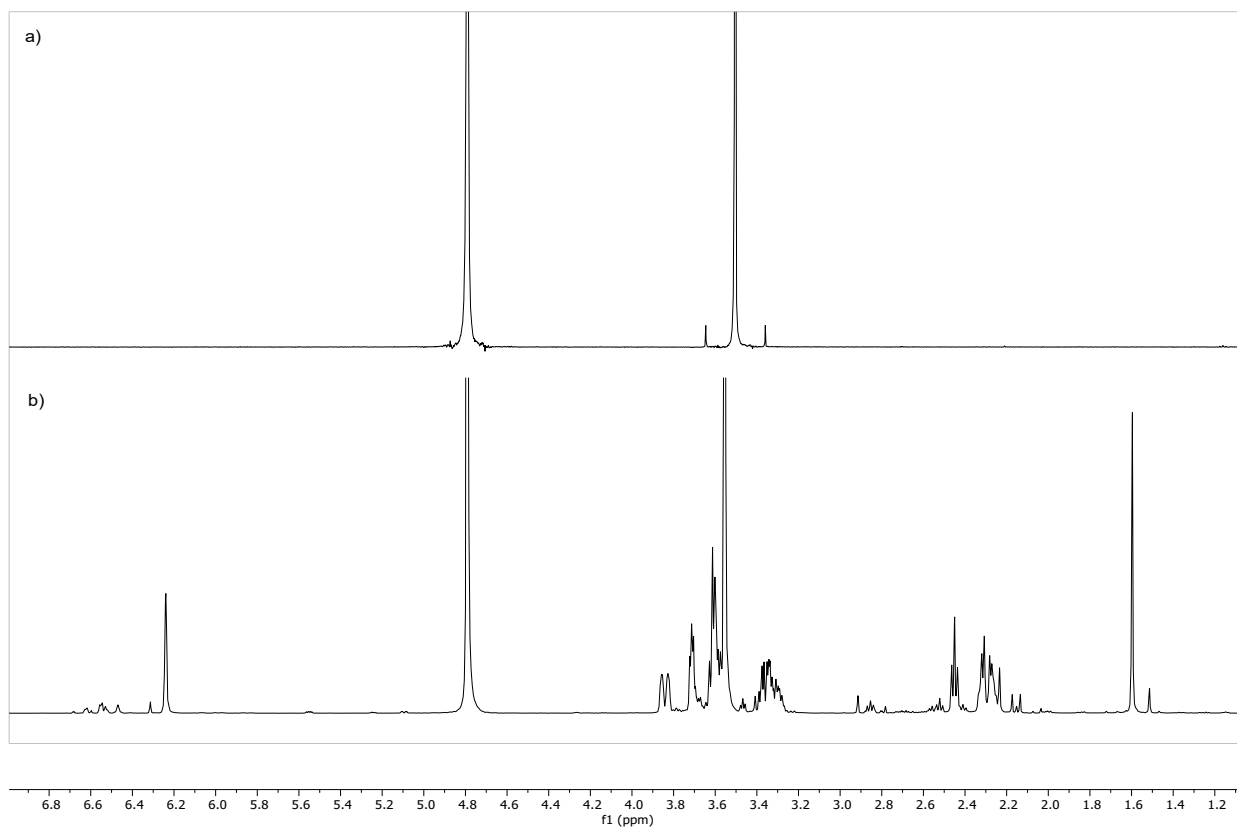

**Figure S67:** <sup>1</sup>H NMR spectra (500 MHz, D<sub>2</sub>O) showing (a) glycine NaOH buffer and (b) cycloadduct products from kinetic experiments.

## References

1. Krężel, A. and Bal, W. A formula for correlating  $pK_a$  values determined in  $D_2O$  and  $H_2O$ . *J. Inorg. Biochem.*, **2004**, *98*, 161-166.
